# Supplementary material
Source: publisher figshare collection journal article supplement (https://tandf.figshare.com/ndownloader/files/37568774)
Supplement: Supplementary file 1 [file 37568774]

## Sheet: Sheet1
Supplementary Table 1 Genes co-expressed in adipose and muscle tissues in buffalo and cattle.
Transcript_ID	Buffalo muscle_1	Buffalo muscle_2	Buffalo muscle_3	Buffalo adipose_1	Buffalo adipose_2	Buffalo adipose_3	Cattle muscle_1	Cattle muscle_2	Cattle muscle_3	Cattle adipose_1	Cattle adipose_2	Cattle adipose_3
ENSBTAT00000000005	2.16975	2.11846	2.31523	4.97162	4.30745	4.40815	2.45089	3.22854	2.64783	3.74342	2.8925	3.40241
ENSBTAT00000000008	0	0	0	0.0461254	0.0407362	0	0.25459	0	0.0829862	0.603886	0.114915	0.344315
ENSBTAT00000000009	0.777682	0.436111	0.946559	0.397235	0.446957	0.14108	0.58693	0.713332	0.709523	1.70593	1.68874	1.68515
ENSBTAT00000000010	5.42521	5.42138	5.40173	3.63945	4.39045	3.69292	5.09892	4.79656	4.84393	4.25948	4.18063	4.22735
ENSBTAT00000000013	3.33946	3.58017	3.56654	2.80028	2.92613	2.8772	3.79858	3.43223	3.98186	3.37301	3.28829	2.98301
ENSBTAT00000000014	6.36657	6.65736	6.42643	6.1396	6.52751	5.8991	6.42642	5.52849	5.85737	6.05028	5.68281	6.11162
ENSBTAT00000000015	0.303935	0.730137	0.953799	0.291619	0.651648	0.497583	0.483655	1.1086	0.982708	1.32977	1.29319	1.57576
ENSBTAT00000000016	0.992953	0.247084	0.677357	1.02676	0.180112	0.952651	0.332303	0.927271	0.594527	0.559668	0.43838	0.547113
ENSBTAT00000000017	4.49098	4.58544	3.93605	3.7091	3.73129	3.7874	4.91156	4.67233	4.12554	3.57946	3.80729	3.52887
ENSBTAT00000000021	5.91117	6.09592	6.15629	7.15204	6.70703	7.26676	6.47214	6.45521	6.69915	7.38469	7.07339	7.59403
ENSBTAT00000000022	4.21669	4.46657	3.93012	4.63434	4.78685	4.61543	4.1614	4.27641	4.00593	5.04458	4.67102	4.77495
ENSBTAT00000000024	2.44183	2.09831	2.11199	1.83681	1.69468	1.2558	3.04532	3.13724	3.04823	2.07713	1.93779	2.25653
ENSBTAT00000000025	4.04057	4.33054	4.0204	4.36929	4.48159	4.71741	4.53745	4.61206	4.5501	4.14498	4.3451	4.19749
ENSBTAT00000000027	5.39888	5.19316	5.08226	5.43352	5.23462	5.03128	5.37039	4.92083	4.99886	4.68735	5.07719	5.04963
ENSBTAT00000000029	2.3486	2.15147	2.2829	1.90764	1.73007	1.48679	2.69348	2.88283	2.45438	2.6469	2.9118	2.98105
ENSBTAT00000000033	0	0	0.185713	0.238811	0.354715	0	0.23727	0	0	0.473639	0.0810366	1.05231
ENSBTAT00000000034	0.0711244	0.05735	0.182155	0	0.0359846	0.0659437	0.0403986	0.0581391	0.10865	0.509972	0.389229	0.326145
ENSBTAT00000000036	1.92319	2.19779	2.06937	2.08101	2.17514	2.49869	2.86013	2.54179	2.30175	2.72571	1.77902	2.22216
ENSBTAT00000000037	4.88876	4.453	4.69611	0.650606	0.880859	1.39332	3.73755	3.16087	3.99103	1.00585	0.658976	0.516092
ENSBTAT00000000040	2.95967	3.02668	3.22968	3.68477	3.55411	3.44325	2.32911	2.38963	2.44389	2.1201	1.99185	2.51564
ENSBTAT00000000043	2.19917	2.73313	2.55929	2.36023	2.80915	2.55992	2.63458	2.87075	2.21991	2.54621	2.57058	2.56641
ENSBTAT00000000044	4.06797	4.03803	3.76837	2.44344	2.71796	2.69194	3.80515	4.14937	4.16316	3.0673	3.24732	3.46418
ENSBTAT00000000046	3.11144	2.36455	2.29187	3.11936	2.58418	2.30023	1.56792	2.85716	2.45743	3.68152	4.00945	3.6796
ENSBTAT00000000047	2.64707	2.59587	2.26791	2.13964	2.02976	1.85189	3.40929	3.24441	3.11625	2.79581	2.64426	3.14547
ENSBTAT00000000049	5.25139	4.91647	5.03605	0.156606	0	0	5.53828	4.17674	5.03724	0.0251456	0	0
ENSBTAT00000000051	2.57117	2.40058	2.58714	1.79602	1.3512	1.11357	2.80363	2.42575	3.04321	1.4134	1.77568	1.3835
ENSBTAT00000000055	3.7828	4.04987	3.66971	3.42237	3.58807	2.95402	4.22007	3.8385	4.00902	3.8405	3.69525	3.81386
ENSBTAT00000000057	3.5502	3.38927	3.19729	1.26295	1.09915	0.872971	3.57963	3.54998	3.78989	1.99034	2.24965	2.06974
ENSBTAT00000000060	0.755258	1.12469	1.16316	0.721397	0.766906	0.362499	1.43833	1.64122	1.88814	1.60686	1.63315	1.5476
ENSBTAT00000000061	2.72709	2.75928	2.96184	1.99084	2.73122	2.54082	1.3182	2.10344	2.00356	1.89657	2.34308	2.084
ENSBTAT00000000063	2.38595	2.0324	2.28844	1.76934	1.65521	1.04592	1.55547	2.76107	1.31999	2.79239	3.00565	3.31766
ENSBTAT00000000064	4.51668	3.18686	3.64674	0.000406442	0.000103795	1.85011	2.44335	2.14202	2.61768	1.26854	0.000234335	0.994505
ENSBTAT00000000069	1.3796	1.41555	1.68248	3.17724	3.25243	2.29537	3.585	3.75034	3.94891	5.22898	5.10356	4.82639
ENSBTAT00000000071	2.08673	2.10731	1.81316	1.26873	1.47794	1.37938	2.05767	1.93027	2.31986	2.44172	2.00193	2.63575
ENSBTAT00000000072	4.33433	4.56934	4.05799	4.02717	4.06604	3.03055	4.75879	4.33268	4.6396	3.38539	3.15887	3.57673
ENSBTAT00000000073	0.494622	0.40951	0.299898	0.14595	0.153472	0.0328476	0.589392	0.0433613	0.345403	0.0372446	0.0384669	0
ENSBTAT00000000074	1.78772	1.22892	1.31417	2.24839	2.1749	2.04128	1.80559	1.77267	1.06554	2.31996	2.34976	1.75771
ENSBTAT00000000078	0	0.0318267	0	0	0.0589876	0	1.28625	0	0.29843	0.30278	0.0843668	0
ENSBTAT00000000079	2.31419	3.202	3.1677	12.5989	12.9145	13.145	4.19558	6.44024	7.41169	12.7093	12.3763	13.0719
ENSBTAT00000000080	4.88168	4.84652	4.68629	4.1004	3.9822	3.74045	4.75915	3.55699	3.99158	2.84733	2.63186	3.27458
ENSBTAT00000000081	2.65894	2.28074	2.59034	2.96753	2.65409	2.75426	3.90318	3.95829	3.93334	5.02932	4.97109	4.84116
ENSBTAT00000000084	1.33391	1.57039	1.37123	2.8251	2.77231	2.83326	2.05347	2.86843	2.46444	3.16241	3.78909	2.68568
ENSBTAT00000000085	6.71747	5.98627	7.10221	4.57006	4.1665	3.9691	6.22198	5.60287	6.52276	4.64089	4.51998	4.65777
ENSBTAT00000000086	4.2235	3.83034	3.34629	4.58139	4.95796	4.15662	3.4654	5.43317	4.15713	4.41381	5.27515	4.79266
ENSBTAT00000000087	1.15408	1.30815	0.861081	1.33079	1.4089	1.61702	1.76118	1.02514	1.52436	1.57465	0.00111823	1.61979
ENSBTAT00000000088	3.72063	4.3525	3.93241	2.49035	2.48317	2.0575	3.19593	3.65395	3.38452	2.89638	2.93249	2.76066
ENSBTAT00000000091	4.01518	4.04778	3.88815	3.55621	3.55348	3.1628	4.7425	3.95481	4.28208	3.12023	2.89091	3.71094
ENSBTAT00000000092	4.48162	4.55004	4.2558	4.01141	4.14786	3.83848	4.45807	4.13705	4.48043	4.27325	4.29371	4.43342
ENSBTAT00000000094	0.0665736	0.339573	0	0.217778	0.932253	0	2.9574	0	2.09087	1.18197	0.352199	0.503126
ENSBTAT00000000096	3.36989	2.9283	2.88514	7.63264	7.62363	6.98788	4.26321	3.87546	3.84461	7.59219	7.0294	7.54582
ENSBTAT00000000097	2.93707	3.34529	2.45335	4.11289	4.14635	3.86785	2.76309	4.8561	2.69444	3.03519	3.38817	3.19855
ENSBTAT00000000099	2.64416	2.53167	2.57182	2.96185	3.14752	2.96052	2.91395	2.51747	3.18787	1.90732	1.88258	1.72385
ENSBTAT00000000100	7.71565	7.85395	7.88452	6.65275	6.49219	6.48048	8.47061	7.52045	7.90959	7.17875	6.49941	7.0646
ENSBTAT00000000101	8.21513	7.79635	7.7745	5.10829	4.98352	4.49964	7.16974	6.59497	7.58847	4.89992	4.92531	5.24218
ENSBTAT00000000103	0	0	0.205279	0	0.269686	0.114289	0.941839	1.01461	1.3174	0.899686	0.378619	0.949111
ENSBTAT00000000104	6.14992	6.0167	5.9745	3.35277	3.5434	3.64301	5.85927	4.83262	5.79765	4.11205	3.84885	3.90754
ENSBTAT00000000106	5.96691	5.96547	5.76497	5.20551	5.29773	5.61917	4.59636	4.74405	4.94557	5.10101	5.14272	5.17865
ENSBTAT00000000107	2.99574	3.04886	3.01689	2.76574	2.93158	2.89496	3.43712	3.66715	3.6978	2.8749	3.1265	2.96104
ENSBTAT00000000109	4.11973	4.36565	4.28747	6.02186	5.72401	5.64792	4.5826	4.9177	4.97634	6.10291	6.14418	6.25028
ENSBTAT00000000111	0.296582	0.350248	0.490856	0.120578	0.205641	0.0985662	0.229194	0.426124	0.0559726	0.0752439	0.255377	0.141101
ENSBTAT00000000112	4.42408	4.21881	4.35676	2.46866	2.28327	2.38186	4.09531	4.50042	5.34227	4.0565	4.10576	4.66428
ENSBTAT00000000114	4.03065	4.05024	3.98893	4.99257	4.68863	5.05137	4.08526	4.14326	3.83586	4.85909	4.64969	4.46901
ENSBTAT00000000115	0	0	0.0617042	0.0402875	0	0	0.477312	0.613153	0.739753	0.848816	1.37113	0.979123
ENSBTAT00000000119	4.02784	3.86906	4.16434	4.28777	4.02142	3.93036	3.75249	3.58746	3.95193	3.31819	3.44375	3.32591
ENSBTAT00000000123	3.1691	3.45487	3.20676	4.53025	4.18327	4.42358	3.53728	3.45868	3.33837	3.92215	3.46409	3.83394
ENSBTAT00000000131	0.745497	0.177654	0.820655	0.369957	0.158941	0.211923	0.210582	0.295712	0.282618	0.371097	0.264926	0.37435
ENSBTAT00000000134	0.136113	0	0	0	0.261427	0	0.674018	0.0758353	0.530572	0.273042	0.281102	2.3331
ENSBTAT00000000135	0.647428	0.295631	0.17093	0.36481	0.195718	0.340416	0.493407	0.237121	0.536914	0.325759	0.559734	0.197621
ENSBTAT00000000136	3.35941	3.77683	3.56662	3.31313	3.30071	3.55937	3.23487	3.04549	2.84068	2.15653	2.04209	2.04132
ENSBTAT00000000139	1.15826	0.672374	1.06664	0.193707	0.172808	0.141823	0.561663	1.78157	1.55162	1.98399	2.68238	2.1486
ENSBTAT00000000141	1.26505	1.34461	1.49963	1.30986	1.20274	1.29484	1.28451	1.97749	1.49044	2.01512	2.08791	2.54377
ENSBTAT00000000143	3.40746	3.53829	3.52449	2.74408	2.87501	2.86881	3.66006	3.70454	4.18304	3.46953	3.45253	3.44261
ENSBTAT00000000144	5.35157	5.53265	5.3654	7.21165	6.72522	7.08265	5.84943	5.79574	5.48878	6.58474	6.10966	6.54604
ENSBTAT00000000145	3.94214	4.26225	4.09528	1.96096	1.49863	0.566532	0.000752844	1.56675	1.64619	0.870316	0.391652	1.31054e-05
ENSBTAT00000000146	1.6199	1.41419	1.6503	2.60383	2.68031	3.22158	1.65664	3.23489	2.75201	6.22233	3.83784	5.93465
ENSBTAT00000000147	3.22057	3.54612	3.27386	4.5737	4.63786	4.03988	3.92118	4.09002	3.53676	5.00862	5.00804	4.64407
ENSBTAT00000000158	3.11786	3.16139	3.21792	4.4091	4.37982	4.42492	3.6019	3.56847	3.62964	4.13551	4.22228	4.09184
ENSBTAT00000000159	2.13507	1.41846	1.59589	4.76311	5.33439	5.19694	4.04906	4.26352	4.81716	7.33881	7.34735	6.26483
ENSBTAT00000000160	4.79944	4.0298	4.43954	3.87143	2.96144	3.70399	4.37297	3.63566	4.52664	3.71571	3.56063	3.72691
ENSBTAT00000000163	5.72381	5.88051	5.66839	6.73213	6.66359	6.6917	5.87454	5.53112	5.10139	6.03872	5.30526	6.02997
ENSBTAT00000000167	3.88215	4.03959	4.33279	3.30871	2.71949	2.66016	3.89141	3.50279	3.8702	3.9268	4.35168	3.89999
ENSBTAT00000000169	0	0.0780149	0	0.126989	0.229982	0.583111	0.0369054	0	0.0339136	0.06814	0	0.0652585
ENSBTAT00000000172	2.99289	3.35616	3.21673	4.00436	4.24829	4.13659	3.05026	2.84134	3.20166	2.76865	3.2655	3.13602
ENSBTAT00000000176	1.92555	2.32083	2.05286	0.906414	0.861264	0.786278	1.69594	1.99332	2.40161	1.81243	2.08081	2.03866
ENSBTAT00000000177	4.91356	4.98101	4.84393	2.77103	2.59166	2.22742	4.51011	4.09935	4.68712	3.97179	3.75948	3.59258
ENSBTAT00000000179	7.75299	7.35071	7.13816	5.53517	5.66214	5.34085	7.38168	6.72518	7.7564	4.75852	5.32969	4.88
ENSBTAT00000000181	1.98527	1.4472	1.59097	1.35789	0.947476	1.37586	1.76196	1.33039	2.20107	0.813001	0.587466	0.871961
ENSBTAT00000000184	1.91301	1.6985	1.54253	3.77052	2.59716	2.53933	1.20545	1.68224	1.13737	2.38404	2.58707	2.44199
ENSBTAT00000000186	6.23544	5.94429	5.9144	5.63941	5.41728	5.49972	6.17114	5.27797	6.09917	4.96768	5.28537	4.93381
ENSBTAT00000000187	8.80331	6.93101	6.39765	7.05075	6.86478	7.20635	7.4496	5.24506	7.02907	5.20323	5.40041	4.50445
ENSBTAT00000000194	0	0	0	0.615	1.05913	0.569278	0	0.0569149	0	0.868454	1.16782	1.1096
ENSBTAT00000000195	0	0.237096	0	0.119285	0.720608	0.723306	0.227875	0.087473	0	0.614896	0.914144	1.70492
ENSBTAT00000000198	4.63275	4.22476	4.29968	3.81314	3.31169	3.09086	3.58902	3.52562	3.85295	2.11053	2.02522	1.45821
ENSBTAT00000000200	2.52569	2.48476	2.32047	3.23035	3.32696	3.5581	3.09897	2.97542	2.7278	3.26978	3.18901	2.88692
ENSBTAT00000000201	5.30204	5.3981	5.3586	5.38232	5.48	5.51131	5.47959	5.60399	5.55252	5.90619	5.83865	5.67362
ENSBTAT00000000204	0.851078	0.895583	1.25575	0.692143	0.875797	0.151769	1.18137	1.54409	1.47098	1.17719	1.5644	1.2034
ENSBTAT00000000206	1.55278	1.49209	1.58758	0.464571	0.695632	1.0638	1.00745	1.14233	1.11584	0.77001	0.219144	0.817812
ENSBTAT00000000207	4.42086	4.29503	3.77268	3.47892	3.24336	2.978	3.8196	4.24832	3.99049	3.93954	4.51763	3.9944
ENSBTAT00000000209	0.0348359	0	0	0.0971112	0.181801	0.329157	0.150331	0.0835583	0.138586	0.563937	0.453997	0.258422
ENSBTAT00000000210	2.28026	2.28866	2.27236	3.30338	3.14207	3.01042	2.64782	3.3713	2.77134	3.40071	3.4883	3.50136
ENSBTAT00000000211	3.29605	3.27266	2.97741	3.3001	3.71784	3.63262	3.33975	2.95396	2.912	2.97582	2.34655	2.914
ENSBTAT00000000213	1.73627	1.5639	1.15269	0	0	0	2.44127	2.81208	2.40372	0	0.140889	0
ENSBTAT00000000217	5.88881	5.93849	6.22592	5.29446	5.63583	5.08815	5.86821	4.98967	5.75718	4.8409	4.40402	5.03305
ENSBTAT00000000218	0.627214	0.554023	0.464445	0.528468	0.812032	1.36118	0.521874	0.342482	0.526026	1.12412	0.89993	0.840608
ENSBTAT00000000230	1.37478	1.89612	1.66317	2.19825	2.85154	2.75624	1.33976	1.5378	1.1847	0.638906	1.2792	1.50631
ENSBTAT00000000233	2.89085	0.0099263	0.0110266	0.00685534	0.00598064	0.0075299	3.01583	0.00953052	2.90485	0.00834697	2.47711	0.00785169
ENSBTAT00000000236	0	0	0.494357	0.512967	0	0	0	0	0	0.778505	0.253361	1.65492
ENSBTAT00000000237	2.31156	2.2141	2.74344	2.18723	1.70512	1.31993	2.32772	1.97914	1.81093	2.57379	2.14083	2.6944
ENSBTAT00000000240	6.4281	6.36525	6.22874	6.85723	6.86163	6.03055	6.83647	6.31307	6.53255	6.15916	6.02953	5.97849
ENSBTAT00000000242	0.944601	0.00249911	1.58085	1.59143	0.206253	2.04352	2.52089	2.61935	2.74982	2.60488	2.45223	2.65097
ENSBTAT00000000244	3.60164	3.07645	3.33544	6.39458	6.40312	6.4739	4.62299	4.502	4.54547	6.04089	6.03545	7.32129
ENSBTAT00000000246	1.85392	2.11936	2.10473	1.58104	1.59406	1.02781	3.51913	2.93675	3.31919	2.33911	2.36957	2.25084
ENSBTAT00000000253	4.13861	4.05682	3.99174	4.73934	4.73718	4.63349	4.61321	4.66551	4.67579	4.78357	5.12552	4.9652
ENSBTAT00000000254	2.88961	3.19642	2.98259	3.4611	3.21444	3.07288	3.13475	2.74843	2.7966	2.85003	3.06281	2.72222
ENSBTAT00000000256	0.658788	0.550294	0.692818	0.398485	0.418259	0.192257	0.0610512	0.459599	0.461373	0.232457	0.583715	0.416083
ENSBTAT00000000257	3.6119	3.66018	3.61502	5.0242	4.96143	4.46721	3.97701	4.22783	4.05143	6.32751	6.30469	6.42193
ENSBTAT00000000259	5.27991	5.15229	5.15613	6.14801	5.95342	5.35563	5.01586	5.52438	5.50629	6.1917	6.53923	6.72083
ENSBTAT00000000263	0.0246086	0	0	0.0279303	0.227957	0	0	0	0	0.0675312	0.0524272	0
ENSBTAT00000000265	3.70651	3.37298	3.52177	3.27389	3.13931	3.68154	3.95016	3.55566	3.71236	3.59522	4.07559	3.3526
ENSBTAT00000000271	0	0.0254901	0	1.79586e-05	1.57276e-05	0.551411	3.54053e-05	2.46931e-05	3.09184e-05	0.148689	2.35156e-05	2.0066e-05
ENSBTAT00000000276	5.2627	5.04044	4.84788	3.44176	3.13539	3.08831	4.38894	4.79749	4.43143	3.22154	2.8208	3.36887
ENSBTAT00000000282	5.1678	4.86001	5.08655	3.64976	3.68361	3.75459	5.08644	4.55531	4.98445	4.1526	4.59388	4.06743
ENSBTAT00000000284	0.371068	0.703476	1.45305	0.0805109	0.440166	0.579694	4.46165	4.02419	4.19476	0.942918	0.530845	0.186295
ENSBTAT00000000289	5.96469	5.43351	5.41726	7.36958	7.25604	7.16497	6.10739	6.74481	6.14804	7.21491	7.58825	7.74321
ENSBTAT00000000291	0	0.555076	0.603181	1.12067	0.516975	0.801672	0.499749	0	0.173295	0.824036	0.534808	0.737966
ENSBTAT00000000293	0.387613	0.381125	0.278393	5.36019e-06	0	0	0	6.6846e-06	0.360961	0.0677918	6.38974e-06	6.3262e-06
ENSBTAT00000000294	1.99827	1.59183	2.09438	2.78572	2.37382	2.03117	2.60664	1.98679	2.44004	2.1355	2.43119	2.2315
ENSBTAT00000000299	5.30339	5.09988	5.17043	3.79927	3.67063	3.61423	3.95765	2.5042	2.47181	3.36929	2.53781	2.17488
ENSBTAT00000000301	5.42347	5.12104	5.3373	5.64465	5.58701	5.36839	4.7781	5.11058	5.32921	5.07075	5.74553	5.54228
ENSBTAT00000000304	2.22111	2.68877	0.665947	3.34021	2.48335	1.00858	3.3621	2.51338	2.26244	4.11819	3.75979	3.71232
ENSBTAT00000000305	1.13118	1.31901	1.25906	1.66275	2.02902	1.95095	1.00283	1.69303	1.06924	1.97948	1.8322	1.64345
ENSBTAT00000000306	0.000484302	0.000852084	0.000125868	4.99637e-05	3.80802e-05	2.0168e-05	0.000321232	0.000485889	3.67717e-05	0.000459265	7.86086e-05	1.05535
ENSBTAT00000000307	0.136131	0.0834415	0.206252	0.0497286	0.052167	0.0747702	0.254945	0.474007	0.451274	1.07033	1.31339	0.62433
ENSBTAT00000000314	2.49375	2.49526	2.43062	1.46953	1.94594	1.27842	3.29907	3.25545	4.51355	2.17144	2.92826	2.50734
ENSBTAT00000000315	4.33437	4.19212	4.26816	6.24178	5.8363	5.52394	5.64018	5.33188	5.76665	5.17936	4.52546	4.40372
ENSBTAT00000000316	5.08798	5.25062	5.14059	4.14079	4.63745	4.54849	4.92603	5.56659	5.65295	4.94515	5.50952	5.52313
ENSBTAT00000000317	2.48517	2.5068	2.75801	2.97263	3.03752	3.56005	2.52599	2.79095	2.76435	2.42618	2.95864	2.88949
ENSBTAT00000000321	0.445341	0.931442	1.00253	0.303058	0.713555	0.0788208	1.28562	0.893955	1.21548	0.32818	0.179064	0.205894
ENSBTAT00000000322	3.91649	2.61249	2.94033	2.37649	1.44451	1.26151	3.02624	2.25938	3.31238	1.25037	1.69152	1.56164
ENSBTAT00000000323	0.532991	0.12394	0.0698616	0.569061	0.622825	0.848752	0.173336	0.456074	0.160262	0.935464	0.799368	0.341905
ENSBTAT00000000325	2.42725	2.20166	2.42147	3.48353	3.44763	3.43593	2.95227	2.95297	3.05458	3.85086	3.03716	3.73064
ENSBTAT00000000331	3.13947	2.92222	3.25817	4.41757	4.50657	4.60618	4.08174	3.64874	3.62781	4.3745	4.27686	4.05709
ENSBTAT00000000333	3.42273	3.48105	3.42052	3.04063	2.86011	2.99751	3.37152	3.22631	3.39539	3.36215	3.56695	3.47024
ENSBTAT00000000335	2.31814	2.37471	2.29941	2.7916	2.75674	2.84137	2.44052	2.16471	2.68625	2.11097	2.63526	2.19514
ENSBTAT00000000337	0.893987	0.756186	0.885082	0.887657	1.31998	1.75332	1.20276	0.55895	2.03316	0.524454	0.640192	0.405118
ENSBTAT00000000339	0.426634	0	0.166416	0	0.19039	0.516881	0	0.157816	0	0	0.385979	0
ENSBTAT00000000341	4.58127	4.40934	4.51171	4.81326	4.542	4.02868	4.37293	4.63914	4.5406	4.92955	4.91321	5.21372
ENSBTAT00000000344	0.000104725	5.62041e-05	0.000277138	0.000223088	3.24663e-05	0.000110734	0.627187	7.84434e-06	0.652076	4.92581e-05	1.018e-05	4.12182e-05
ENSBTAT00000000348	0.867463	1.11635	1.35072	0.962485	1.18729	1.2553	1.2839	0.527496	1.11608	0.532121	0.681591	0.814601
ENSBTAT00000000351	0.292792	0.124876	0.137521	0.180009	0.235716	1.05129	0	0.134395	0.316445	0.497137	0.601442	0.972382
ENSBTAT00000000353	2.30152	1.96797	1.77232	5.3779	3.7152	3.11249	2.97953	3.82698	3.26395	4.08006	4.88397	5.35452
ENSBTAT00000000354	1.42799	0.957215	1.11375	1.74375	1.4599	1.76201	1.19286	0.326968	0.8948	1.09709	1.26416	0.217473
ENSBTAT00000000356	4.03206	3.9999	3.70911	3.9097	3.78501	3.25035	3.63376	3.25099	3.65415	2.71258	2.81379	2.52019
ENSBTAT00000000357	2.71025	2.95069	2.85306	3.87193	3.7363	3.30056	3.01463	3.16136	2.87196	3.55438	3.60362	3.26108
ENSBTAT00000000359	9.54731	9.44241	9.38473	2.12604	2.23404	1.71204	9.28408	7.63863	9.02934	2.58571	2.62329	2.70358
ENSBTAT00000000361	5.84097	5.73424	5.65173	3.91477	3.86578	3.3212	5.40029	4.92879	5.52149	4.12772	4.23202	4.20785
ENSBTAT00000000364	4.64433	4.0572	3.98999	3.99824	3.32188	3.41201	4.36445	4.06873	4.20003	3.7628	3.50326	3.71156
ENSBTAT00000000367	1.45384	1.24623	1.41952	1.48594	1.31712	1.13893	2.24868	2.3815	2.01788	3.0589	2.33017	3.02216
ENSBTAT00000000369	1.56912	2.11993	1.05502	2.92499	3.04512	3.07525	1.78445	2.06926	0.723021	1.36393	3.19864	2.75597
ENSBTAT00000000370	3.0984	3.25002	2.80801	3.1812	2.97022	2.82391	3.76361	4.27372	3.61562	3.32357	3.38461	3.43805
ENSBTAT00000000374	1.3533	1.1686	1.59857	1.99719	1.8961	2.39986	1.92279	2.27486	1.57169	2.9739	3.59685	3.67543
ENSBTAT00000000375	0.226531	0.300891	0.258424	0.632779	0.624121	0.702806	0.561303	0.812665	0.623981	0.221249	0.791921	0.469529
ENSBTAT00000000389	5.43982	5.24547	5.60951	7.74288	7.38952	7.40323	5.49422	5.56233	5.74868	8.09474	8.30537	8.46247
ENSBTAT00000000397	3.56671	3.85806	3.69607	4.21546	4.43338	4.25796	4.58969	4.30747	4.33123	4.7425	4.65101	4.7699
ENSBTAT00000000398	4.91967	5.228	5.14832	5.72408	6.78348	5.46664	5.6783	7.28419	5.78889	6.89195	8.00531	8.26171
ENSBTAT00000000401	0.328195	0.563958	0.588724	3.85724	3.85511	3.18845	0.0453757	0	0.84178	0.308619	0.474689	0.877832
ENSBTAT00000000407	2.86697	2.7871	2.62377	2.68213	2.99702	2.66629	3.95826	2.85619	3.55601	1.81368	2.0832	2.17938
ENSBTAT00000000410	2.94277	3.00813	2.96019	3.32626	3.24795	3.13981	3.55963	3.58758	3.98073	4.5917	4.50034	4.42257
ENSBTAT00000000413	3.93776	3.8797	4.1318	3.55952	3.72415	3.8614	4.63602	3.84451	4.84727	3.59464	3.47012	3.64446
ENSBTAT00000000419	0.670171	0.580241	1.09828	0.387094	0.285067	0.546002	0.460147	0.504369	0.638958	1.06813	0.493515	0.616838
ENSBTAT00000000422	2.75545	2.6291	2.71195	2.96651	3.16518	3.02462	2.80791	2.93712	3.03022	3.12108	3.38571	3.0982
ENSBTAT00000000433	4.43461	5.61372	4.94446	1.31471	2.01133	2.66108	1.80069	1.93302	2.86619	0.269366	0.623307	0.264425
ENSBTAT00000000434	1.79335	1.58693	2.02602	0.758059	0.557307	0.798233	2.33073	2.36893	2.65618	0.850487	0.647327	0.383849
ENSBTAT00000000437	3.33839	2.85906	2.56235	2.87867	2.63471	2.91004	2.88582	2.98376	3.29164	3.43968	3.72632	3.57841
ENSBTAT00000000445	5.23757	5.20914	5.13769	5.16105	5.2663	5.25816	5.04851	5.04768	5.17182	4.97766	5.27342	5.01511
ENSBTAT00000000447	3.09223	2.99809	3.29348	4.02938	4.16055	3.81551	3.21014	3.40687	3.15713	4.62387	4.48451	4.41741
ENSBTAT00000000448	5.1308	5.04222	4.61577	4.59608	4.47034	3.67117	4.57396	3.98473	4.08324	4.64597	4.40518	4.15071
ENSBTAT00000000450	0.527519	1.27375	1.26327	3.25405	1.70255	1.71613	0.723385	0.660064	1.04671	3.09624	4.14608	3.03491
ENSBTAT00000000453	3.7265	3.47353	3.75999	3.29966	3.39758	3.13677	4.05478	5.08633	4.80359	5.39971	4.74058	5.33338
ENSBTAT00000000456	1.20963	1.20143	1.68473	0.434871	0.752898	0.283721	1.77985	1.56002	1.5223	0.637779	1.03867	0.91844
ENSBTAT00000000459	0	0	0.14228	0.568334	0.74508	0.374911	0	0	0	0.597134	0.343452	1.32194
ENSBTAT00000000461	2.69438	2.56988	2.2197	1.16186	1.8181	1.03933	2.93393	2.01868	2.43076	2.12653	1.96672	1.84242
ENSBTAT00000000463	2.95087	3.22653	3.47177	2.9804	3.43519	2.4579	3.7045	3.26751	3.68224	3.35991	3.19143	3.28509
ENSBTAT00000000465	6.66908	6.2105	5.8771	5.42114	5.25965	5.2791	6.32931	5.98176	5.43823	4.26777	4.68844	4.71007
ENSBTAT00000000470	3.85016	3.75459	3.51458	3.99072	4.02077	3.8552	3.47805	3.21244	3.55955	3.10664	3.2109	3.2144
ENSBTAT00000000472	2.97014	2.86874	2.82146	2.49133	2.64589	2.38528	3.12142	2.55976	2.87376	2.69238	2.41609	2.92284
ENSBTAT00000000474	3.42469	3.5789	3.46733	4.02983	3.82137	3.96611	3.16301	3.22095	3.14267	3.05416	3.19735	2.9689
ENSBTAT00000000479	3.45588	3.90592	4.13095	5.08296	5.1929	5.24929	4.16394	4.15509	4.15731	5.07043	4.6882	4.75839
ENSBTAT00000000481	4.98895	4.68953	4.58339	4.20996	4.29508	4.0492	4.66517	4.6078	4.934	4.09956	4.5999	4.35232
ENSBTAT00000000482	1.2683	1.55522	1.69333	2.62206	2.81149	2.78348	2.20501	2.59554	2.45458	2.46596	2.42068	2.41093
ENSBTAT00000000484	0	0	0	0.555233	0.470992	0.0943932	0.168512	0.0636299	0	0.0545102	0.442728	0
ENSBTAT00000000486	4.50382	4.45322	4.56964	4.03576	4.02728	3.71809	4.58902	4.79999	4.5861	4.35624	4.78629	4.62199
ENSBTAT00000000488	0.909486	0.522526	0.604028	1.60407	0.744424	0.851566	1.12812	0.896151	1.06354	0.821147	1.48512	0.90915
ENSBTAT00000000490	3.38267	2.69671	3.33601	5.04674	4.53479	4.58105	4.20624	4.31084	3.93346	4.10115	4.41823	4.21902
ENSBTAT00000000491	2.88025	3.56752	2.18012	1.84431	1.56851	1.39478	3.96462	4.45934	3.6753	1.66889	2.52888	1.88067
ENSBTAT00000000492	0.387327	0.318865	0.0954557	0.393615	0.0560918	0.133133	0.341388	0.257207	0.317442	0.170172	0	0.0751305
ENSBTAT00000000493	3.60179	3.19835	3.46059	3.21021	3.32806	3.11753	5.15185	4.94367	5.08585	4.11989	4.61279	4.45458
ENSBTAT00000000497	7.09268	6.5629	6.66904	3.10629	3.17088	3.18715	5.89696	5.3515	6.35277	3.06455	3.12023	3.00884
ENSBTAT00000000498	3.46114	3.53925	3.57137	3.95765	3.84634	3.79162	3.84105	3.03569	3.35713	3.75582	3.42196	3.95811
ENSBTAT00000000499	2.08841	2.29798	2.19681	1.19433	1.56844	0.745768	2.52614	2.29903	2.7747	2.10478	1.89276	2.09236
ENSBTAT00000000500	3.50309	3.29717	2.72913	2.22927	2.29652	1.89745	2.40761	2.06369	1.83312	1.79873	1.92837	2.06018
ENSBTAT00000000502	3.16889	3.47399	2.84916	4.11314	3.95085	3.91886	3.02122	3.1186	3.12466	4.1862	4.82645	4.02196
ENSBTAT00000000504	3.03768	3.18873	3.18723	3.34141	3.5169	3.38234	5.23072	3.93647	6.03516	4.30402	4.1847	3.87808
ENSBTAT00000000506	6.60239	6.11285	6.0841	4.00718	3.29215	3.43163	5.81357	5.14945	5.30589	4.12762	4.00659	3.46496
ENSBTAT00000000507	2.37271	2.04567	2.27386	3.58682	3.03555	3.1925	2.60225	3.14403	2.32957	3.66126	3.98578	3.79941
ENSBTAT00000000511	4.53573	3.92297	3.75624	3.28027	3.21518	2.60436	4.34645	3.64968	3.27576	3.62102	3.53437	4.24051
ENSBTAT00000000513	0.317753	0.260682	0.28578	0	0	0.394287	0	0.404207	0	0	0.131099	0
ENSBTAT00000000518	4.28524	4.32408	4.42095	4.17797	4.49988	3.71307	4.82377	4.7246	4.8602	5.34718	5.38966	5.45437
ENSBTAT00000000519	3.56086	3.78271	3.76697	4.11574	4.00703	3.91272	4.73153	5.54454	5.01891	5.52232	6.02755	5.45139
ENSBTAT00000000526	2.49499	2.87192	2.75926	3.63	3.71747	3.47153	3.39712	3.47801	3.25153	3.3308	3.1567	3.19605
ENSBTAT00000000527	3.98556	3.88165	3.8799	3.73399	3.672	3.37986	3.97278	4.10249	4.23016	4.06336	4.01142	4.05371
ENSBTAT00000000528	0.18638	0.288949	0.166902	0	0.19822	0	0	1.15081	0	0.778708	0	0
ENSBTAT00000000529	0.140421	0.219262	0.347496	0.122095	0.240603	0	0.158986	0	0	0.0513179	0	0
ENSBTAT00000000533	4.80361	4.76542	4.36687	4.7733	4.66553	4.8107	5.26153	5.42501	4.92188	4.69101	4.93726	4.90173
ENSBTAT00000000534	1.46543	1.8926	1.88463	1.57815	1.38772	1.30423	1.12355	0.349502	1.02015	1.11732	1.17776	1.11155
ENSBTAT00000000538	0.682973	0.656726	0.366857	1.8765	1.31837	0.745004	1.6791	1.46535	2.30076	3.44822	2.38852	3.28182
ENSBTAT00000000540	0	0.042525	0.300581	0.253526	0.357643	0.096619	0.507507	0.166541	0.301541	0.0737362	0.076126	0.0708145
ENSBTAT00000000541	5.68309	5.77835	5.85937	5.21482	5.52514	5.33814	5.71729	5.41487	5.90252	4.76328	4.88644	4.87192
ENSBTAT00000000543	2.75904	2.70671	3.14824	2.03807	2.19762	1.87684	3.15872	3.29706	3.63785	3.13903	3.37629	3.05777
ENSBTAT00000000545	0.927057	0.851778	0.712515	0.497691	0.556352	0.251117	1.2673	0.756036	0.148355	0.284904	0.383238	0.436823
ENSBTAT00000000549	0.882645	0.963634	1.48637	1.33946	0.794616	0	1.79293	1.65177	1.10117	1.66092	1.23118	1.86216
ENSBTAT00000000555	0.555536	0.499796	1.07819	0.35076	0.615526	0.815567	1.60902	3.25952	1.93791	1.75174	1.21953	2.25722
ENSBTAT00000000556	11.2751	11.0102	10.1505	5.22117	5.7336	4.93208	12.3757	13.2633	12.031	6.62077	7.1531	8.28697
ENSBTAT00000000557	1.617	0.89319	1.59406	4.46285	3.71534	3.56211	2.26717	3.20808	1.68564	3.21004	3.1698	3.75095
ENSBTAT00000000558	3.27176	2.96599	2.98658	2.69214	2.56877	2.53402	2.65786	2.02013	2.57258	2.87916	2.07437	2.37854
ENSBTAT00000000560	0	0	0	2.75138	1.86427	1.54116	0	0.0945604	0	1.17976	1.81371	0.875701
ENSBTAT00000000561	5.81856	5.35347	5.19151	0.812458	0.451565	0.198991	5.85058	6.46412	6.14133	1.24041	1.91381	1.96597
ENSBTAT00000000563	3.29956	3.33365	3.49662	3.07635	2.99106	2.83034	3.1148	3.13065	3.34348	3.04822	3.04717	3.04564
ENSBTAT00000000564	0.487176	0.718348	0.715832	0.643293	0.320433	0.436661	0.877583	0.965493	1.24647	0.548167	0.444667	0.355671
ENSBTAT00000000566	3.12684	2.77209	2.3187	9.92234	9.22498	9.01811	5.86864	5.70638	5.61409	10.0529	10.3854	9.1206
ENSBTAT00000000568	3.10843	2.08801	2.27821	2.07265	1.72937	1.81471	0.076156	1.2505	0.805547	0.524164	0.53954	0.539604
ENSBTAT00000000569	0.498495	0.0925379	0.0348161	1.55901	1.43691	1.74914	0.0866807	0.0319973	0	0.206758	0	0.266501
ENSBTAT00000000570	1.78514	1.54244	1.55797	2.29703	2.62452	2.22112	1.78193	1.92698	0.914415	1.68	2.06854	1.53843
ENSBTAT00000000573	1.13784	0.776004	0.875291	4.44506	5.33797	4.08921	3.84122	4.67064	2.99181	4.21811	3.73382	3.60209
ENSBTAT00000000576	6.10954	6.18564	5.9747	4.06106	4.53514	3.76955	6.82119	6.38959	6.64256	4.52883	4.13745	4.67202
ENSBTAT00000000578	2.29657	1.64983	2.04866	2.78494	2.8618	2.38746	2.89772	2.97535	2.98335	3.02405	3.48954	3.75208
ENSBTAT00000000579	3.5712	3.70694	3.51427	3.91997	3.91846	4.05955	3.47234	2.76086	2.84973	3.33385	3.02971	2.7459
ENSBTAT00000000581	5.63017	5.6919	5.27568	6.11155	6.05506	6.15051	5.56609	5.71478	5.52058	5.66165	6.00208	6.03627
ENSBTAT00000000582	0.629508	1.05221	0.939432	0.276037	0.827899	1.09662	0.701958	0.38348	0.0896485	0.176097	0.0633676	0.544817
ENSBTAT00000000583	2.26555	2.16889	2.57456	2.44026	1.58108	1.49381	2.21441	1.87416	2.36383	2.12908	1.57884	1.6247
ENSBTAT00000000588	1.88843	2.16904	2.60126	0.975233	1.30794	1.0173	1.33656	2.12893	1.6814	1.8035	2.16294	1.24155
ENSBTAT00000000589	7.59111	6.65112	3.54482	2.94534	3.00324	1.67632	4.82305	6.14239	3.0789	3.84775	2.39325	3.16237
ENSBTAT00000000596	6.83056	6.77083	6.35736	6.62261	6.61093	6.51248	7.37414	7.3727	7.06652	5.82211	5.97318	6.05963
ENSBTAT00000000598	1.58451	1.92741	2.06159	2.48089	2.57038	2.74016	1.79916	2.36736	2.18164	2.47481	2.42603	1.91029
ENSBTAT00000000600	2.85125	3.28152	2.99553	3.36874	3.72582	3.40199	3.7427	3.86413	3.4948	3.13921	3.2248	3.05559
ENSBTAT00000000601	1.16773	1.50385	1.59977	2.17374	2.76054	2.31376	2.25228	2.67843	1.99933	2.7787	2.49266	2.84207
ENSBTAT00000000602	1.09565	1.01475	0.919335	0.730403	0.661823	0	1.15716	1.36217	1.1401	1.00231	0.76105	1.04292
ENSBTAT00000000604	0.551889	0.866135	1.28343	0.168951	0.880653	0.48883	1.59999	1.79176	1.48624	1.91336	1.68983	1.77469
ENSBTAT00000000605	2.65724	2.73134	2.51767	0	0	0	2.31575	2.13471	0	0	0	0.218409
ENSBTAT00000000606	3.43946	3.29502	3.41077	3.04115	2.98382	2.93639	3.54031	3.43419	3.63924	3.0296	2.77017	3.17563
ENSBTAT00000000607	3.11849	2.99406	3.27954	2.52433	2.15399	1.90749	3.22019	3.71453	3.98865	3.48764	3.39887	4.39467
ENSBTAT00000000611	3.43932	4.04873	4.16948	3.50418	3.51593	3.22169	4.12271	3.14767	3.42556	4.14746	4.03517	3.81529
ENSBTAT00000000612	2.5059	2.38464	2.35369	3.26715	3.06399	3.5706	2.73185	2.09167	3.14199	2.3922	2.67259	2.76585
ENSBTAT00000000617	0.608051	0.833387	0.676955	1.28516	0.387481	0.808743	0.682752	1.0957	0.563778	0.935814	1.15645	1.2003
ENSBTAT00000000619	1.12219	1.12979	1.14622	0.257884	0.405845	0.219889	1.29893	1.77881	1.38876	1.15628	1.48252	1.03627
ENSBTAT00000000626	0.80191	0.000239553	1.05744	1.40398	1.41266	1.59996	1.35331	2.51341	1.92358	3.13398	2.05735	3.23892
ENSBTAT00000000628	3.9114	3.86299	3.91347	3.84578	3.89531	3.91628	3.94404	3.63732	3.8805	3.57157	3.82987	3.38322
ENSBTAT00000000630	3.84365	4.0695	3.59291	3.43547	3.5233	3.40653	3.91031	4.18249	3.6159	5.61486	5.46852	5.71725
ENSBTAT00000000631	5.86413	6.12085	5.89297	2.4534	2.29056	2.00347	5.69654	5.69129	5.41989	1.26892	1.87793	0.773928
ENSBTAT00000000637	2.34355	2.28778	2.08821	2.33558	2.40164	2.21196	1.72482	1.39216	2.10291	1.33975	1.22308	1.91298
ENSBTAT00000000639	1.80153	1.66331	2.04229	3.00961	3.28005	3.09549	1.90232	2.09893	1.52253	1.57895	1.87527	1.88166
ENSBTAT00000000643	2.02239	2.05495	2.40769	3.58074	3.25062	3.37888	4.77348	3.53338	4.26662	4.24025	3.21953	4.42086
ENSBTAT00000000648	7.25309	6.2418	5.84304	5.82251	6.0795	5.80649	6.83426	4.01086	6.81999	4.71936	5.07898	4.37405
ENSBTAT00000000651	3.84971	3.96038	4.30797	2.85474	3.19244	3.45572	4.51674	4.31206	3.86566	3.67586	4.02437	4.04489
ENSBTAT00000000662	7.0104	6.99994	6.84001	2.49758	2.0029	1.49173	6.92026	6.25044	6.675	2.98572	3.39117	2.90151
ENSBTAT00000000669	1.163	0.484702	0.287845	1.05974	0.191045	0.220407	0.96289	5.20937	2.18731	0	0.506819	0.258736
ENSBTAT00000000670	0.247183	0.678587	0.661104	0.680149	0.196301	0.235091	0.52203	0.910146	0.380555	1.80879	1.88127	1.66302
ENSBTAT00000000673	0	0.237078	0	0	1.30492	0	4.06117	0	2.56353	1.62899	0.408709	0.383163
ENSBTAT00000000677	0.193029	0.0608433	0.0671563	0.0433579	0	0.077339	0	0	0.0262798	0.052971	0.0897547	0.0996205
ENSBTAT00000000679	2.2632	2.46528	2.41349	3.19658	3.70779	3.39562	2.51665	2.76399	2.63913	2.71301	2.72653	2.93423
ENSBTAT00000000683	1.87382	1.94815	1.45376	2.74744	2.89063	2.92264	5.18742	6.41022	5.53888	7.9116	6.37731	7.65948
ENSBTAT00000000686	3.91307	4.08969	4.13128	3.44069	3.56834	3.31315	2.95837	3.38023	3.47562	3.09257	3.06927	3.16996
ENSBTAT00000000687	2.92644	2.57592	3.0711	3.57359	3.7339	3.35316	3.38834	4.15701	4.36711	4.26667	4.43948	4.61185
ENSBTAT00000000688	5.3491	3.98933	4.41344	4.68561	4.533	4.62444	4.40068	3.93307	4.01342	3.81349	3.66985	3.67027
ENSBTAT00000000690	1.70868	2.55772	2.68753	2.44613	2.34244	2.65656	2.54194	2.29114	1.53908	2.58932	2.04609	2.71595
ENSBTAT00000000691	0.777471	1.28319	0.916979	0.935332	1.11961	1.2002	0.497178	0.927039	1.09586	0.441325	1.0814	0.99107
ENSBTAT00000000695	0.28608	0	0.17619	0	0	0	0.116793	0	0.390493	0	0	0.0712371
ENSBTAT00000000697	4.4131	3.9619	3.76569	2.61545	3.21508	3.01965	4.12434	4.09868	4.25899	4.15106	4.42146	4.0363
ENSBTAT00000000700	5.82081	5.76325	5.95252	4.20274	4.24175	4.17087	6.1324	5.55963	6.51632	5.44711	5.37139	5.55444
ENSBTAT00000000703	0.284235	0.0495756	0	0.0356342	0	0	0.318647	0.480268	0.0641227	0.127249	0.398287	0.0827703
ENSBTAT00000000704	0.0397151	0.0319575	0	0	0	0	0	0	0.0410286	0.0553119	0	0
ENSBTAT00000000705	3.5968	3.65116	3.23759	3.60368	3.9832	4.0505	2.94598	3.21908	2.87884	3.2831	3.69228	3.38691
ENSBTAT00000000709	4.95998	5.10218	5.05262	5.7947	6.00653	6.08634	4.72701	5.02112	4.89097	5.11482	5.27778	5.11476
ENSBTAT00000000714	8.29902	8.43001	8.46789	3.65867	4.26636	4.19999	8.25077	7.05045	7.96232	4.38202	4.27062	4.40926
ENSBTAT00000000718	4.51398	4.48144	4.49881	3.89055	4.11982	4.12882	4.36689	4.70199	4.62114	3.92608	4.19581	3.99869
ENSBTAT00000000721	8.18691	8.16008	8.18342	6.90846	6.79202	6.3358	8.71903	7.70232	8.1157	7.18534	6.74012	7.19934
ENSBTAT00000000722	3.97731	4.17726	3.97753	3.34505	3.47341	3.63811	3.96002	3.98354	3.79831	2.96035	3.05404	3.42048
ENSBTAT00000000730	6.36368	6.30116	6.16801	5.57653	5.86957	5.85166	2.71608	3.33268	3.03029	2.80208	3.05974	2.47915
ENSBTAT00000000731	3.98384	3.85721	3.62154	6.42127	6.40898	5.89719	4.21623	4.90687	4.12843	5.4306	5.47152	5.61964
ENSBTAT00000000732	0.982465	1.15448	1.21322	1.57161	1.49577	1.49397	1.68427	3.34947	2.25119	4.56397	3.82307	4.3071
ENSBTAT00000000733	4.14755	4.06889	4.19232	3.92968	4.00313	3.71212	6.85731	6.34224	6.39953	5.25584	5.37767	5.06504
ENSBTAT00000000734	0.993229	1.52313	2.32787	1.44417	1.49263	1.48338	2.18845	1.5714	2.75074	2.80066	2.77735	2.65942
ENSBTAT00000000735	1.59589	1.85351	2.02078	3.1198	3.17779	3.06193	2.92085	3.55452	3.47082	4.55269	4.40601	4.60039
ENSBTAT00000000737	0.901085	0.559181	1.1585	0.890377	0.733389	0.493698	0.477109	0.261818	0.656449	0	0	0
ENSBTAT00000000738	3.96266	3.37525	4.18763	2.97001	3.13082	3.19787	3.84965	4.09495	4.0747	3.25059	3.55652	3.21868
ENSBTAT00000000740	1.23261	1.35457	1.2916	1.5329	2.07377	1.93118	1.50387	1.69924	1.99792	1.67787	1.71721	1.3802
ENSBTAT00000000742	2.93528	3.01944	3.44408	3.28253	2.47326	2.53783	6.75853	3.85528	5.8172	3.12365	3.38932	2.70173
ENSBTAT00000000744	3.48643	2.93852	2.77906	1.16684	1.14567	0.201379	2.26834	3.81345	3.22162	0.990715	2.01862	1.29039
ENSBTAT00000000749	9.59992e-05	5.23841e-07	8.19775e-05	1.6723e-07	3.139e-08	2.12387e-13	2.33689e-06	3.57094e-07	0	1.84356e-08	8.74097e-07	0
ENSBTAT00000000752	1.09192	0.996721	0.853031	0.794478	0.888482	0.868777	1.81407	3.3825	1.31374	2.06005	0.970988	2.49979
ENSBTAT00000000753	0.938444	0.836677	0.0394664	1.18389	0.655029	0.606614	1.86624	4.35911	1.8496	1.31199	3.34431	2.59387
ENSBTAT00000000755	3.74974	3.79442	4.0621	3.6529	3.81107	3.57233	3.84843	4.13622	4.17953	4.30623	4.3014	4.40675
ENSBTAT00000000756	0.180177	0.118226	0.0665837	0.27788	0.340427	0.0234996	0.377646	0.722546	0.318781	0.755963	1.11844	0.651047
ENSBTAT00000000774	0.939779	1.21786	1.13212	2.04597	2.22555	2.21553	1.50792	2.24101	1.50789	2.64624	2.8144	2.82824
ENSBTAT00000000779	0.216721	0.0909843	0.194107	0	0	0	0.644606	1.1932	0.603574	0	0	0
ENSBTAT00000000780	1.3357	0.561755	1.13991	0.0696098	0.433336	0.847506	0.987511	2.17806	2.09207	0.74096	0.531267	0.615427
ENSBTAT00000000782	1.32485	0.905965	1.4511	0.197128	0.59847	0.212155	2.79906	4.0376	2.82887	2.07479	2.95407	2.37821
ENSBTAT00000000786	4.15605	4.04843	4.09834	3.56184	3.26423	3.34715	4.5972	4.12252	4.65327	3.91009	3.81914	3.8522
ENSBTAT00000000790	7.60031	6.66235	6.39525	7.51758	7.2477	7.15065	8.18066	9.25215	9.15849	10.9539	10.9154	11.0321
ENSBTAT00000000791	6.96857	6.8029	7.19612	6.77854	6.59741	6.8218	6.9437	6.66738	6.76514	7.10331	7.56046	7.06443
ENSBTAT00000000793	2.05996	1.77605	2.01748	0.22325	0.286563	0.137122	0.15748	1.90253	0.787059	0.0292882	0	0.0279891
ENSBTAT00000000795	3.53578	3.53686	3.96204	4.60808	4.56482	4.95213	5.30293	5.09398	5.17565	5.42226	6.15536	5.48843
ENSBTAT00000000796	0.117761	0.585462	0.294548	2.77752	2.367	3.13902	1.34022	2.53828	2.31787	6.2405	5.92619	5.82316
ENSBTAT00000000799	5.07943	4.79073	4.77885	3.78968	3.69263	3.46548	4.53493	4.90395	5.18841	3.4752	3.51426	3.73461
ENSBTAT00000000800	4.60119	4.66427	4.55915	2.96429	3.24598	2.55877	4.95601	4.8655	5.27882	4.02898	4.11488	4.15618
ENSBTAT00000000802	2.76635	2.8221	2.45351	1.75025	1.25676	1.7119	1.76113	1.05226	1.58635	1.30916	0.70457	0.666106
ENSBTAT00000000804	0	0.112693	0.704066	0.162049	0.276503	0.596488	0	0.120343	0.409502	0	0	0.192703
ENSBTAT00000000805	4.82966	4.69192	4.79669	4.57887	4.35962	4.0956	5.16351	4.98137	4.96751	4.4829	4.44337	4.44166
ENSBTAT00000000809	2.34628	2.31536	2.15603	2.50756	1.68013	1.88956	1.75729	2.15618	1.47308	2.03878	2.06813	2.3104
ENSBTAT00000000814	9.41263	9.37443	9.21633	9.63078	9.64751	9.79414	10.049	11.1884	10.7888	10.1752	10.8503	10.3859
ENSBTAT00000000816	0.0565752	0	0.0503422	0.156597	0	0.482085	0	0	0.169837	0.259683	0	0.0384983
ENSBTAT00000000819	0.803739	0.774652	0.412568	1.5635	1.60935	1.70432	0.339018	1.08183	0.619123	2.27912	2.45943	1.94461
ENSBTAT00000000821	0.288108	0.50339	0.875539	0.173126	0.700886	0.98538	0.380161	0.466549	0.94295	0.96612	1.06732	0.957632
ENSBTAT00000000824	2.02843	1.16111	1.24341	1.21224	1.8986	2.50952	1.79813	1.9445	1.60427	1.81251	1.99403	1.28936
ENSBTAT00000000829	0.895162	0.707162	1.31901	2.66727	2.26327	1.94916	0.112347	0.0823595	0	0.294732	0.303505	0.312139
ENSBTAT00000000830	1.10901	1.17918	1.29389	1.58345	1.78455	1.76373	0.720991	0.570583	0.880646	1.32329	0.767389	1.22039
ENSBTAT00000000831	5.76895	5.66942	5.73696	5.22132	5.38871	5.56706	5.1633	5.35054	5.13816	4.75971	4.95106	4.78181
ENSBTAT00000000833	1.05359	0.813891	1.15986	3.36529	4.52036	3.9685	1.4545	1.0334	1.66316	1.92212	1.69311	1.85521
ENSBTAT00000000837	0.352151	0.0523793	0.193015	0.336165	0.257604	0.191612	0.107802	0.357	0.0992566	0.536595	0.376882	0.517079
ENSBTAT00000000841	4.86648	4.93255	4.64977	5.37475	5.54953	5.19835	3.97453	4.9129	4.57634	4.51128	4.6015	5.21551
ENSBTAT00000000842	4.03069	4.10665	3.52695	4.67322	4.38789	4.62472	4.17174	4.24814	4.11565	3.76378	4.26024	4.37893
ENSBTAT00000000843	0.574816	0.783089	0.786478	1.19184	1.88589	2.62785	1.48345	2.15652	4.11296	2.85263	2.52849	2.38005
ENSBTAT00000000845	3.70115	3.61664	3.76476	2.91162	2.98722	2.58903	3.60694	3.7628	4.13097	3.68656	3.49244	3.51334
ENSBTAT00000000847	1.05506	1.56279	0	1.23855	0.553703	0	0	0.615169	0.408321	4.62307	4.42569	4.33187
ENSBTAT00000000849	1.83989	2.26968	1.92354	4.14539	4.30893	4.71706	3.01525	3.24213	2.8797	4.13894	4.35315	4.14057
ENSBTAT00000000851	3.00789	2.69738	3.07456	1.38298	1.45603	0.558246	3.51424	3.95663	4.45439	3.28204	3.42205	3.34864
ENSBTAT00000000852	3.35697	3.52133	3.04331	3.18754	3.14356	3.21528	3.20147	3.20794	3.02958	3.09552	2.90972	3.20398
ENSBTAT00000000853	2.80589	2.74491	2.84719	1.85427	1.72499	1.39361	2.39016	1.71388	2.12723	2.19973	1.78873	1.56591
ENSBTAT00000000855	1.12407	1.0159	1.28559	0.660375	0.366557	0.431078	0.976206	0.384144	0.800935	0.246181	0.332435	0.17054
ENSBTAT00000000857	0.534981	0.914158	0.626251	1.47454	1.86973	1.93917	1.48739	0.879357	1.91209	1.43131	1.55232	0.892192
ENSBTAT00000000858	1.856	2.37422	1.91326	2.19202	2.6151	2.60626	3.14815	3.24607	2.72516	3.38009	3.51666	3.53233
ENSBTAT00000000859	4.34142	3.25389	3.34714	1.27024	1.28464	1.01715	4.41625	4.27644	4.55256	2.67618	2.81679	2.79501
ENSBTAT00000000860	4.12065	4.24384	4.25827	3.24013	3.0822	3.17881	3.89563	3.80506	3.82983	3.22005	3.24786	3.17069
ENSBTAT00000000861	0.176592	0.196968	0.157803	0	0.108526	0.174502	0.370506	0.488369	0.312625	0.263491	0.24836	0
ENSBTAT00000000862	0.36975	0.269223	0.175918	0.273905	0.22071	0.604204	0.932321	0.378012	0.339806	1.00105	1.48748	0.69225
ENSBTAT00000000869	1.78843	1.49649	1.59215	2.67892	2.98373	1.97635	2.80752	2.27078	2.13374	3.89178	3.56128	3.75355
ENSBTAT00000000872	3.80992	3.73874	3.69649	3.23692	3.37246	3.20025	3.52409	3.8285	3.72227	3.57382	3.6585	3.5455
ENSBTAT00000000874	0.0719183	0.219262	0	0.27031	0	0.252006	0.0816816	0.0598742	0	0.483697	0.378582	0.57309
ENSBTAT00000000876	2.13081	1.85432	2.07557	2.14223	1.92551	1.30564	3.83437	3.04394	4.2203	3.48966	3.28284	3.45764
ENSBTAT00000000878	0.852621	0	0.0909573	1.56473	1.84679	1.94399	1.01003	2.53964	1.16732	2.33389	2.65419	1.86298
ENSBTAT00000000891	2.1886	2.10322	1.98768	1.80516	1.72674	1.24158	1.97757	1.39962	1.61875	1.71924	1.24452	1.44407
ENSBTAT00000000897	2.28826	2.18027	2.2148	1.90045	1.768	1.39284	2.66128	2.52172	2.53699	3.0962	2.5364	3.11699
ENSBTAT00000000901	10.2976	10.1321	9.78072	8.0224	8.02844	8.02199	8.88804	9.11222	9.06189	7.23544	7.49795	7.52633
ENSBTAT00000000902	1.98302	2.08928	1.3636	3.87559	3.70069	2.95632	2.85653	2.73647	2.69865	3.84456	3.61642	3.88621
ENSBTAT00000000906	2.84476	2.83912	2.82021	2.47398	2.58229	2.25848	4.00358	4.28355	4.04374	3.39093	3.29449	3.61847
ENSBTAT00000000909	5.30208	4.93001	4.66921	2.85246	2.53805	2.12934	4.69864	4.5959	4.80787	4.03348	4.36982	4.03922
ENSBTAT00000000910	2.89439	2.86999	3.03029	2.86883	3.16484	3.23996	3.44598	3.34441	3.53532	3.07189	3.13398	3.0981
ENSBTAT00000000917	5.25433	4.82176	4.67516	4.03777	4.27305	4.31408	5.3436	4.80199	5.2133	4.18277	4.33183	4.09844
ENSBTAT00000000918	1.76623	1.5018	1.40772	2.10333	2.42698	2.36742	2.05758	1.92817	1.25859	2.11537	2.64974	2.4565
ENSBTAT00000000919	2.4214	2.62788	2.09594	2.24053	2.61753	2.85863	2.94621	3.04053	2.87948	2.80765	3.33256	3.07371
ENSBTAT00000000923	1.09922	1.23368	1.1168	1.86492	1.9138	2.08105	1.16124	0.897579	1.05313	1.60326	1.431	1.27477
ENSBTAT00000000925	6.4823	6.23798	6.28711	5.65411	5.72576	5.73857	6.43088	5.90618	6.405	5.7611	5.92634	5.81117
ENSBTAT00000000926	5.85972	5.5573	5.86424	4.34147	4.54144	4.17276	6.17463	6.33337	6.30233	5.5575	5.59538	6.07085
ENSBTAT00000000927	5.70373	5.31525	5.31982	5.85993	5.71653	5.19533	5.97414	6.14976	6.19541	5.87886	6.27469	6.02036
ENSBTAT00000000929	4.60002	4.15036	3.6466	2.48764	2.61619	3.52038	2.93113	3.7687	3.10321	2.59945	2.22204	2.01008
ENSBTAT00000000930	4.07747	3.59359	4.01111	3.48765	3.17256	3.118	4.0805	4.3773	4.64898	3.51229	4.32405	3.96685
ENSBTAT00000000932	6.90903	6.66309	6.9438	0.0919691	0.0476503	1.97247	6.20284	6.55931	6.08263	0.0570134	0.048995	0.0896508
ENSBTAT00000000935	3.97273	4.03879	3.78343	6.36509	6.28593	6.10357	4.76438	4.72382	4.72096	5.82348	6.15136	5.64361
ENSBTAT00000000937	0	0.100714	0.180534	0	0.202261	0.0525792	0.139489	0.258421	0.320353	0.847896	0.20421	0.0288041
ENSBTAT00000000938	2.85026	3.09923	2.78427	3.32412	3.4688	3.47244	2.5798	2.2198	2.12619	2.94611	2.86889	2.59849
ENSBTAT00000000941	2.38982	2.32412	2.10758	3.48197	3.69188	3.41006	2.54296	3.23737	2.99829	4.55807	3.89411	4.30706
ENSBTAT00000000943	4.4295	4.65188	4.61075	5.96443	5.47317	5.64515	5.54052	5.42527	5.40921	6.39128	6.11174	6.28563
ENSBTAT00000000944	5.5897	4.12263	3.79961	6.80476	6.82273	6.7663	5.64909	4.62643	5.59253	5.46831	5.25336	4.63946
ENSBTAT00000000946	0	0	0	0.196883	0	0.144174	0	1.67728	0.123482	0.679538	0.248606	0.950239
ENSBTAT00000000950	4.54911	3.76164	3.67844	5.64698	5.3481	5.34459	4.01229	4.79563	4.10412	5.45434	5.96815	6.04437
ENSBTAT00000000955	1.4912	1.45114	1.31336	1.06451	1.51467	1.03353	0.111294	1.30075	1.65202	1.95968	2.48763	2.41416
ENSBTAT00000000956	3.84823	3.68309	3.65426	4.54288	4.41624	4.76158	4.23941	4.31458	4.07117	4.4542	4.21917	4.48151
ENSBTAT00000000957	1.54479	1.29373	1.5349	2.40541	2.46977	1.67128	2.21062	2.01843	2.68077	3.24452	3.65632	3.72711
ENSBTAT00000000958	0.0341006	0.157249	0.0599956	0.0195249	0.115849	0	0.0382425	0.027783	0.13572	0.0705795	0.119215	0.0676079
ENSBTAT00000000963	2.51053	2.79175	2.65386	2.70789	2.82608	2.78205	2.98843	3.00717	2.94266	2.75694	3.37626	2.91656
ENSBTAT00000000967	1.84692	2.10859	1.84021	1.94661	1.92229	2.07814	2.4	2.28673	2.54172	2.19563	2.2961	2.23506
ENSBTAT00000000969	2.61936	2.76731	2.76421	2.63412	2.63027	2.2752	3.06204	3.05945	2.97187	2.58827	2.70492	2.48232
ENSBTAT00000000971	0	0	0	0	0.0507778	0.432983	0	0	0	0.201521	0.208899	0
ENSBTAT00000000973	3.65099	4.20796	4.96467	0.0934592	0.113875	0.491329	3.92811	2.7668	4.09866	0.219303	0.204521	0.0664334
ENSBTAT00000000977	1.4976	1.80735	2.70726	2.31701	2.18368	2.60968	1.53181	2.73475	1.26212	2.87535	1.04587	1.98914
ENSBTAT00000000982	1.91281	1.90341	1.56423	2.79015	2.85131	2.34566	1.69875	2.60696	1.95539	3.07976	2.88115	3.03309
ENSBTAT00000000988	3.94944	2.77375	2.88095	4.23573	4.40916	4.52049	4.00122	4.0968	4.05577	4.62619	4.87419	4.7202
ENSBTAT00000000989	4.43866	4.26073	4.2765	4.11235	3.75262	3.50741	4.60986	4.29588	4.7165	4.2929	4.16869	4.36049
ENSBTAT00000000991	4.42511	4.76628	4.75278	4.41404	4.61887	4.46846	4.88583	4.94581	4.88294	4.50062	4.72068	4.49468
ENSBTAT00000000992	2.77428	2.44398	2.34557	3.04538	2.78629	2.93583	2.85093	3.59254	2.63955	2.0075	2.64165	2.94668
ENSBTAT00000000993	4.47871	3.55799	3.40402	5.8693	6.97384	6.27234	6.27042	6.56453	5.62305	4.26743	5.68986	4.99763
ENSBTAT00000000994	5.54702	5.30852	5.75465	6.69091	6.67114	6.58447	5.19769	5.23657	6.24033	6.07229	5.88416	5.98802
ENSBTAT00000000995	0	0	0.0741906	0.0958135	0.736565	0.705183	0.0949337	0	0.087618	0.276619	0	0.0576007
ENSBTAT00000000997	0	0.447672	0.56848	1.15013	0.555985	1.58475	0.276167	0.10744	0	0.258787	0.269014	0.817364
ENSBTAT00000000999	0.540544	0.169389	0.35604	0.886778	1.14542	1.15999	0.362028	0.0711077	0.0815626	0.885783	0.406454	0.734207
ENSBTAT00000001000	2.55414	3.00336	2.5133	2.18421	2.43996	2.3332	3.21962	3.41156	3.17757	2.55229	2.88773	2.9063
ENSBTAT00000001001	0.130628	0.292564	0.336804	0.671278	8.04785e-05	3.35496e-05	2.4577e-06	0.266734	0.000118949	6.84381e-07	2.4708e-06	0.0425453
ENSBTAT00000001006	2.57234	2.70668	3.20146	3.09089	2.83943	2.92649	2.45306	2.48773	2.32498	3.44157	2.70913	3.15795
ENSBTAT00000001007	5.83247	5.59485	5.88283	4.78821	4.15844	4.37519	6.15669	6.3608	6.23385	5.7627	5.7412	5.49685
ENSBTAT00000001013	3.07639	2.83305	2.90989	3.30249	2.94772	2.37792	2.76353	3.24828	3.33857	3.71696	3.7672	3.69853
ENSBTAT00000001018	5.3351	5.09726	4.74868	4.4837	4.31435	4.47341	5.1591	4.45759	4.88462	4.344	4.22195	4.17013
ENSBTAT00000001019	4.71387	4.26598	4.50238	3.08073	2.55231	2.29101	4.50785	3.19573	3.8832	3.08654	2.89874	2.55806
ENSBTAT00000001024	1.8866	1.73184	1.50928	1.38757	1.35942	1.46933	3.40701	3.86639	3.76897	2.7786	2.85134	2.73129
ENSBTAT00000001034	7.33144	7.00714	7.29002	7.69764	7.69718	7.61726	7.75507	8.46582	8.31442	7.58955	7.6014	7.76783
ENSBTAT00000001038	4.14819	3.98308	4.39734	5.74736	6.27542	6.31566	5.57817	4.72553	4.97346	5.27195	5.46919	4.97003
ENSBTAT00000001039	2.73678	2.8728	2.84186	3.58596	3.89903	3.609	2.85883	3.01604	3.40431	4.76266	4.44055	4.42573
ENSBTAT00000001040	3.8883	3.98795	3.8388	3.53776	3.65626	3.42855	4.0131	3.40002	3.43002	3.48206	3.3003	2.99618
ENSBTAT00000001044	0.31908	0.452966	0.376479	0.653243	0.534789	0.442641	0.617641	0.48613	0.610372	0.906451	0.79542	0.750793
ENSBTAT00000001045	4.02498	3.89301	4.22733	3.69352	3.42836	3.38439	3.97012	4.01917	4.31351	3.69409	3.78102	3.68874
ENSBTAT00000001047	3.01135	3.13307	3.17774	2.20357	2.12744	1.78035	2.85115	2.53064	2.89345	2.68424	2.0705	2.25757
ENSBTAT00000001048	0.0912497	0	0.158331	0.249879	0.222756	0.268012	0.867779	0.149765	0.69739	0.188757	0	0
ENSBTAT00000001052	1.34377	1.47131	1.51396	2.11967	2.37651	2.61113	1.01953	1.47672	1.92278	2.03942	3.06669	3.23636
ENSBTAT00000001054	4.97271	4.97679	5.17274	4.74061	4.90859	4.53974	6.48148	6.39898	6.57751	5.80846	6.01854	5.94261
ENSBTAT00000001057	1.85121	1.8398	1.63651	4.0042	3.65715	3.68865	1.71221	1.67514	2.61176	3.48599	3.60579	3.25437
ENSBTAT00000001061	1.97041	2.31368	1.55238	2.95386	3.38215	3.10442	2.65419	3.96572	2.34861	3.04418	3.21221	3.97735
ENSBTAT00000001063	3.06655	5.19191	4.63915	2.26982	2.18731	2.10449	2.76518	2.79819	2.49667	2.44941	2.93279	2.01296
ENSBTAT00000001064	2.80995	2.75388	2.74688	2.78835	2.65432	3.23276	2.3455	2.98993	3.13913	2.68814	3.24401	2.80098
ENSBTAT00000001066	5.59257	5.58075	5.57522	5.29274	5.39063	5.26673	5.80036	4.90337	5.22292	4.67295	4.56259	4.71931
ENSBTAT00000001068	2.74205	2.28503	1.74944	3.79491	4.07715	3.60002	2.29263	3.28302	2.21901	4.9379	4.52317	4.43874
ENSBTAT00000001069	6.10832	6.54148	6.50845	4.2278	6.28504	6.44704	7.65337	6.93478	6.92269	5.86194	5.90463	5.92521
ENSBTAT00000001070	0.0829421	0.0669691	0	0.0485056	0	0	0	0.135794	2.56706	0.706149	2.9657	1.67375
ENSBTAT00000001071	4.94761	4.43572	4.70888	4.36787	4.41867	3.92689	5.23571	4.91924	4.9819	5.47584	4.97511	5.03425
ENSBTAT00000001076	4.42971	4.43811	4.74345	2.53562	2.66441	3.04771	4.45506	4.20813	4.31344	4.01519	3.91168	3.66096
ENSBTAT00000001080	2.19552	1.73908	1.86011	2.58047	2.35284	3.10962	2.81157	2.61396	2.54587	3.67688	3.12787	3.06485
ENSBTAT00000001081	1.58578	0.724609	1.32135	3.33266	1.13046	1.0613	2.00272	2.5461	1.78847	2.65024	2.32165	2.58261
ENSBTAT00000001083	0	0.242028	0.418724	0.121946	0.475173	0.307856	0.433239	0.173761	0	1.0991	0.886651	1.03687
ENSBTAT00000001085	1.82569	1.7392	2.01622	2.05199	1.87652	1.88577	1.52451	1.38066	1.31892	1.42549	1.25921	1.10076
ENSBTAT00000001086	3.99996	4.12141	4.56026	3.70091	4.06837	3.90881	6.72848	6.19127	6.2543	5.8608	6.47907	6.09975
ENSBTAT00000001087	0.313511	0.256886	0.147692	0.316834	0.667277	0.105376	0.18781	0.204118	0.656281	0.175816	0	0.414813
ENSBTAT00000001088	6.00026	5.9481	5.9088	5.41184	5.10053	5.91435	1.56138	1.81625	2.50732	1.24955	2.17201	1.90841
ENSBTAT00000001090	2.65956	2.77138	2.82204	2.57669	2.15404	1.63006	2.97192	2.50053	2.46809	2.89334	2.78885	3.28506
ENSBTAT00000001091	4.5077	3.97442	3.72701	2.52727	2.17876	2.06224	3.42103	3.65188	4.42201	2.83216	2.83242	3.6433
ENSBTAT00000001093	5.03309	5.09338	4.80904	5.33404	5.24389	5.40574	4.77773	5.06397	4.81922	4.83525	5.38444	5.03102
ENSBTAT00000001094	4.1271	4.00755	4.01194	3.7219	3.67147	2.67537	3.95664	4.50359	4.29633	2.58971	1.68299	0.891618
ENSBTAT00000001095	0.545326	0.886046	1.0713	2.39968	2.9211	3.00366	1.13794	1.14668	1.25831	2.80158	2.64923	2.92842
ENSBTAT00000001096	2.19176	2.58859	2.34611	3.39422	3.48971	3.26192	2.13596	2.68193	1.96706	4.40344	3.79137	4.3518
ENSBTAT00000001098	4.36335	3.98715	4.011	5.60307	5.59395	5.47623	4.88273	5.73476	5.24575	5.98746	6.8407	6.56462
ENSBTAT00000001099	2.26009	2.06488	1.76009	3.08611	2.99033	3.02537	1.84874	1.41801	1.40937	1.29996	1.5194	1.36964
ENSBTAT00000001108	0.530417	1.41396	2.1863	0.774316	0.459717	0.0859918	1.74887	1.66294	2.87971	1.1065	2.54819	0.798566
ENSBTAT00000001113	5.09046	5.00945	5.05987	4.59956	4.68185	4.25617	4.88431	4.72398	5.08161	4.56792	4.83479	4.79088
ENSBTAT00000001114	1.5483	2.24558	2.40369	1.59129	1.78233	1.70322	2.39785	2.98332	2.94333	2.80826	2.68483	2.54585
ENSBTAT00000001118	1.07379	0.29859	0.661194	1.15095	1.02279	1.1659	0.405641	1.79014	0.856065	1.44919	0.803669	1.67248
ENSBTAT00000001120	0	0	0	0.749041	0.369134	1.32516	1.65506	1.97967	1.71876	0.241741	0.215206	0.320568
ENSBTAT00000001121	8.20338	8.18972	8.02775	6.17226	6.0118	5.82493	7.30316	7.1439	8.27372	6.47277	6.95279	6.71071
ENSBTAT00000001128	7.27166	7.30581	7.02972	5.14653	4.7728	4.7828	5.73334	6.301	6.41836	4.96496	5.79516	5.41929
ENSBTAT00000001130	4.91244	4.84518	5.01256	4.50711	4.46431	4.27451	4.86918	5.20148	5.271	4.86937	5.09993	4.98749
ENSBTAT00000001132	3.33676	3.56468	3.47325	3.86095	3.91624	4.21366	2.98693	3.05203	3.28771	4.07717	4.34525	3.84409
ENSBTAT00000001137	0.187718	0.483588	0.0982588	0.371339	0.856826	0.488989	0.756715	0.366976	0.760575	1.38171	1.21797	1.15765
ENSBTAT00000001140	5.69029	5.09538	4.88864	2.71937	2.77238	2.96568	5.60474	5.7671	5.74432	3.26493	3.89904	3.17635
ENSBTAT00000001141	1.02484	1.30075	1.33998	0.327934	1.11997	0.28039	0.836221	1.3037	1.37831	1.05735	1.03368	1.43853
ENSBTAT00000001142	2.1971	2.15895	2.19985	1.91134	1.66654	1.57684	2.44662	2.14429	2.40372	2.52342	2.20737	2.17504
ENSBTAT00000001146	3.72278	2.43869	2.61407	1.57841e-08	3.23275e-08	3.09477e-08	1.36341	2.72278	2.07083	0.0678115	0.0702052	0.282411
ENSBTAT00000001147	2.30375	1.95988	1.7857	2.35693	2.10126	2.43787	2.24134	2.96107	1.75123	2.73843	2.41937	2.75946
ENSBTAT00000001155	0.0984111	0.360041	0.460765	0.61612	0.845376	1.01231	0.921752	0.776019	0.925265	0.854577	1.14253	0.52516
ENSBTAT00000001156	1.26205	1.60495	1.54239	1.38885	1.53001	1.37686	1.43206	1.19218	1.4707	1.48188	1.6607	1.44934
ENSBTAT00000001158	3.52928	3.98643	3.68971	3.62294	3.73415	3.48339	4.0776	4.20773	4.09582	4.15271	4.26917	4.28265
ENSBTAT00000001161	0.220622	0.155296	0.299227	1.79099	1.9324	2.37228	0.482939	0.488405	0.226914	1.97047	2.21875	3.71183
ENSBTAT00000001164	2.58869	2.15006	2.72871	3.95416	3.97895	3.77821	4.19272	3.76181	4.01901	4.10508	2.32235	4.834
ENSBTAT00000001166	1.50917	1.66178	1.73517	1.1221	1.08992	0.959084	1.25813	1.71017	1.68026	1.17409	1.73473	1.38331
ENSBTAT00000001167	2.78322	3.06861	3.2481	2.01914	2.08499	1.06648	1.91122	1.49692	3.20222	1.9907	1.86756	2.25838
ENSBTAT00000001168	4.97816	5.02148	4.77641	3.25861	3.41862	3.0607	3.35826	3.53556	2.94199	2.39157	2.0994	1.86882
ENSBTAT00000001169	5.58098	5.61213	5.41883	4.58853	4.62671	4.68832	4.94686	5.03796	4.93194	4.22004	4.35953	4.33618
ENSBTAT00000001170	4.53136	4.54619	5.04405	5.88265	5.39645	5.72119	5.66274	5.73354	5.74716	6.02235	5.83639	5.74789
ENSBTAT00000001172	4.36898	4.1861	4.19127	3.56893	3.69762	3.53921	4.17605	4.44102	4.49207	3.69565	3.91631	3.74629
ENSBTAT00000001176	2.12871	2.17975	2.05541	0.876338	0.718124	1.06385	0.756935	0.20266	0.817356	0.557403	0.341298	0.456174
ENSBTAT00000001184	0.155485	0.126135	0	0.811858	0.490986	0.916082	0.475379	0.692258	0.504959	1.03643	0.627568	1.14215
ENSBTAT00000001187	9.72674	9.52474	9.72937	7.46188	7.56387	7.36664	8.04407	7.30057	7.37708	6.72382	6.30913	6.9255
ENSBTAT00000001188	6.26541e-06	9.71552e-07	1.24068e-05	4.21882e-06	5.62321e-06	7.08103e-07	3.03921e-05	0.000516521	1.36111	3.8911e-06	0.360304	9.38759e-05
ENSBTAT00000001189	1.70862	1.55987	1.49937	2.45138	2.288	2.34296	1.66281	2.84281	1.91393	3.04556	4.20783	2.44987
ENSBTAT00000001190	1.72538	1.09945	1.4128	2.57465	2.56852	2.37548	1.9917	3.03664	1.89967	3.87259	4.20574	3.8113
ENSBTAT00000001191	2.47965	1.77685	2.1769	4.3181	4.48522	4.11916	2.54581	2.84278	2.18751	3.51721	3.08633	3.52233
ENSBTAT00000001193	2.11683	2.75887	2.50707	3.30104	3.46661	3.95421	2.9471	3.42604	2.82283	3.11629	3.34653	3.05471
ENSBTAT00000001199	0.194021	0.46416	0.487037	0.587904	0.526821	0.490954	0.272003	0.585277	0.509112	0.0999336	0.306221	0.380497
ENSBTAT00000001200	0.575108	0.551238	0.820828	1.21155	1.2481	1.19593	0.864153	0.848415	1.04908	0.995791	1.70798	1.35901
ENSBTAT00000001202	0	0	0	3.81096	3.66181	3.63875	0	0.474707	1.12261	3.4636	2.76231	2.88786
ENSBTAT00000001205	4.30152	4.26768	4.29503	4.94393	4.70245	4.93262	4.79667	4.80822	5.07772	4.47279	4.40708	4.75792
ENSBTAT00000001208	8.87703	8.85411	8.80938	7.10362	7.58959	7.15141	9.42809	8.0508	8.86355	7.59453	7.17992	7.53442
ENSBTAT00000001212	1.59043	1.5514	1.92653	1.95277	2.29707	1.73233	3.07282	1.95809	1.98394	2.8243	2.26857	2.6319
ENSBTAT00000001214	1.15073	0.9656	0.909492	2.19024	1.47063	2.03594	2.66893	1.23222	1.64151	1.15508	3.54652	1.54027
ENSBTAT00000001218	2.64637	2.37315	2.79011	2.77964	2.66065	2.6863	2.1889	3.34867	2.51547	4.39248	3.81885	3.93948
ENSBTAT00000001224	2.73612	2.12522	2.54101	2.39511	2.88207	2.62992	2.27745	3.59879	2.91179	3.97133	4.73992	4.12885
ENSBTAT00000001235	0.221376	0	0.212806	0	0.398996	0	0.184708	0.136875	0.32365	0.520312	0.348424	7.00466e-05
ENSBTAT00000001237	4.73558	4.59742	4.7457	3.23348	3.1661	2.65086	4.5955	4.70624	4.57466	4.35632	4.02297	4.30741
ENSBTAT00000001238	0.606888	0.879869	1.05958	0.0716837	0.444892	0.410843	0.266189	0.103272	0.356627	0.758711	0.17783	0.242326
ENSBTAT00000001241	3.0951	3.34261	3.51251	4.24011	4.18865	4.55753	3.71004	3.62176	3.63981	4.22602	4.53984	3.98058
ENSBTAT00000001242	2.57869	2.38469	2.84925	2.45309	2.36291	2.09125	2.60989	2.8684	2.68777	2.19875	2.25955	2.60318
ENSBTAT00000001245	3.92969	4.07311	3.91411	3.37426	3.44879	3.10657	4.61295	4.09279	4.2034	3.70426	3.75342	4.05542
ENSBTAT00000001246	6.11067	6.08749	5.82188	4.123	4.38395	4.12748	6.40833	6.28845	6.33723	5.12504	4.98838	5.5333
ENSBTAT00000001247	2.06054	2.26021	2.31063	1.77146	1.94302	2.26039	2.50152	2.58093	2.66337	2.18598	2.38336	2.11342
ENSBTAT00000001248	2.32219	1.83062	2.29453	2.51998	2.14797	2.35408	2.48745	2.00635	2.05399	3.10853	3.27438	2.77679
ENSBTAT00000001250	0.977285	1.27403	1.47062	0.865887	1.14936	1.338	1.49785	1.99606	1.38904	2.55068	2.31868	2.81664
ENSBTAT00000001252	1.56455	1.6685	2.01521	1.75574	1.74884	1.82459	1.33106	2.09337	2.00719	2.9015	2.53061	2.21797
ENSBTAT00000001253	5.74478	5.71766	5.73168	6.64691	6.01281	5.85021	6.42725	6.18381	6.70654	5.68835	6.17092	6.05267
ENSBTAT00000001254	2.68972	2.80353	2.87518	2.81742	2.72205	3.16574	2.68146	2.23533	2.69117	2.33561	2.40989	2.5615
ENSBTAT00000001255	6.45731	6.33607	6.28048	4.29124	4.34886	3.92026	6.46431	5.72344	6.06955	4.83559	4.34747	4.69817
ENSBTAT00000001262	0	0.286924	0.314289	0.811382	1.10986	0.789925	0.109439	0.0806807	0	0.134781	0.384334	0.0666332
ENSBTAT00000001264	3.01429	3.30297	3.17795	2.77325	3.19736	3.10173	2.74604	2.98319	3.07712	2.89422	2.79728	2.8704
ENSBTAT00000001266	3.0584	2.81315	2.66814	3.73345	3.1574	2.98826	3.60285	2.89324	2.72681	2.98064	3.1179	3.29759
ENSBTAT00000001267	0.479418	0.430854	0.395051	0.18342	0.727168	0.257597	0.95414	0.332537	0.797866	0.187513	0.193421	0.246722
ENSBTAT00000001268	1.56632	2.0636	1.78166	0.704521	0.902713	0.369393	1.8205	1.64529	1.71651	1.14762	1.0797	1.18436
ENSBTAT00000001269	1.77211	1.9924	0.653589	0	0.607185	0.953502	1.24253	1.96437	1.8946	0.312352	0.173584	0.874478
ENSBTAT00000001270	4.03679	4.06635	3.92176	1.51058	1.43787	1.12379	4.41547	4.22693	3.71643	1.0316	1.25769	1.02916
ENSBTAT00000001271	0.484109	0.579736	0.471119	0.500834	0.486508	1.13071	0.927161	1.20669	0.379892	1.45051	0.860929	1.42588
ENSBTAT00000001276	0	0	0.00483082	0	0.00228748	0	5.22892e-05	0.125584	0.0044664	1.04698	0.00339004	1.1009
ENSBTAT00000001278	0	0	0.0332265	0	0.0557133	0.045998	0.0419615	0	0	0	0.027062	0
ENSBTAT00000001281	3.53795	3.44834	3.13491	1.3181	1.68835	1.23028	3.28763	3.23405	3.40563	2.03834	1.87102	2.03672
ENSBTAT00000001283	0	0.045805	0.0994553	0.40341	2.13859	0.137087	0	0	0.115972	0.294565	0	0.0763685
ENSBTAT00000001284	2.46629	2.85631	2.67606	3.16188	3.17503	3.32488	3.42235	3.0752	3.72713	3.76298	3.72777	3.42017
ENSBTAT00000001288	0.171642	0.0943824	0.335433	0.545147	0.117701	0	0.252227	0.466289	0.233437	0.501599	0.167168	2.56204
ENSBTAT00000001290	4.65246	4.79608	4.46307	4.59107	4.56413	4.36395	4.67384	4.51138	4.66594	4.05492	3.84359	3.87761
ENSBTAT00000001294	2.9565	3.2305	2.75172	3.2943	3.54353	3.47822	3.53928	3.69329	3.57294	3.33849	3.62008	3.46963
ENSBTAT00000001296	2.52331	2.83316	2.92268	0.636186	0.98714	2.33225	1.98592	2.86691	3.75335	2.45829	2.32855	3.01034
ENSBTAT00000001298	2.24531	1.8294	2.08041	4.78748	3.40021	2.82461	1.64771	2.14966	2.77542	1.61482	2.03891	1.45845
ENSBTAT00000001299	0.602157	7.28219e-05	0.39016	1.68392	0.214061	4.36504e-05	0.775485	1.15967e-06	0.461569	3.35586e-06	0.460667	5.40777e-06
ENSBTAT00000001303	7.00109	6.7531	6.45867	5.64048	5.52399	5.12424	6.92484	6.81138	6.79614	5.54822	5.83324	5.73268
ENSBTAT00000001304	0.256786	0.206148	0.346946	0.76703	0.822631	0.871945	0	0.0446494	0	0.0383506	0	0.33171
ENSBTAT00000001309	5.62529	5.62627	5.54547	5.0098	4.88293	4.49088	5.66994	5.11204	5.37678	4.95035	4.27287	4.88282
ENSBTAT00000001310	0.0891576	0.0623229	0.0581071	0	0.0061873	0	0.0726833	0.0817114	0.217027	0.00865748	0	0
ENSBTAT00000001311	0.924694	1.14211	0.872131	3.00816	2.61667	2.446	1.91654	1.46905	1.39792	1.77729	1.5668	1.9017
ENSBTAT00000001313	4.40812	4.40582	4.22926	3.75698	3.96686	3.44602	3.42935	3.83606	2.89212	3.07504	2.84133	3.14434
ENSBTAT00000001315	3.4175	3.73174	3.97291	5.11883	5.27228	5.29342	3.97647	3.40682	3.81492	4.83031	4.47866	4.79568
ENSBTAT00000001319	1.87605	2.35851	2.36502	2.84635	3.14738	3.5269	2.52557	5.05287	3.35898	5.19825	5.02459	5.18535
ENSBTAT00000001322	3.14082	2.9809	2.81878	3.94999	3.86244	3.60912	2.95781	3.26869	2.77374	3.44878	3.73645	3.76562
ENSBTAT00000001324	0	0	0.14901	0	0.105683	0.17006	0.19544	3.73509e-06	0.181735	0	0	0
ENSBTAT00000001325	0	0.0445174	0	0.237586	0.282544	0	0	0	0	0.150512	0.0404214	0.03757
ENSBTAT00000001327	0.246908	1.08355	0.158175	0.00121623	0.126181	0.540721	1.2839e-05	7.44362e-05	0.647233	0.75061	1.29839	0.0138096
ENSBTAT00000001328	1.84829	1.74578	1.99484	2.065	1.65693	1.49101	2.02228	1.91069	1.97371	1.4547	1.56658	1.84012
ENSBTAT00000001329	0.000326138	0.000259732	0.744654	0.714161	5.06106e-05	4.28897e-05	0.211714	0.75989	0.000318428	1.08611	0.392669	0.424362
ENSBTAT00000001330	9.48544	9.79066	9.62132	0	0.616049	0.0513682	9.37862	8.83101	8.61485	0.168561	0.514456	0.110496
ENSBTAT00000001332	3.02392	3.29116	2.84537	3.06631	2.84654	3.13259	2.62582	2.26006	2.83553	2.34035	2.16252	2.19079
ENSBTAT00000001335	3.09487	2.69646	3.55791	2.57555	2.37155	1.36251	1.36371	2.57001	0.582961	0.974315	0	0.41741
ENSBTAT00000001336	0.20307	0.265717	0.291258	0.195399	0.35726	0.427413	0.229197	2.00206	0.7984	1.66741	0.858339	1.30787
ENSBTAT00000001337	1.25074e-05	2.96159e-05	1.00285e-05	4.33532e-06	1.03298e-05	7.90492e-06	3.82657e-06	2.31099e-06	1.07353e-05	3.14814e-06	4.37129e-06	4.60916e-06
ENSBTAT00000001338	2.00766	2.04879	2.03919	2.15666	2.28403	2.55768	1.88065	3.36136	2.02341	3.25123	2.31397	3.38988
ENSBTAT00000001339	0.0303705	0	0.154845	0.31282	0.691789	1.22471	0.16259	0.0246919	0.149903	1.09971	0.674985	0.376479
ENSBTAT00000001343	3.1734	3.3583	3.12586	4.48072	4.51084	4.27202	3.607	3.46407	3.3434	4.14688	4.05977	3.92682
ENSBTAT00000001344	3.40808	3.27173	3.50143	3.30555	3.41521	3.36092	3.91525	3.97092	4.06934	4.28447	4.48314	4.1486
ENSBTAT00000001346	3.72875	3.54122	3.59408	4.50567	4.75405	4.96857	3.92063	4.24186	3.88823	4.43673	4.65597	4.38537
ENSBTAT00000001347	2.784	2.40208	2.22557	1.84177	1.66689	1.51042	1.99555	2.60154	2.55945	2.77984	2.96052	2.54404
ENSBTAT00000001348	3.74783	3.54958	3.51641	3.68824	3.72518	3.70518	4.34062	4.27493	4.61134	3.74967	4.15749	3.86701
ENSBTAT00000001351	0.506757	0.447571	1.33528	0	0.090827	0.163664	0.196722	0.0744439	0.18168	1.76895	2.36491	0.667121
ENSBTAT00000001353	0	0.350022	0	0	0.109659	1.92994	0.0829692	0.146875	0.183816	0.077572	0.0271398	0
ENSBTAT00000001355	2.12235	1.72307	1.68741	3.17631	2.931	2.56368	1.66267	1.98313	2.03135	3.79662	2.93892	3.44334
ENSBTAT00000001356	2.68465	2.74754	2.81509	2.24772	2.11556	1.81748	2.8308	3.24845	3.26376	3.0814	2.97413	2.97382
ENSBTAT00000001360	4.18188	4.17713	4.09738	3.39397	3.74345	3.62534	4.274	4.68913	4.35065	4.0846	4.26605	4.00108
ENSBTAT00000001366	0	0.109672	0.19604	0	0	1.14634e-06	1.69882e-06	1.36485e-06	2.24743e-06	0.0963628	0.162032	0
ENSBTAT00000001367	0.243503	0.529204	0.795161	0	0.308927	0.301048	0.514567	0.210511	0	0.48449	0.187551	0.403416
ENSBTAT00000001368	1.1241	0.877888	1.24477	0.895552	1.13275	1.01046	2.01479	2.10309	2.23179	1.99297	2.15346	1.72673
ENSBTAT00000001371	1.06613	0.223131	0.187475	1.09787	1.16506	1.19978	0.50155	1.69912	0.467272	1.28677	1.12807	0.400224
ENSBTAT00000001373	11.4542	11.2864	11.3651	1.09043	1.61535	0.577569	10.7709	9.90432	10.7546	1.09462	1.69752	1.21846
ENSBTAT00000001374	7.15928	6.96789	6.99831	6.42708	6.42226	6.28734	6.48603	5.9705	6.3945	5.75106	5.88167	5.96999
ENSBTAT00000001376	5.99294	5.9495	5.89172	5.25997	5.11777	5.38209	5.5183	5.5383	5.49501	5.07567	5.23519	4.99116
ENSBTAT00000001378	1.62101	2.43415	1.88797	1.60638	1.94928	1.3873	2.716	1.78041	2.76381	2.22786	2.12751	2.0321
ENSBTAT00000001379	5.47519	5.55797	5.54789	5.23923	5.14843	4.52336	5.85678	5.30813	5.79895	5.47884	5.05247	5.30147
ENSBTAT00000001383	0	0.314625	0.404335	0.391955	0.0852605	0.399481	2.55911	0	1.64951	1.07511	0.206364	0.267769
ENSBTAT00000001384	3.24013	3.17304	3.26456	2.6361	2.70196	2.69161	3.52995	3.52586	3.98632	2.95285	3.05081	2.88635
ENSBTAT00000001385	0.124366	0.194903	0	0.337311	0.18922	1.60586	0.143801	0	0	0.176509	0.492942	0
ENSBTAT00000001386	2.6366	2.39033	2.47845	3.04758	2.92345	2.6565	2.95124	2.54296	2.99281	2.87387	2.84166	2.77422
ENSBTAT00000001392	0.718029	0.760165	1.05347	0.0743244	0.128347	0.170538	0.719758	0.788681	0.822994	0.295707	0.100122	0.328687
ENSBTAT00000001393	2.86927	2.74222	2.60861	2.99895	2.94302	2.71142	2.81577	2.99529	2.97177	3.89192	4.26215	4.2199
ENSBTAT00000001395	0.675109	0.21889	4.09027e-06	6.7089e-05	0	1.02376e-07	0	0.454499	0	0.209451	7.00797e-05	4.62836e-06
ENSBTAT00000001397	2.82457	2.8627	2.38873	2.33004	2.93869	2.94898	3.60296	3.20621	3.59395	3.64178	3.65431	3.21856
ENSBTAT00000001400	0.3632	0.582711	0.885135	0.573071	0.846835	0.8807	0.457852	0.124315	0.156039	0.0158805	0.0484912	0.117163
ENSBTAT00000001404	7.11873	6.68973	6.8418	0.485135	0.194975	0.036222	5.26657	5.56126	5.47779	0.366157	0.648535	0.222103
ENSBTAT00000001405	7.14143	7.01683	7.15388	5.03125	5.59362	4.95343	6.66474	5.72117	6.45648	5.2367	5.31866	5.10246
ENSBTAT00000001406	2.75755	2.14382	2.98135	2.831	2.29629	2.77837	3.785	3.95303	3.31113	3.71529	2.93562	2.91039
ENSBTAT00000001407	3.69674	3.88053	4.36054	2.36831	2.56449	2.55355	3.2704	3.37723	3.34362	3.14925	3.44486	3.68846
ENSBTAT00000001409	1.00749	2.25077	1.95307	1.20437	0.406336	1.53991	1.46504	1.7555	1.70957	0.776907	0.87715	0.559849
ENSBTAT00000001412	0.395847	0.0664669	0.183199	0.644436	0.470218	0.625212	0.872672	2.05287	1.40334	3.25226	1.95656	3.4021
ENSBTAT00000001414	0.66383	0	0.176025	0.117536	0	0.12642	0	1.27215	0.764405	0.835851	0.284121	0.437177
ENSBTAT00000001415	0	0	0	0.0494553	0.0857128	0.104972	0	0	0.0448873	0	0	0.0861305
ENSBTAT00000001417	0.631959	0.710153	0.952163	2.13877	2.15706	2.28593	0.337464	0.158051	0.337621	0.941033	0.763248	1.10898
ENSBTAT00000001420	2.9029	3.09231	3.41944	3.05946	3.61618	3.03356	3.6739	4.2526	3.9351	3.95405	4.28854	4.0566
ENSBTAT00000001421	2.68244	2.94733	2.83592	2.06911	2.25047	2.22871	2.51787	2.4939	2.61568	2.58174	2.09803	2.07244
ENSBTAT00000001425	1.80674	1.62821	2.14526	1.02971	0.861632	1.86338	2.29539	1.65739	1.48841	2.58569	2.21641	2.77072
ENSBTAT00000001428	0	0.0649267	0.139915	0	0.0205718	0	0.0458508	0.0659712	0	0.164179	0.0295947	0
ENSBTAT00000001429	8.09062	7.89221	8.01734	0.430834	0.350357	0.855714	7.82168	7.60906	8.09735	1.42614	2.04613	1.01661
ENSBTAT00000001430	3.17163	2.59489	3.39768	2.42869	2.33719	2.33678	2.0565	1.8729	1.75889	1.9685	2.54392	1.72372
ENSBTAT00000001431	0.0947372	0	0	0.739031	0.467168	0	0	0.227602	0.100179	0.522538	0	0
ENSBTAT00000001432	5.86065	5.50727	5.42059	3.54488	2.72499	2.69076	5.57378	5.36008	5.30291	3.12013	3.89196	3.07407
ENSBTAT00000001438	0	0.0770733	0	0	0.0638108	0.673659	0	0.0899034	0.246873	0.0113752	0.0799735	0
ENSBTAT00000001439	0.862245	0.950788	1.17717	1.14459	0.7051	0.870443	0.910095	1.81514	1.33731	2.30689	0.861348	2.00164
ENSBTAT00000001440	1.56458	0.743182	1.28019	2.01565	1.34592	1.78765	4.08931	2.94494	5.87375	2.45988	2.45177	2.17828
ENSBTAT00000001445	0	0	0.1157	0	0.0994653	0	0	0	0.0692464	0.047174	0.0488	0.173515
ENSBTAT00000001446	3.77874	3.33894	3.35145	3.20195	3.27896	2.98816	4.43299	3.74617	4.69566	3.34861	3.27033	3.10668
ENSBTAT00000001447	4.86431	4.95734	5.01201	1.53345	1.68908	2.09003	4.68408	3.31671	5.09715	1.7357	1.80176	1.15222
ENSBTAT00000001449	6.59735e-05	0.55054	1.44829	5.72575e-08	0.69144	0.445514	8.55463e-07	2.08008e-05	0.551978	1.17793	1.24592	0.756328
ENSBTAT00000001451	2.04031	1.58493	1.95456	1.6606	1.31851	1.57714	1.40166	1.49649	1.3661	2.19963	1.66184	2.10226
ENSBTAT00000001452	1.72533	2.04164	1.92437	3.62007	3.44348	3.54001	2.11199	3.5674	2.92515	4.27839	4.85615	4.19455
ENSBTAT00000001453	3.0207	2.8991	3.18957	3.62095	3.66348	3.83781	3.79442	3.75394	3.87691	3.61612	3.95608	3.65422
ENSBTAT00000001455	0	0.0328286	0	0	0	0.025334	0.0458508	0.218797	0	0	0	0
ENSBTAT00000001456	0.59994	0.351642	0.139827	0	0.196394	0.440758	0.836879	1.89519	0.311743	0.112951	0.172068	0
ENSBTAT00000001461	0.794259	1.09039	0.492993	1.19726	1.05204	1.26254	1.20802	2.24738	1.62769	2.72198	2.82521	2.55847
ENSBTAT00000001463	3.11543	3.21737	3.95752	5.84952	5.24208	5.59204	4.56165	4.7709	4.33978	5.75691	6.08792	5.60767
ENSBTAT00000001464	5.25185	5.07727	4.89889	4.95083	4.99369	4.84345	5.72102	6.09464	5.97655	5.18676	5.31548	5.35063
ENSBTAT00000001465	5.80953	6.08817	5.67098	4.03785	3.82122	3.51243	7.11631	5.39647	6.37399	5.51746	4.98885	5.3474
ENSBTAT00000001466	1.77796	1.63283	1.70152	2.5635	2.21601	2.30239	1.94649	2.51812	1.53409	2.63549	2.83148	2.5567
ENSBTAT00000001467	3.74391	4.09976	4.40391	2.01304	2.08396	1.95573	2.81781	3.10629	3.52273	2.72865	3.23517	2.76304
ENSBTAT00000001470	4.19473	4.16522	4.17451	3.90528	4.43668	3.85005	3.47234	3.0612	3.69777	3.92148	4.254	4.15318
ENSBTAT00000001472	1.55238	1.85449	1.80332	2.28885	1.83053	1.98513	1.85444	1.72382	1.76735	1.57226	1.55058	1.52015
ENSBTAT00000001474	3.94834	3.99746	4.07672	5.11269	5.06099	5.06446	4.38148	4.59987	4.58683	5.03582	5.26449	5.22987
ENSBTAT00000001477	3.1055e-05	2.17111e-05	2.95985e-05	8.67939e-06	3.57805e-06	1.51554e-05	3.17268e-05	0.544032	0.838089	0.442389	0.672067	0.954066
ENSBTAT00000001479	3.86676	3.29083	2.39053	2.42711	2.8118	3.14271	3.37243	4.53653	3.00595	3.52502	3.94573	3.18117
ENSBTAT00000001482	2.48688	2.63623	2.69298	2.64042	2.61027	2.9182	3.42308	3.43641	3.15454	3.32693	3.86083	3.3591
ENSBTAT00000001489	2.55884	2.07925	1.75104	0.947145	1.17476	1.36334	1.87869	1.98315	2.59935	1.95126	2.15193	2.60733
ENSBTAT00000001490	7.79632	7.35241	7.05281	1.67801	1.87053	1.49011	7.49369	7.53929	7.62027	0.56095	0.391916	0.85379
ENSBTAT00000001494	2.96895	2.52454	2.97759	3.09579	3.285	3.05075	2.4284	2.43845	2.91554	2.56082	2.73667	2.80769
ENSBTAT00000001495	1.54709	2.08581	1.70737	1.73592	1.81247	1.96009	1.82523	1.33275	1.64644	2.41347	2.05208	1.731
ENSBTAT00000001496	0.727406	2.21328	0.709545	0.0961197	0.448475	0	0.268709	0	0.461469	0.0599244	0	0
ENSBTAT00000001499	0.119619	0.0968599	0	0	0.181788	0	0.138086	0.198018	0	0.391596	0.406105	0.240383
ENSBTAT00000001500	2.16135	1.67054	1.94982	0.867712	0.865943	0.655745	1.6317	2.95257	1.86708	2.60255	2.11931	2.1769
ENSBTAT00000001503	1.96	1.62317	1.37479	1.42902	1.69966	1.4191	1.91883	2.43746	1.93334	2.6043	2.49584	2.66175
ENSBTAT00000001505	2.5235	3.02894	2.71284	2.72684	3.14506	3.13822	3.17266	3.10854	2.73808	3.37123	3.29867	3.5595
ENSBTAT00000001507	3.87483	4.0087	4.10586	3.5785	3.42682	3.37309	3.97006	3.8855	4.00641	3.37833	3.5344	3.52601
ENSBTAT00000001508	3.52234	3.59726	3.17989	3.75064	4.03794	3.72276	4.02085	4.06001	3.9805	3.35756	3.26074	3.21506
ENSBTAT00000001510	2.39718	3.07734	2.8667	0.664163	0.958121	0.54419	3.49296	2.66647	3.24668	2.45018	1.87647	2.04278
ENSBTAT00000001511	0.0346773	0.159798	0	0.0778506	0.149737	0.56576	0.113679	0.0282621	0.0357488	0.422285	0.166971	0.315061
ENSBTAT00000001512	1.15587	0.855444	1.88411	0.434881	1.85958e-05	0.494004	1.30824	1.13543	0.878335	0.344945	0.0783765	0.473802
ENSBTAT00000001513	1.32646	1.24565	1.38612	2.28928	1.61053	1.93375	1.8148	1.66426	0.848982	1.21525	0.928	1.61052
ENSBTAT00000001517	1.4714	0.219091	0.000652678	1.2007e-05	0.284939	0.141128	0.000509466	0.00159258	1.22642e-05	2.36095e-06	0	4.18501e-05
ENSBTAT00000001518	4.99002	4.91632	4.95433	4.9994	4.37338	4.89955	4.78117	4.15062	4.52998	4.955	4.18508	4.37936
ENSBTAT00000001519	0.00174394	0.231824	2.78274	4.3626	4.24891	4.79467	2.69288	3.19173	2.71152	4.16988	4.15761	4.17925
ENSBTAT00000001520	2.73402	2.15213	2.19968	2.52908	2.73642	2.26348	3.01719	2.88843	2.62751	3.39749	3.27968	3.04705
ENSBTAT00000001522	6.43779	6.47179	6.0267	5.44951	5.73326	5.13855	7.44819	6.69336	6.87483	5.32966	5.53583	5.42449
ENSBTAT00000001526	5.99093	5.68194	5.38674	3.70598	3.50911	3.53772	5.22858	5.48225	5.28202	3.78993	4.21886	3.95599
ENSBTAT00000001531	3.57136	3.49192	3.59589	3.4281	3.11491	3.03812	3.34281	2.96439	3.59929	1.82779	2.67099	2.98842
ENSBTAT00000001533	0.0838556	0	0.145756	0.0490594	0	0	0.095625	0.20138	0.171431	0.173465	0.0623739	0
ENSBTAT00000001534	3.17811	2.97948	2.47956	1.22266	1.29601	1.23594	3.21715	2.68082	3.91442	1.37199	1.32905	1.64071
ENSBTAT00000001536	2.66847	3.28995	2.69436	11.2953	10.9058	10.5139	5.71776	4.85559	5.94262	11.1118	10.8054	10.7782
ENSBTAT00000001538	0.870244	1.13525	1.94235	1.35632	1.8294	2.22675	2.19963	2.39739	1.96383	2.95235	2.67862	2.39601
ENSBTAT00000001541	5.29661e-05	0.623965	0.45257	0.0424778	0.585042	0.331462	0.161263	0.516246	4.9115e-05	0.967703	0.340918	1.20704
ENSBTAT00000001544	2.14815	2.66365	2.81912	2.61217	2.80536	2.93264	2.41672	2.84025	2.33205	2.94768	2.79967	2.79079
ENSBTAT00000001545	1.08212	0.711063	1.0128	1.50055	1.89136	1.97245	1.88058	2.43049	1.9707	1.72556	2.01417	1.94164
ENSBTAT00000001547	0.173038	0.529317	0.461699	0.500229	0.807648	0.797464	0.701655	1.01067	0.880984	0.969917	0.877045	0.7575
ENSBTAT00000001549	0.933316	1.06732	0.538181	0.479069	0.945532	0.941278	0.77816	1.09488	1.41953	0.683421	1.11956	0.231663
ENSBTAT00000001550	2.62573	2.91975	2.86848	3.80032	4.12147	3.92154	3.01685	3.38338	3.10582	3.71294	3.3805	3.89742
ENSBTAT00000001552	3.50454	3.55129	3.65667	3.45582	3.73672	3.44647	3.28752	3.41978	3.51208	3.06938	3.55502	3.0964
ENSBTAT00000001557	4.55259	4.49823	4.54662	3.03049	3.07732	2.57728	4.83048	4.12323	4.31528	2.98566	3.10047	3.83466
ENSBTAT00000001558	3.17984	2.88412	2.93688	3.17532	3.0943	3.36256	3.25419	3.72857	3.33332	2.96695	2.82978	3.01255
ENSBTAT00000001560	3.8851	3.08273	2.46006	0.333598	1.02055	0.303896	4.13163	4.40162	3.9078	0.736168	0.411669	0.841647
ENSBTAT00000001562	3.421	3.40029	3.23708	3.63913	3.47936	3.63596	3.32949	2.93178	2.94628	2.85143	2.80289	2.6972
ENSBTAT00000001564	2.66317	2.74254	2.826	3.44671	3.31913	3.15628	2.52481	2.65702	2.77054	3.0522	2.56253	2.71938
ENSBTAT00000001565	4.49997	4.31262	4.12836	3.96617	3.57932	3.68769	4.35743	4.28395	4.2763	3.62672	3.765	3.69188
ENSBTAT00000001567	5.82957	5.82319	5.64764	0.894037	1.21219	1.1507	5.54781	3.71288	5.97586	0.488834	0.658927	0.726052
ENSBTAT00000001568	4.97092	4.24108	4.567	6.26207	2.77434	6.25999	5.2569	5.20149	5.13131	0.0311421	6.03922	5.83066
ENSBTAT00000001572	0.31397	0.392077	0.642785	0	0	0	0.221593	0.0569149	0.267362	0.0488003	0.0504956	0.0469544
ENSBTAT00000001573	0	0.234151	0.134171	0.3616	0.323122	0.227689	0.0876801	0.496235	0.230188	0	0.608621	0.419508
ENSBTAT00000001574	1.06861	1.39505	1.18079	0.789061	0.715044	0.564313	0.586193	1.18726	0.807036	1.94229	1.84142	1.82773
ENSBTAT00000001575	2.13899	2.23489	2.49454	1.62584	1.47397	2.41401	1.1647	0.246464	0	0.386424	0	0.204992
ENSBTAT00000001576	3.75613	3.76558	3.94093	3.43361	3.42197	2.84324	4.45196	4.21812	4.3553	4.55552	4.10104	4.7381
ENSBTAT00000001580	3.02858	2.96039	2.89273	5.11148	5.3207	5.58936	3.47258	3.67823	3.1203	4.81439	4.37589	4.67453
ENSBTAT00000001581	1.7729	1.5133	1.62439	1.491	1.68531	1.29432	2.03333	3.63164	2.28572	4.23194	3.38852	4.54143
ENSBTAT00000001585	0.54173	0.221903	0.198044	0.513807	0.370235	0.670015	0.883942	2.38656	1.32835	2.80471	0.953219	3.146
ENSBTAT00000001588	0.277865	0.596484	0.557767	0.0875417	0.0781155	1.83144	1.85594	3.30698	1.3212	1.76546	1.09362	2.18282
ENSBTAT00000001589	2.58531	2.64727	2.79131	3.29064	3.65062	3.13071	3.47995	2.96245	2.98079	3.25741	3.54044	3.12945
ENSBTAT00000001595	3.41815	3.73792	3.8848	2.87276	2.73618	3.03588	4.59604	3.95228	4.36101	3.91655	4.24773	3.55439
ENSBTAT00000001597	2.23027	1.52947	1.54014	2.48337	2.81742	2.12446	2.08453	2.83549	1.99486	3.14012	3.73914	3.85473
ENSBTAT00000001599	2.70744	3.438	3.77483	4.4008	4.75968	5.07571	4.0939	3.99016	4.27849	5.54243	5.70986	5.40236
ENSBTAT00000001613	3.01776	1.0081	2.05399	0.94526	1.11485	1.34213	3.90776	5.0272	5.15809	3.57829	1.44879	5.19932
ENSBTAT00000001617	2.4128	2.05783	2.25519	2.91908	2.75861	2.5119	2.54133	2.82173	3.14068	2.98766	3.33897	2.84153
ENSBTAT00000001619	4.58793	4.45472	4.54101	4.35959	4.0954	3.65748	4.22776	4.14836	4.06623	3.69631	3.73345	3.73651
ENSBTAT00000001624	0.614472	0.61608	0.613858	1.39614	1.29251	0.537713	0.419127	0.724058	0.389243	1.24768	1.39826	1.68307
ENSBTAT00000001625	4.07939	3.82356	3.91842	3.96005	3.81224	4.08047	3.67305	3.89914	3.53134	3.49133	3.62476	3.55112
ENSBTAT00000001628	0.344193	0.0308619	0.067414	0.0436747	0.0571893	0.282423	0.0430776	0	0	0	0.0550515	0
ENSBTAT00000001630	0.459721	0.511087	0.594031	1.25994	1.42488	1.16228	1.48956	1.27254	1.41121	2.06695	2.26171	1.93746
ENSBTAT00000001633	0.107978	0.0872991	0.312098	0	0	0.0343345	0.23385	0.0453457	0.216277	0.379552	0.359254	0.479056
ENSBTAT00000001635	0.53242	0.563327	0.515331	0.635868	0.759175	1.20998	0.976489	1.40518	0.917824	2.81644	1.0762	2.01344
ENSBTAT00000001639	0.166808	0.259229	0.284205	4.14515	2.65183	2.07548	0	0.268733	0.25579	0.871248	1.21003	0.418553
ENSBTAT00000001640	1.40777	1.36077	1.00059	2.20658	1.20469	1.69365	3.04029	2.67765	2.98453	2.48542	2.10616	1.90281
ENSBTAT00000001642	3.89058	2.3288	2.02979	3.14849	3.32324	4.49838	3.37109	3.69278	3.79311	4.80703	5.02206	4.39197
ENSBTAT00000001646	4.27719	4.62004	3.69224	5.89599	6.23318	6.17122	4.49598	4.87455	4.84544	6.47208	6.6061	6.54531
ENSBTAT00000001648	0	0	0.169902	0	0.293349	0	3.75008	0	2.42437	1.23641	0	0.595844
ENSBTAT00000001650	0.494476	0.409655	0.101175	3.24598	3.80774	2.76761	0.130606	0.0967073	0.522987	2.14175	2.26308	1.71308
ENSBTAT00000001651	0	0	0.0364669	0.355936	0.100582	0.236499	0	0	0	0.0571366	0.0589142	0.0813969
ENSBTAT00000001655	2.4606	2.14957	2.2541	2.21984	2.08308	1.829	2.25738	2.57855	2.16258	2.29496	2.74345	2.41393
ENSBTAT00000001658	3.93529	3.82822	3.51977	3.82267	3.84551	3.68835	4.88262	3.93588	4.59646	3.809	3.88634	3.8189
ENSBTAT00000001660	3.76317	3.5251	3.54489	4.5106	4.48746	4.44269	4.13747	3.7348	3.56692	4.8118	4.33768	4.76209
ENSBTAT00000001662	4.05544	3.66192	3.23713	2.15815	2.18666	2.37889	3.02328	2.5581	3.53655	2.41202	2.80208	2.15347
ENSBTAT00000001667	0	0.0577048	0.0636987	0	0.96632	0	3.13117	0	1.37771	0.812408	0.291328	0.187198
ENSBTAT00000001668	5.81396	5.84338	5.45722	5.99627	5.8532	6.06338	6.30086	6.52176	6.30228	5.96342	6.05326	6.04531
ENSBTAT00000001671	3.03002	2.41958	2.7048	4.97255	4.35547	4.68784	3.59258	3.40261	2.94783	4.86367	4.14026	4.36166
ENSBTAT00000001674	0	3.01285e-05	0	0	1.85372e-05	2.28067e-05	3.77233	0	2.42468	1.38534	0.629945	0.665831
ENSBTAT00000001675	0.78398	0.627763	0.271787	0.984516	0.671619	0.226591	0.415053	0.9488	0.727383	1.52685	1.0272	1.52125
ENSBTAT00000001687	3.55601	3.32306	3.26806	3.23123	3.15319	2.50292	3.39004	3.16795	3.08346	2.72248	2.5928	2.81207
ENSBTAT00000001692	3.61176	3.78458	3.34881	3.17302	3.11753	3.52286	3.60991	3.54678	3.74511	3.41364	3.09225	3.41204
ENSBTAT00000001696	0.0470397	0.0747778	0.122039	0.027084	0.201316	0.386852	0.052981	0.183466	0.0487447	0.274289	0.13237	0.123288
ENSBTAT00000001698	0.543031	0.771794	0.577916	5.7124	5.70553	5.51677	2.32624	2.92018	3.21573	4.5218	4.97684	4.76318
ENSBTAT00000001699	6.27	6.41061	6.33672	5.11504	4.97979	4.35249	5.38378	4.92637	5.12174	4.11409	4.32611	4.57952
ENSBTAT00000001700	0.867314	1.34695	1.30083	0.580103	1.11547	1.22539	1.95938	1.76016	1.20616	1.42546	1.31359	1.57994
ENSBTAT00000001702	6.32299	5.4736	4.5494	4.28258	4.24562	4.18518	5.5953	5.16865	5.21241	4.59222	4.8058	5.0648
ENSBTAT00000001703	1.13986	1.28248	1.6348	0.0977075	0.924807	1.1736	0.347997	0.745075	0.888262	1.18929	1.29107	1.09428
ENSBTAT00000001704	0.0464454	0.037393	0.0814652	0.153447	0.0693762	0.382441	0.0523013	1.33664	0.656768	0.186218	0.306938	0.287009
ENSBTAT00000001706	3.18646	3.29266	3.31355	4.32654	5.41469	4.70871	5.06319	5.27554	5.0458	5.99236	6.24577	6.2604
ENSBTAT00000001707	2.52189	2.28684	2.32333	1.61103	1.56156	1.61124	2.14047	2.06547	1.88179	1.92878	1.89698	1.74164
ENSBTAT00000001709	2.531	1.80911	1.88003	0.549408	0.71169	0.129496	3.95956	3.18385	3.54879	0.279503	1.47052	0.630722
ENSBTAT00000001710	1.61157	1.06134	1.4524	3.21041	2.86368	2.96936	2.20107	2.16653	2.01696	3.06784	3.05613	3.28936
ENSBTAT00000001716	1.9551	1.29384	1.70616	2.23326	1.74988	1.92776	2.35056	2.52866	2.51385	3.39675	2.79942	2.88717
ENSBTAT00000001718	5.27385	5.44276	4.98203	4.59234	4.90357	3.72522	4.6968	4.09672	4.29569	3.02831	3.99997	3.7811
ENSBTAT00000001720	9.48069	9.5572	8.59505	2.77884	1.29864	1.81755	9.67262	9.83435	9.64376	3.68338	5.52673	5.17887
ENSBTAT00000001723	3.8328	2.44695	2.08345	0.163626	0.0541597	0.161221	2.12289	1.29093	3.73103	0.231443	0.35134	0.571703
ENSBTAT00000001725	4.90394	4.87291	5.1554	4.76505	4.7709	4.53118	5.00598	4.6437	5.6193	3.89297	4.36477	4.05665
ENSBTAT00000001728	0.137814	0.215239	0.236316	0.341979	0.304362	0.0868022	1.11716	1.67257	1.14584	1.4017	0.03453	0.124272
ENSBTAT00000001731	7.19158	7.01909	6.83383	6.46327	6.33148	5.96845	7.04378	7.26767	6.89244	5.90562	6.24864	6.26524
ENSBTAT00000001734	2.46133	2.55421	2.32261	2.11459	2.77364	1.34653	3.02873	3.21433	3.04581	2.27345	1.90987	2.58428
ENSBTAT00000001744	2.74968	2.85051	2.75087	2.93309	3.08111	2.76793	2.85166	2.64807	2.86494	3.43344	3.34557	3.2222
ENSBTAT00000001745	2.30243	3.3831	3.36841	0.0774838	0.226494	0.162558	0.905397	0.482037	0.379756	0.859315	0.576926	0.176912
ENSBTAT00000001747	1.56208	1.8439	1.63733	2.79596	3.71449	2.70755	2.96157	3.03644	3.2139	3.45167	2.84046	2.75515
ENSBTAT00000001748	0.0915735	0.0734501	0.0815784	0.0514878	0.0447241	0.0555348	0.0999785	0.0718984	0.0919024	0.0629923	0.0641966	0.0597883
ENSBTAT00000001749	0	0	0	0.136718	0.33676	0.0997348	1.1251	0.193299	0.884074	0.407377	0.225482	1.79699
ENSBTAT00000001753	2.74265	2.84793	2.46677	3.31423	3.09613	2.82091	2.92506	2.52486	2.421	3.36264	3.2131	3.07283
ENSBTAT00000001754	4.01475	3.82338	3.91079	3.95126	3.58532	3.31693	3.35393	4.30974	3.30578	4.71884	4.31713	4.28755
ENSBTAT00000001756	0	0.0519445	0	0	0.299957	0.540317	0	0.0534106	0	0.175232	0.0933026	0.0440624
ENSBTAT00000001758	7.15709	7.41788	7.1857	8.50116	8.43407	8.66411	6.55816	5.31024	6.28444	7.17165	6.97337	7.2515
ENSBTAT00000001760	2.36029	1.47043	1.93848	6.90213	7.02771	7.24979	1.66592	1.7126	2.56387	5.16366	4.96053	5.17876
ENSBTAT00000001762	0.418298	0	0.20092	0.135098	0.120299	0	0.257189	1.47801	0	0.31309	0.463454	0.817945
ENSBTAT00000001767	4.08502	3.81317	3.57814	3.57762	3.36474	3.44281	4.25369	3.66601	3.97077	3.96945	3.75215	3.63718
ENSBTAT00000001770	5.62988	5.57977	6.6066	0.0914431	0.157524	0.0501056	4.67556	2.65174	3.43818	0	0.170256	0
ENSBTAT00000001772	1.79284e-05	1.18299e-05	1.39252e-05	9.06731e-06	7.79485e-06	9.16269e-06	0	0	1.81755e-05	1.11864e-05	0.315993	1.01944e-05
ENSBTAT00000001780	8.25933	7.95418	7.80554	5.51891	5.21196	5.43009	7.2055	7.39654	7.58706	5.81279	6.13964	5.9758
ENSBTAT00000001782	5.21944	4.80453	5.0255	4.35395	4.17501	3.81745	5.01566	4.94318	5.22648	4.71583	4.77809	5.01292
ENSBTAT00000001784	1.56523	1.74082	1.79905	1.03728	0.589498	0.741912	1.09381	1.18268	1.28325	1.08192	0.764706	0.884917
ENSBTAT00000001785	5.69596	5.3796	5.08355	3.35761	3.34799	3.49349	5.24407	5.11988	4.88694	3.02792	2.99595	2.96849
ENSBTAT00000001791	9.20422	9.09954	9.21958	9.93414	10.178	10.3115	8.91423	10.3309	9.84696	9.55931	10.3984	10.2658
ENSBTAT00000001799	3.11122	2.88086	3.90883	3.27309	2.34154	3.17868	4.56755	3.62728	4.19884	2.19488	1.69251	1.12776
ENSBTAT00000001801	0.708815	1.01411	0.955997	0.642008	0.472685	0.181524	0.995309	2.32682	2.03509	2.60553	3.08726	2.43929
ENSBTAT00000001802	3.62408	3.05952	3.49948	7.67198	7.25995	6.54033	4.44483	4.0749	4.73416	7.24378	7.30009	7.18312
ENSBTAT00000001810	0.195972	0.302989	0	0	0.10398	0	0	0	0.107434	0.0732903	0	0.138434
ENSBTAT00000001812	0	0.105441	0	0.0763043	0.540153	0.403685	0.0754751	0	0.0695575	0.37909	0.390743	1.30832
ENSBTAT00000001821	0.926995	1.3019	1.67338	0.856507	0.744237	0.839828	2.00352	1.60578	1.57559	1.65733	1.52561	1.25069
ENSBTAT00000001824	2.86232	2.30845	2.36784	1.5439	1.73613	1.02526	3.93	3.55485	3.24372	2.92969	3.10522	2.53703
ENSBTAT00000001825	0.740205	0.855127	1.22785	0.934826	0.934618	2.3267	0.267716	1.04462	1.62471	1.40118	0.849891	0.997323
ENSBTAT00000001830	5.05615	4.97253	4.83873	5.30061	5.09454	4.73881	4.90136	4.9603	4.7412	5.82045	5.74127	5.49565
ENSBTAT00000001831	2.91286	3.00874	2.66449	2.77674	2.73597	2.72733	3.15169	2.6825	2.68827	2.32098	1.91145	1.94045
ENSBTAT00000001832	2.36548	2.77998	2.9442	5.70128	5.31507	6.23477	2.97176	3.83355	2.82055	3.98163	4.45011	3.78821
ENSBTAT00000001838	9.83651	10.0291	9.72612	6.00406	5.47255	5.3881	11.4355	9.76335	10.9139	4.71707	5.23615	4.89735
ENSBTAT00000001839	5.47027	5.09002	5.29977	5.79563	5.62049	5.00793	5.06674	5.44605	5.6739	5.8681	5.90633	6.42876
ENSBTAT00000001840	0	0	0.118224	0.329482	0.111614	0.212415	0	0.0737352	0	0.0634948	0	0.119352
ENSBTAT00000001844	2.9756	3.38362	2.64363	5.01822	5.44464	5.11076	3.55583	3.99975	4.07103	4.9804	5.29141	5.02385
ENSBTAT00000001846	5.28012	4.96647	5.2398	4.70787	4.51341	4.04679	4.58951	3.85501	4.26846	4.48334	4.02874	4.2018
ENSBTAT00000001847	3.39539	3.55748	3.93391	4.22643	4.18789	4.2812	3.70901	4.44581	4.36704	4.51043	5.20021	4.50006
ENSBTAT00000001849	2.14275	1.61715	1.71688	0.732051	0.633151	0.478646	1.93968	2.52292	1.7248	1.9784	1.57907	1.56652
ENSBTAT00000001851	1.98939	2.13325	2.44167	1.93183	2.09439	1.62127	2.7175	2.46194	1.85989	1.04037	0.908424	1.25395
ENSBTAT00000001854	3.18876	3.02307	3.13782	3.34063	3.00409	2.76187	2.17801	3.48304	2.7211	4.49891	3.50503	3.89461
ENSBTAT00000001855	1.69697	2.09771	1.96979	1.81558	1.47317	1.75076	2.29105	2.65301	1.52651	2.51647	1.99928	2.04283
ENSBTAT00000001859	0.0546047	0.128142	0.18523	5.66491	6.25717	5.91892	3.14011	2.96596	4.16148	8.01374	7.60635	7.749
ENSBTAT00000001861	4.00475	3.84257	4.03458	2.71321	2.54655	2.37374	4.58455	4.33058	4.47346	3.98808	3.81352	4.16199
ENSBTAT00000001863	2.78485	2.23444	2.38307	3.50491	3.51866	3.11613	3.01573	3.27301	3.08417	4.87151	4.32472	4.58059
ENSBTAT00000001867	3.57984	3.55469	3.30964	3.29326	3.28396	3.29267	4.2167	4.32855	4.11252	3.50962	3.68826	3.38678
ENSBTAT00000001868	4.22602	3.99021	4.17387	4.59995	4.57844	4.6782	4.77825	5.07075	5.22996	4.65274	5.12068	4.77206
ENSBTAT00000001872	0.716476	1.16857	1.58456	0.487171	0.677132	0.901479	1.59378	1.25093	1.99379	3.26757	2.55712	1.91881
ENSBTAT00000001883	3.21889	2.67253	2.90373	3.56964	2.63374	2.79786	3.14765	2.25798	2.37897	3.06385	2.81836	3.0695
ENSBTAT00000001886	0.70739	0.139786	0.644052	1.63475	1.85515	2.02544	1.48788	0.829604	1.07984	1.3174	1.51678	1.2432
ENSBTAT00000001888	1.44442	1.57458	1.43415	3.10094	2.35595	2.51833	2.42917	2.74928	2.1308	3.84139	4.3975	4.40426
ENSBTAT00000001890	3.32447	3.51545	3.19237	5.25431	5.03822	4.85439	3.61665	3.96493	3.333	5.16667	5.20573	5.22822
ENSBTAT00000001891	0	0.0416348	0.133782	0.438371	0.809256	0.293867	0.168308	0.163111	0.295624	5.00178	2.94085	2.49844
ENSBTAT00000001893	3.65562	4.08465	3.51364	4.60125	4.87219	4.18583	4.80635	5.97664	4.48851	5.1788	5.582	4.77193
ENSBTAT00000001895	1.43982	0.800297	0.768081	1.84344	2.10252	2.93707	1.81246	2.23678	0.661476	3.91801	2.0963	3.54458
ENSBTAT00000001896	2.46231	1.95566	2.15103	2.58733	2.05348	2.04908	1.29589	3.46227	2.61226	3.36913	4.1606	3.97936
ENSBTAT00000001897	4.82461	4.8854	4.91001	4.80054	5.5603	5.43028	4.26822	4.30612	4.48823	5.32707	4.97512	5.18277
ENSBTAT00000001908	3.91856	3.36547	3.24555	2.25701	2.27722	2.21925	3.71132	2.39039	1.42225	2.48412	2.90743	2.40823
ENSBTAT00000001909	0.973423	0.507554	0.907638	1.4959	0.68343	1.59249	0.000424308	0.617554	1.2384	0.39884	0.543987	0.883049
ENSBTAT00000001914	3.89226	3.4094	3.54639	4.47783	4.25224	4.37648	4.4611	3.78127	3.5621	4.13913	4.58618	3.97868
ENSBTAT00000001917	4.03181	3.98085	4.05946	3.39852	3.48697	3.65653	4.00526	4.21265	4.18867	3.19516	3.49927	3.24086
ENSBTAT00000001918	0.301123	0.27845	0.372252	1.66916	1.15822	1.13072	0.29224	0.112904	0.185893	0.949409	0.494243	0.920337
ENSBTAT00000001919	5.27398	5.33946	5.73389	3.03671	1.67484	1.93253	4.51424	3.98563	4.52496	1.90244	1.76066	1.99312
ENSBTAT00000001923	2.86216	2.72303	3.03999	1.23075	1.72704	1.38883	3.58235	3.47786	4.01544	2.43607	2.69017	2.70988
ENSBTAT00000001925	6.48115	5.63474	5.19909	3.32528	2.66374	2.6718	5.6041	6.1645	6.137	3.62646	4.35709	3.8755
ENSBTAT00000001927	1.05109	0.684969	1.00596	1.47942	0.799788	0.960323	1.29088	1.61207	1.22173	2.24214	1.97808	2.21454
ENSBTAT00000001929	2.43279	1.79689	1.9159	0.36325	0.234778	0.661481	1.98812	1.79744	1.69829	1.41418	1.74398	1.40373
ENSBTAT00000001930	1.01655	1.28641	1.17047	0.935202	1.15172	1.85371	0.383103	0.836783	0.190033	1.52901	1.47693	0.244121
ENSBTAT00000001933	1.64788	1.78993	1.99645	0	0.238932	0.696645	2.21154	1.80065	0.464673	2.45147	1.23672	1.33469
ENSBTAT00000001935	3.67176	3.50167	3.65102	2.25329	2.04582	1.5947	4.01285	3.32187	3.43807	2.3179	2.63326	2.78316
ENSBTAT00000001939	2.68167	2.63912	2.54686	3.5047	3.40607	4.18394	2.96388	3.34293	2.97984	3.94955	3.55224	4.57895
ENSBTAT00000001940	0.0299441	0.0939847	0.152758	0	0.0591119	0.0548679	0.0983526	0.117787	0	0.178485	0	0.0200494
ENSBTAT00000001942	1.71192	2.07808	2.38927	3.57615	3.22614	3.82128	2.66763	3.70056	2.73451	3.08982	3.65442	3.47076
ENSBTAT00000001944	2.25947	2.26873	2.14676	4.17005	3.68464	3.64725	3.07752	2.8935	2.80925	3.49075	3.74398	3.2311
ENSBTAT00000001948	4.91853	4.21156	4.164	6.73048	6.97029	6.18054	4.86649	5.89692	5.03861	5.32767	5.73567	5.96114
ENSBTAT00000001949	4.06773	4.32675	4.19357	4.30211	4.43783	4.43171	4.14971	3.959	4.03626	3.53448	3.84703	3.6092
ENSBTAT00000001950	0.436243	0.360074	0.503984	1.3961	1.40548	1.21527	0.344127	0.198098	0.31959	0.844173	0.797454	0.358728
ENSBTAT00000001952	0.0226338	0	0	0	0.0772738	0	0	0.0364137	0.0460651	0.12172	0	0.102447
ENSBTAT00000001953	0.950594	0.684224	0.922226	0.768923	0.978206	0.778548	0.84255	1.78275	0.810881	1.61453	1.22946	2.24642
ENSBTAT00000001962	1.82836	1.32418	1.8557	1.37845	1.24254	0.955474	0.537602	0.478578	0.734732	1.4547	0.737817	0.876238
ENSBTAT00000001963	3.68576	3.58185	3.52867	3.94613	3.97349	3.67609	3.52885	3.79895	3.64806	3.81403	4.29269	4.07157
ENSBTAT00000001967	3.63206	3.60629	3.53597	3.36775	3.24421	3.59493	3.44608	3.40438	3.5128	3.09303	3.29356	3.16135
ENSBTAT00000001970	0.220757	0.221443	0.0520026	0.161652	0.115563	0.98139	0.953971	1.60484	1.1968	1.29687	1.29057	1.1757
ENSBTAT00000001972	2.60748	2.64529	2.66319	3.37115	3.072	2.61901	2.72533	2.50875	2.52877	3.27973	3.10901	3.22188
ENSBTAT00000001973	2.4477	2.80627	2.6064	2.30797	1.85378	1.61678	2.49081	2.48798	2.34348	1.72219	1.51184	2.12837
ENSBTAT00000001974	4.14749	4.08361	4.22101	4.32938	4.47522	4.05297	4.23767	4.50397	4.5315	4.90675	5.09667	4.84155
ENSBTAT00000001976	2.09735	2.12267	2.03681	1.68133	1.56415	1.56735	2.01973	2.23076	2.62419	1.97774	2.16376	2.16184
ENSBTAT00000001977	3.18804	2.99323	3.2896	4.19939	4.14976	4.5626	3.44804	3.16612	3.28198	3.42266	3.64341	3.56107
ENSBTAT00000001978	6.68551	5.49889	6.00949	4.24483	4.15841	4.75644	4.78548	5.10563	5.74897	3.34127	4.86954	4.6112
ENSBTAT00000001981	3.13716	2.98223	3.17261	1.67475	1.58967	1.40429	3.16558	3.21024	3.48129	2.91574	2.96642	2.907
ENSBTAT00000001982	2.6547	2.80836	2.7325	1.95771	1.97348	2.56202	2.36302	2.45411	2.45263	2.03853	1.70411	2.5872
ENSBTAT00000001988	0.302141	0.952544	2.22429	0.224296	0.341402	0.326931	1.22199	1.04812	1.40929	0.768941	0.826287	0.262419
ENSBTAT00000001989	3.71637	3.92314	3.74961	3.42245	3.25522	3.39968	3.83763	3.73731	3.64706	3.04238	3.25553	3.08534
ENSBTAT00000001990	2.73376	2.89845	2.99773	2.13583	2.10947	2.16397	2.10633	1.46276	2.34568	2.01343	1.9824	1.79725
ENSBTAT00000001991	5.14063	5.10255	5.18776	4.29445	4.5276	4.34792	5.88591	5.8437	5.64543	4.56864	4.6079	4.54434
ENSBTAT00000001993	9.40062	9.58502	9.50055	7.12745	7.9212	7.90148	8.41262	8.41384	8.72844	6.50182	7.33848	7.15427
ENSBTAT00000001994	3.49128	3.60039	3.37051	3.35442	3.02812	3.2219	4.41504	3.83782	3.94425	3.34732	3.17331	3.68153
ENSBTAT00000001995	2.94046	2.61661	2.66635	4.4145	4.48467	4.59222	2.77694	2.677	2.82492	3.85637	3.77534	3.43747
ENSBTAT00000002003	3.89323	3.91623	3.89157	3.78419	3.7495	3.82562	3.86245	3.8146	3.81327	3.71065	3.77557	3.73005
ENSBTAT00000002005	3.74739	4.24849	3.95377	4.1901	4.18071	4.10439	3.7549	4.03256	3.84464	3.66244	3.99815	3.9163
ENSBTAT00000002006	3.23338	3.0684	3.05999	3.48863	3.6182	3.68676	3.31346	3.87643	3.5007	3.45735	4.03551	3.84716
ENSBTAT00000002010	1.98577	2.40248	2.41343	3.27707	3.10941	3.32604	2.66004	2.18933	2.21588	2.98197	2.90129	2.72356
ENSBTAT00000002011	2.48274	2.31852	2.45839	3.14272	2.58906	2.1958	3.07462	3.78471	3.4681	3.48718	4.41013	3.84428
ENSBTAT00000002015	5.71001	5.20229	5.39406	3.87796	3.89362	3.61079	3.58436	3.63646	4.1512	3.4447	3.68574	3.14337
ENSBTAT00000002017	3.81614	3.5915	3.70189	4.93758	4.56565	4.35648	4.08107	3.83014	4.41391	4.37694	4.93111	4.64457
ENSBTAT00000002019	1.33145	1.76592	2.64188	2.59341	1.75412	2.35723	3.77181	3.32031	3.98418	4.39034	4.09793	2.99948
ENSBTAT00000002020	1.49356	1.29816	1.43776	2.56291	2.72204	1.15016	1.39603	0.547419	0.947104	2.59994	1.91509	1.86905
ENSBTAT00000002024	3.71754	3.73715	3.77783	3.93095	3.35364	3.36144	3.92546	4.07986	3.01749	3.06421	3.0128	3.55154
ENSBTAT00000002028	4.32442	4.04076	4.03891	2.93206	3.18379	2.76246	3.82394	3.96708	4.40293	3.39309	3.96548	3.85675
ENSBTAT00000002033	5.68761	5.60817	5.60852	6.32096	6.228	6.43226	6.34105	7.2187	6.40304	6.78	6.85604	6.31636
ENSBTAT00000002038	4.41528	4.67656	4.46686	3.92893	3.82243	3.71549	4.09102	4.39948	4.46331	3.59766	4.05399	3.54546
ENSBTAT00000002039	0.213041	8.28881e-07	0.108938	6.96063e-09	2.22296e-07	7.42881e-08	0	8.42871e-08	0.000238576	0	0	0.102408
ENSBTAT00000002043	0.599906	0.53568	0.629611	0.0471102	0.0620005	0.170569	0	0.515256	0.20327	0.651377	0.059879	0.186203
ENSBTAT00000002045	4.38385	4.27728	4.3559	5.10809	5.03054	5.19299	4.70678	5.05113	4.64194	4.91408	5.07557	4.82677
ENSBTAT00000002051	2.91104	2.52628	2.39824	4.3416	4.42562	4.31552	4.20803	5.16106	3.35063	4.61539	5.69188	4.97475
ENSBTAT00000002052	1.32644	1.3432	1.3039	1.63289	1.51637	1.46182	1.83999	2.11268	1.76601	2.75749	2.23777	2.5752
ENSBTAT00000002055	5.81611	5.61203	5.61318	6.83866	6.69823	6.25924	7.87325	7.628	7.66704	7.88313	7.90435	7.71829
ENSBTAT00000002060	5.22447	5.08372	5.22522	3.1816	4.02284	3.77441	5.4816	5.40877	5.84079	4.93233	4.54909	5.18185
ENSBTAT00000002064	1.9162	2.38891	2.39977	2.73792	2.50281	2.64121	2.35836	2.25096	1.99514	2.28624	2.24331	2.24101
ENSBTAT00000002065	2.40809	1.95027	2.40288	2.76186	2.63194	2.66549	2.91746	2.83966	2.77186	3.28995	3.30191	3.58963
ENSBTAT00000002066	4.90666	4.63846	4.32675	5.0164	4.9926	4.90671	4.66245	3.79061	3.73094	3.67357	3.66157	3.86005
ENSBTAT00000002067	5.57498	4.77356	4.91807	5.40859	4.80388	4.83947	4.42199	4.39615	4.40197	4.58808	4.61413	4.49306
ENSBTAT00000002068	5.23365	4.98424	4.93265	3.36769	3.36051	3.37375	4.43497	4.61163	4.56659	3.59467	3.71962	3.63422
ENSBTAT00000002071	0.680337	1.01497	0.501865	2.5886	3.4056	3.92857	0.682188	0.524443	0.353563	0.276818	0.285002	0.266373
ENSBTAT00000002076	2.7825	2.63635	2.93156	3.32941	3.54777	3.82168	4.11632	4.54171	3.94078	4.72705	4.58405	4.77431
ENSBTAT00000002080	4.64815	4.72833	4.73418	6.03317	5.88716	5.8934	5.50063	5.35395	5.10718	5.79514	5.75202	5.72692
ENSBTAT00000002084	2.38883	1.45151	1.57064	5.9544	5.59625	5.59586	3.36674	2.17867	2.72335	4.36922	4.81372	4.78213
ENSBTAT00000002086	1.56353	1.85948	1.93626	1.30077	1.56298	1.10994	2.07174	1.94637	2.04834	1.79659	2.1987	2.05286
ENSBTAT00000002087	2.66786	2.84368	2.7998	2.05608	1.83222	1.9049	2.16479	2.72278	2.81176	2.53981	2.69152	2.52602
ENSBTAT00000002088	1.35369	1.36204	1.77874	1.01961	2.59764	3.80802	3.01596	0.515259	1.6199	1.22434	1.31721	2.37806
ENSBTAT00000002092	0.459746	0	0	0	0	1.62454	2.04511	3.8968	3.37832	1.18794	0	2.58466
ENSBTAT00000002094	1.75449	1.89173	1.76508	2.19242	2.37597	1.67448	2.48036	2.36183	2.31555	2.8499	3.08673	2.83636
ENSBTAT00000002096	4.85425	5.20228	5.18195	0	0.00251365	0.00327963	5.43468	4.85508	5.28695	0.00367215	0.00347022	0.00328357
ENSBTAT00000002098	3.15331	3.62075	3.34291	2.91074	2.69066	2.91835	3.87126	4.1095	4.08281	4.19717	4.20454	4.29094
ENSBTAT00000002101	0.165376	0.649387	0.302852	0.142263	0.0430148	0.185431	0.372916	0.864471	0.247828	0.42099	0.267396	0.282154
ENSBTAT00000002103	7.28742	6.82179	6.69951	0.253193	0.0522313	3.17365e-09	6.94393	6.73207	7.06152	0.050008	0.195678	0.153611
ENSBTAT00000002106	1.69108	1.44307	1.45578	2.91056	2.4677	2.98431	2.2114	2.01467	2.08922	2.68054	3.12544	2.95328
ENSBTAT00000002111	2.61544	2.56429	2.72916	4.05962	3.96834	3.75829	2.98811	2.33103	2.40214	3.61804	3.47071	3.62973
ENSBTAT00000002113	3.87655	3.76845	3.69884	2.55773	2.23503	2.29729	4.4919	4.93029	4.79565	3.66086	3.55006	4.10998
ENSBTAT00000002115	5.4951	5.33404	5.82312	0.535294	1.16636	0.429358	6.51527	6.32122	6.53057	2.14914	2.66034	2.61668
ENSBTAT00000002117	2.34784	2.09875	2.37746	1.56466	1.79144	1.54623	2.15822	1.85293	2.17452	2.13248	2.4394	2.35277
ENSBTAT00000002119	0.323205	0.522774	0.199929	0.282289	0.0596751	0.362461	0	0.0488832	0.12069	0.0419576	0.0433673	0.11771
ENSBTAT00000002120	4.20452	4.50265	4.27314	3.407	2.98373	2.89979	3.96029	3.68282	3.97957	3.23612	3.48749	3.15062
ENSBTAT00000002121	2.43232	2.13504	2.08713	3.30819	3.06805	3.32039	2.62625	2.17536	1.72996	3.34195	3.05621	3.06752
ENSBTAT00000002122	8.52389	8.14691	8.05311	1.75141	1.30371	1.44524	7.38608	7.32631	7.28289	1.38829	2.29314	1.78569
ENSBTAT00000002123	2.41145	2.47372	3.18414	4.63986	3.14493	3.72774	3.75727	3.33168	3.67741	4.65118	4.40981	4.44166
ENSBTAT00000002124	2.5215	2.90211	0.0133596	2.15786	2.28709	1.95867	0.00478667	0.937125	1.60521	2.39507	1.90592	1.67446
ENSBTAT00000002126	1.4991	1.188	1.16848	0.281468	0.278928	0.335674	0	0	0.0689818	0	0	0.0451987
ENSBTAT00000002128	0.709984	0.674015	0.809698	1.33736	1.07248	1.50978	0.0846654	0	0	0.420227	0.474352	0.148575
ENSBTAT00000002130	3.16747	3.22376	3.51661	3.67775	3.98462	3.73651	0.343897	0.580661	0.320676	0.322483	0.765542	0.217557
ENSBTAT00000002131	1.15975	1.25219	1.24848	1.86944	1.43848	1.66128	1.89323	1.83813	1.68972	1.96161	2.29262	2.30666
ENSBTAT00000002134	3.57	3.60611	3.573	2.55295	2.4563	2.05074	3.72122	3.08069	3.47655	2.13672	2.30261	2.30199
ENSBTAT00000002136	1.02428	0.297393	0.789135	0.362541	0.383736	0.412628	0.946173	0.690465	0.530362	1.56302	0.742488	1.52344
ENSBTAT00000002140	3.98087	3.43857	3.22448	3.0823	2.70394	3.12283	3.25278	3.60064	3.77686	3.23522	3.42262	3.11244
ENSBTAT00000002142	5.11951	4.95726	4.90802	2.89081	2.88315	1.9959	5.22905	4.40971	4.87648	4.56041	3.26989	4.02469
ENSBTAT00000002144	3.09977	3.46307	3.5146	3.14651	3.51051	3.33114	3.93427	3.64601	3.93036	3.40128	3.45007	3.40753
ENSBTAT00000002145	0	0.509233	0	0	2.53531	0	6.16114	0.245574	5.72939	3.34286	2.04347	3.01708
ENSBTAT00000002151	1.61594	1.67544	1.47594	1.75461	1.65814	1.92035	2.28252	2.29747	2.46271	2.35505	2.70232	2.4719
ENSBTAT00000002156	2.4523e-05	2.00897e-05	2.27013e-05	1.38357e-05	1.19152e-05	1.23684e-05	0.338291	1.82611e-05	2.43411e-05	1.51124e-05	1.7813e-05	0.695343
ENSBTAT00000002157	3.21275	3.22055	3.0545	3.32315	3.12828	3.19366	2.84169	2.69881	2.5319	2.30777	2.17572	2.4152
ENSBTAT00000002158	1.93615	2.20131	2.04391	1.40049	1.70555	1.65919	2.28918	1.94023	2.4486	2.24682	2.06209	1.99943
ENSBTAT00000002160	6.42264	6.29584	6.29456	6.92076	7.05451	7.18418	7.92854	8.44359	8.25236	7.78818	8.47719	8.03021
ENSBTAT00000002161	1.52605	1.44712	1.83732	3.21607	3.10552	2.6309	1.35087	2.39222	2.14738	3.22758	3.8099	3.22301
ENSBTAT00000002162	0.171185	0.186282	0.229948	0.248864	0.140423	0.242309	0.12359	0.233083	0.159876	0.141939	0.842808	0.250717
ENSBTAT00000002165	4.18012	4.15325	3.89376	3.64506	3.96821	3.52632	3.75974	4.3378	4.00097	3.59078	4.23511	3.87741
ENSBTAT00000002166	0.367737	0.551966	0.527992	1.51398	1.26407	1.31746	2.87732	3.23785	2.92035	4.24657	5.01584	4.66341
ENSBTAT00000002168	4.29633	3.3239	3.05016	4.64483	3.62363	3.57639	3.8747	3.50378	4.15501	4.41593	4.28211	4.15445
ENSBTAT00000002169	3.20594	2.57053	2.76497	1.95852	1.92154	1.39098	2.61898	2.04927	1.82937	0.000470928	1.63753	1.47503
ENSBTAT00000002170	6.10767	5.71326	5.33803	8.33461	8.29324	8.4529	5.90424	6.54891	6.07048	7.66243	8.18584	8.44099
ENSBTAT00000002174	6.05799	5.74216	5.83071	6.22665	5.24098	5.27432	5.40492	5.00208	5.78803	4.96319	5.04533	5.16714
ENSBTAT00000002176	2.6278	2.36785	2.52532	1.32969	1.43238	1.69138	2.61268	2.35453	2.73245	2.2057	1.87284	1.91708
ENSBTAT00000002177	2.89982	3.38773	3.21214	3.27762	3.19459	3.42282	2.91142	3.15996	3.17688	3.23611	3.50416	3.54724
ENSBTAT00000002179	4.02196	4.15716	4.01266	2.79616	2.84719	2.6742	4.56014	4.02185	4.66778	3.53619	3.77168	3.52607
ENSBTAT00000002182	2.47326	2.61288	2.49245	3.19477	3.12032	2.8608	2.82974	2.78895	2.08213	2.88317	3.58755	3.3113
ENSBTAT00000002191	4.87859	4.90748	4.81425	3.7851	4.00168	3.88942	4.1749	4.47815	4.63315	3.69133	4.01372	3.89667
ENSBTAT00000002193	3.22094	3.25042	3.28813	3.53048	3.67924	3.68989	3.36392	2.88796	3.01926	3.30958	3.60023	3.268
ENSBTAT00000002194	0	0.15263	0.058175	0.0748796	0.330946	0.299056	0.144497	0.156848	0.255508	1.56798	0.717169	1.19564
ENSBTAT00000002199	0	0	0	0.482159	0	1.11119	0.537633	0	0.143062	0.0977156	0	0
ENSBTAT00000002200	2.71737	1.36718	1.01387	5.81331	4.31248	4.03391	2.26688	1.90208	2.14883	3.45547	3.11745	3.38492
ENSBTAT00000002209	0.92335	1.14329	1.42623	1.88324	2.62219	1.81108	0.980236	2.21599	1.13214	1.05935	1.18651	0.637945
ENSBTAT00000002220	3.90159	3.76331	3.62202	2.01696	2.23131	1.68897	3.06713	2.52519	2.83928	2.12558	2.04575	2.10162
ENSBTAT00000002222	0.969536	1.06105	1.16273	1.9952	1.54653	1.41594	0.934238	0.948104	0.514733	1.41753	1.30299	1.46005
ENSBTAT00000002223	0	0.0393187	0	0	0.119652	0.615987	0	0	0	0.0344715	0.262782	0
ENSBTAT00000002225	5.67665	5.75148	5.9626	6.12241	6.04249	6.05012	5.73182	5.45614	4.97047	5.44134	5.51358	5.57489
ENSBTAT00000002226	3.98663	4.05631	3.95336	3.81334	3.93193	3.57528	3.84172	3.68467	3.56898	4.17717	3.9039	4.14215
ENSBTAT00000002228	3.83058	3.953	3.80749	0.425237	1.01382	2.81851e-05	2.0732	1.49115	2.40067	2.37002	1.8455	1.86703
ENSBTAT00000002229	7.3133	5.20434	4.67317	4.36142	2.11772	2.30743	3.6492	4.26675	4.45765	3.75589	3.9076	3.51884
ENSBTAT00000002231	1.956	1.10925	1.25513	1.71143	0.816097	1.57901	2.61211	1.72424	2.45116	2.20551	2.05069	1.48839
ENSBTAT00000002234	0	0.125579	0	0	0.0409906	0.145272	0.0904997	0	0.083498	0.111665	0.222654	0
ENSBTAT00000002235	5.12449	4.50038	4.63174	0.238711	0	0.0551114	4.11558	3.61144	4.02951	0.0315196	0	0.301986
ENSBTAT00000002237	2.093	2.00515	2.40663	1.9516	2.67157	3.24503	3.15078	2.79021	2.56212	2.72227	3.55158	2.95735
ENSBTAT00000002240	4.04858	3.57051	3.81227	4.23794	3.98233	3.75564	3.84577	4.31863	4.27686	3.9956	4.17863	4.34831
ENSBTAT00000002241	3.0043	3.28249	3.15819	1.76362	2.04111	2.05397	2.90432	3.04572	3.76974	2.29427	2.7219	2.46504
ENSBTAT00000002243	2.53693	2.51834	2.55758	3.23098	3.34178	2.54007	2.3049	2.91623	3.31016	3.72683	3.65981	3.78734
ENSBTAT00000002247	0.721013	1.06243	1.36203	1.21915	0.903759	0.855283	1.23213	1.1876	1.38654	1.32725	0.935987	1.06396
ENSBTAT00000002250	0.348248	0.170207	0.465631	0.921536	0.943626	0.637853	0.97928	0.214446	0	1.27976	0.648621	0.775334
ENSBTAT00000002256	5.0983	4.83883	5.06748	4.27048	3.52863	3.32915	4.42964	4.62831	4.98751	4.44558	3.94606	4.49177
ENSBTAT00000002257	1.24143	0.350751	0.685914	0	0	0	0	1.65816	0	1.43557	0.393186	5.79595
ENSBTAT00000002261	8.02134	7.74337	7.69803	3.97064	3.81968	3.5963	7.89922	8.35046	8.41732	5.59294	5.31637	5.85432
ENSBTAT00000002262	2.35043	2.3143	1.49698	1.32225	0.532101	0.386645	3.792	4.39266	4.05227	3.73451	3.9626	3.5294
ENSBTAT00000002263	0.200843	0.349261	0.42317	0.394395	0.607435	0.524981	0.265761	1.26852	0.77339	2.36794	3.90763	1.64833
ENSBTAT00000002265	0.000195354	0.000300133	0.000339074	5.86158e-05	0.324179	0.000157239	1.17795	1.84891	0.000172302	0.950151	0.000170066	0.000127701
ENSBTAT00000002268	5.0663	5.18361	4.89072	4.82006	4.6372	4.40299	4.14044	4.10773	4.28122	4.31376	4.53707	4.51813
ENSBTAT00000002271	0	0.0613919	0	0	0.220429	0.265911	0	0.124299	0.29573	0.106803	0	0
ENSBTAT00000002274	4.40537	4.03333	4.24631	2.85619	2.88088	3.19678	3.06964	3.35069	3.49626	3.18885	3.16623	3.1967
ENSBTAT00000002276	0.611567	0.697272	0.95412	2.66384	2.40559	2.68367	0.162593	0.230277	0.150058	0.136099	0.494402	0.0338192
ENSBTAT00000002277	3.87875	3.95249	3.78344	4.20054	4.15389	4.34184	3.66355	3.81283	3.6153	4.05841	4.15887	4.01311
ENSBTAT00000002279	5.42225	5.02501	4.71967	6.01396	5.81769	5.83415	5.88407	7.44304	5.80039	8.07646	8.21069	8.1056
ENSBTAT00000002282	0.573656	1.31995	1.38741	0.977368	1.57229	1.31524	1.00583	1.57414	1.60372	1.77113	2.26111	2.29699
ENSBTAT00000002285	0.423484	0.903943	0.319391	0.122464	0.169169	0.132067	0	0	0.254228	1.38374	0.238279	1.15678
ENSBTAT00000002286	4.39176	4.11206	3.29679	2.13125	1.69014	1.9064	4.09593	4.48123	4.16144	3.04037	3.39588	3.00089
ENSBTAT00000002289	2.89154	3.27365	3.04553	3.04676	3.06409	2.89647	3.47162	3.38958	3.20879	3.7334	3.90665	3.75905
ENSBTAT00000002293	3.90005	3.43572	3.62023	1.13136	0.937061	0.990074	4.45483	3.8891	4.12607	1.70536	1.04341	1.15441
ENSBTAT00000002294	3.83743	3.89145	3.53691	4.93946	4.94521	4.72781	3.88537	3.70581	3.9885	4.42549	4.04222	4.21214
ENSBTAT00000002296	4.63803	4.56846	4.30431	3.80967	3.94983	4.19067	4.12635	4.03291	4.37116	3.57071	3.5894	3.47093
ENSBTAT00000002297	1.68433	1.29777	1.35779	3.67402	3.56124	3.54715	2.47053	3.93276	3.28096	4.97134	4.43688	4.2615
ENSBTAT00000002299	0	0	0	0.13174	0.198024	0.0368147	0	0.0486599	0.0613276	0	0	0
ENSBTAT00000002300	4.94063	4.93777	4.85141	2.42982	2.42083	2.64246	5.64179	4.42683	5.00249	2.56842	2.39157	3.09959
ENSBTAT00000002303	5.70879	6.78946	5.6831	3.6956	4.87872	2.9117	0.337469	1.37033	0	0.573986	0.762608	0.217057
ENSBTAT00000002309	3.3261	2.74746	3.01344	2.161	2.31711	1.81625	2.05799	2.76013	2.64512	2.31972	2.08977	2.65428
ENSBTAT00000002311	2.03303	2.49579	2.62223	1.98706	2.1166	2.09814	2.69649	2.49178	2.28636	2.67195	2.41096	3.10541
ENSBTAT00000002315	3.40099	3.2354	3.3496	3.36638	2.87025	2.70461	2.97571	3.26166	3.11481	3.41587	3.14654	3.39091
ENSBTAT00000002316	1.9966	1.96919	1.9609	2.50574	2.90355	2.93588	2.01679	2.39433	2.28357	2.61199	3.09357	2.98007
ENSBTAT00000002317	4.75428	3.75613	3.37733	0.637518	0.452974	0.484914	4.17136	4.29046	3.89825	0.936669	1.34856	1.03585
ENSBTAT00000002319	6.0198	6.02473	5.91455	4.69404	4.9925	4.98935	5.9416	6.33806	6.14436	4.73864	5.06665	4.79502
ENSBTAT00000002323	4.64209	4.39246	4.8546	2.72558	2.99308	2.47424	4.78076	4.96792	4.6481	4.20037	4.05675	4.57803
ENSBTAT00000002324	3.72948	4.06592	4.39298	4.14485	5.231	4.95009	5.00056	4.71478	4.53276	3.81247	4.30987	4.2418
ENSBTAT00000002325	0.304606	0.202851	0.369889	0.112501	0.192514	0.121229	0.146559	0.302376	0.135321	0.414016	0.228998	0.533376
ENSBTAT00000002326	8.27962	7.9842	8.08778	8.95328	8.93328	8.5086	8.61618	8.77672	8.66004	9.22758	9.06353	9.18045
ENSBTAT00000002327	6.1963	6.0863	6.43642	4.53885	4.65708	4.27016	5.35679	4.99618	5.65831	4.72417	4.40416	5.01915
ENSBTAT00000002330	2.69797	2.38604	2.61909	1.7302	1.53365	0.849598	2.71297	2.99625	2.8078	2.79336	2.50001	2.16775
ENSBTAT00000002334	2.49243	2.58441	2.8277	2.28292	2.37015	2.14869	3.08884	0.00380737	0.00494577	0.00337167	2.41997	2.6014
ENSBTAT00000002335	3.96066	3.64364	4.35713	3.25122	2.45555	2.73271	3.33482	2.88097	3.74501	3.40457	2.70315	2.8467
ENSBTAT00000002336	2.41625	3.01891	3.12248	1.67148	1.96509	2.01866	3.00202	1.66403	3.47399	1.83811	1.30447	1.16828
ENSBTAT00000002339	2.08665	1.62535	2.15701	1.99706	2.24596	2.40447	2.00402	1.55175	2.29322	2.52461	2.66248	2.76586
ENSBTAT00000002341	1.45778	1.10236	1.79963	2.3765	1.87839	2.02973	2.64745	3.64116	3.68319	2.29908	3.2771	2.47203
ENSBTAT00000002342	3.23341	3.45166	3.331	2.8882	3.53353	3.82376	2.73297	2.71037	3.10854	2.75181	3.05829	2.8268
ENSBTAT00000002344	4.4772	4.5936	4.45118	4.11641	4.37039	4.76855	4.08694	4.86785	4.6041	4.14731	4.29016	4.2296
ENSBTAT00000002345	6.81272	6.70928	6.59627	5.32132	5.73839	5.57349	7.35028	6.76356	6.92346	6.60603	6.3063	6.96359
ENSBTAT00000002346	0.4727	7.0404e-05	3.68139e-06	2.10635e-05	9.80317e-06	0.558717	0.000393252	0.146591	1.60911	1.27718	0.997774	0.0234098
ENSBTAT00000002349	6.81201	6.857	6.55751	5.6381	5.78336	6.03687	6.43219	6.64777	6.7694	6.11026	6.47468	6.21221
ENSBTAT00000002350	5.04125	4.87095	5.0067	4.58371	4.54998	4.16782	4.36612	4.36358	4.55625	4.29338	4.19795	4.29181
ENSBTAT00000002352	0.645179	0.457044	0.585594	0.339762	0.750868	0.496127	1.32055	1.98514	1.72445	1.03417	1.3442	1.888
ENSBTAT00000002357	0.288037	0.0230697	0.321506	0	1.98298	2.70727	0.0942982	3.60751	0.366581	0	3.96271	3.36416
ENSBTAT00000002359	1.94943	2.21771	2.17493	2.82651	2.20576	2.60552	2.75782	1.97526	2.20303	2.70495	3.5228	2.08118
ENSBTAT00000002360	0.920896	0.829525	0.590935	0.449896	0.383039	0.404699	0	0.0247962	0	0.123864	0	0.0305372
ENSBTAT00000002361	3.26864	3.52175	3.49255	4.46603	4.68189	4.44453	3.84437	3.77307	3.6264	4.63738	4.83458	4.44327
ENSBTAT00000002363	4.48038	4.39375	4.42451	3.49217	3.66057	3.47397	3.58874	3.4462	3.54666	3.18556	2.86009	3.03792
ENSBTAT00000002364	3.7247	2.86138	3.02303	4.87831	4.82159	4.39159	4.20917	3.66983	3.95973	4.22301	4.03249	4.46326
ENSBTAT00000002366	4.60023	4.66339	4.65424	4.77776	4.88749	4.84411	4.56517	4.65599	4.51596	4.39993	4.54489	4.38417
ENSBTAT00000002373	0.0613836	0.0655697	0.0184334	0.771597	0.348782	0.290052	0.112302	0.233271	0.0832617	0.288858	0.259465	0.253974
ENSBTAT00000002374	2.84803	3.01756	3.00608	1.0708	0.808818	1.05203	3.89329	3.64813	3.47311	1.41215	1.26689	1.59599
ENSBTAT00000002375	3.15358	3.19385	3.39704	3.7961	3.29325	3.03589	3.87024	3.50904	3.70789	5.74072	5.73038	5.50593
ENSBTAT00000002376	2.57191	2.74339	2.92544	1.7068	1.66218	1.33232	3.57854	3.44454	3.41691	2.59361	2.197	2.50239
ENSBTAT00000002377	0.667822	0.795207	0.550705	0.933091	0.379712	0.408414	1.32336	0.990102	0.69841	1.63252	1.57893	1.95692
ENSBTAT00000002380	4.87299	4.81482	4.85081	5.08862	5.1089	5.2058	4.21356	4.66044	4.4162	4.28828	4.77538	4.40978
ENSBTAT00000002381	0.0186799	0.0186075	0.0137366	0.00471663	0.000307682	0.000753996	0.975839	0.0294656	0.00931889	0.852905	0.00376362	0.00357425
ENSBTAT00000002383	1.40263	0.968734	1.19389	2.15819	2.47948	2.42367	1.99334	3.14651	1.58693	3.76287	2.43016	3.97042
ENSBTAT00000002384	0.873159	1.11735	0.453766	0	0	0	0.982411	0.237889	0.839031	0	0.560736	0
ENSBTAT00000002385	0.158137	0.24606	0.310335	0.179852	0.108071	0.163057	0.432624	0.736575	0.716134	0.748099	0.617101	1.12027
ENSBTAT00000002387	4.79691	4.6804	4.798	3.27485	3.49083	3.56993	4.96775	4.83275	5.08916	4.25709	4.40431	4.40779
ENSBTAT00000002389	3.1519	3.29708	3.50635	3.23387	3.25442	3.3985	4.11652	4.00614	4.26402	4.9699	5.25557	5.08576
ENSBTAT00000002390	2.46973	2.04639	1.77794	1.89637	1.96526	1.85359	2.70622	1.9849	2.45256	2.78154	3.20786	2.86763
ENSBTAT00000002392	0.0868623	0.137058	0.0774086	0.147569	0.130977	1.03325	0	0.0729446	0	0.12224	0	0.118032
ENSBTAT00000002395	4.36078	4.48132	4.45533	4.70565	4.90041	4.67528	4.65614	3.91853	4.26306	4.73384	4.53462	4.57515
ENSBTAT00000002397	2.41566	2.78591	2.6449	2.86522	2.8237	2.54226	2.73081	3.13426	2.80512	3.32155	3.30856	3.2292
ENSBTAT00000002398	3.50743	3.51278	3.55449	5.50099	6.62986	5.83311	3.89433	4.56208	4.39312	5.24384	5.61007	5.99846
ENSBTAT00000002400	0.294414	0.12561	0.852008	0.263774	0.237139	2.08326	1.97705	1.12392	2.15581	0.499865	0.68476	0
ENSBTAT00000002402	0.915289	1.04724	1.4932	1.16826	1.07896	1.21934	0.206531	0.223324	0.234815	0.0674516	0	0.0647337
ENSBTAT00000002404	3.40839	3.27762	3.50603	2.16359	2.23323	2.20532	3.47856	3.64466	3.98514	3.88228	3.59455	3.61993
ENSBTAT00000002408	3.01085	3.1534	2.92005	2.78538	2.55033	2.42602	2.71497	2.95455	2.93315	2.46423	2.32585	2.294
ENSBTAT00000002416	0	0.0557146	0.0615087	0	0	0	4.3826e-05	2.09084e-05	2.82864e-05	4.75765e-06	3.3154e-06	1.56684e-05
ENSBTAT00000002418	3.69529	3.76056	3.83491	3.61579	3.82501	3.54871	3.53543	3.22204	3.45588	3.97137	3.9258	4.1083
ENSBTAT00000002419	7.23969	7.32123	7.34888	5.22765	5.53191	4.89684	6.83262	5.87249	6.16423	4.73255	5.03913	5.07453
ENSBTAT00000002420	6.01147	6.0712	5.74653	4.56352	4.64226	4.50431	5.94772	6.20049	5.93967	4.1659	5.40716	4.94266
ENSBTAT00000002422	7.21453	7.45171	7.34762	7.1177	7.31502	7.17202	4.61596	2.76949	4.70349	3.43707	2.80662	2.37845
ENSBTAT00000002427	0.196506	0.233492	0.175755	0.460439	0.715643	0.154403	0.27051	0.621659	0.502766	0.329439	0.482885	0.600983
ENSBTAT00000002428	5.73749	6.12648	5.75651	5.44326	5.63423	5.58859	5.63155	5.63102	5.41673	5.1479	5.12565	5.15946
ENSBTAT00000002429	5.62502	3.66682	1.21621	3.07917	3.39842	4.54014	2.25743	0.828056	1.51131	1.28185	1.68632	0.986091
ENSBTAT00000002431	6.37085	5.80076	5.5089	0.0446533	0.115174	0	6.25126	5.46796	5.85464	0.729085	1.54813	1.3792
ENSBTAT00000002433	3.30544	2.95462	2.70347	2.55132	1.90684	2.13986	4.11127	3.42124	3.71906	2.26962	2.45789	2.37821
ENSBTAT00000002434	4.23347	3.90755	3.82027	4.76037	4.53393	3.21456	3.78521	3.62137	3.81074	4.62218	4.70278	5.4719
ENSBTAT00000002438	3.21492	2.53259	2.79491	2.71671	2.20818	2.27114	2.35232	2.36805	2.64425	2.52042	2.41437	2.76231
ENSBTAT00000002440	0.0376993	0.0303239	0.129598	1.48268	1.71952	1.87829	0.122601	0.341422	0.166124	0.590741	0.640206	0.782775
ENSBTAT00000002444	0	0.774246	0	1.54014	1.69171	1.29576	0.63564	0.273226	1.19692	1.24394	0	0.227634
ENSBTAT00000002446	3.07833	2.72145	2.54921	3.01918	2.62507	2.70596	3.09362	1.65499	1.76191	2.51463	2.1757	2.54094
ENSBTAT00000002448	2.74634	2.7457	2.04429	1.88479	1.28961	1.31606	2.593	2.75322	3.24293	2.63245	2.90573	2.62807
ENSBTAT00000002451	5.22014e-05	0	4.36045e-05	3.46247e-05	2.39472e-05	3.28716e-05	1.08405	0.376655	0.358206	0.814447	3.1879e-05	0.451689
ENSBTAT00000002453	3.74379	4.09589	4.26476	3.11197	3.48231	3.62716	3.71972	3.28816	3.96814	3.43095	3.00793	3.60854
ENSBTAT00000002456	2.93599	2.74313	2.90589	3.34716	3.3294	3.27934	3.32516	3.31198	3.40031	3.24576	3.73455	3.58303
ENSBTAT00000002457	0.56668	0.312013	0	1.79418	1.7224	1.9876	0	0.537727	0.816302	2.30387	1.51859	2.41453
ENSBTAT00000002459	5.63692	5.54759	5.43027	5.47713	5.15353	5.21008	5.46149	5.27489	5.58017	5.05155	5.37592	5.19069
ENSBTAT00000002461	0.00017994	0.000780127	0.00030559	2.29299e-05	0.000242313	0.000124091	0.000601623	0.000254779	0.856736	0.000134196	0.00010777	0.000920741
ENSBTAT00000002462	4.39168	4.30605	4.05149	3.28437	3.20154	3.09272	4.47717	3.74947	4.15097	3.09306	3.18763	3.01912
ENSBTAT00000002464	3.71008	3.73404	3.86452	3.60404	3.70022	3.3275	4.91196	4.52288	4.29181	3.26959	3.05326	3.08286
ENSBTAT00000002466	3.29346	3.35652	3.22826	3.37169	3.14984	2.94333	3.45939	3.28484	3.44322	2.81652	2.83141	2.91519
ENSBTAT00000002468	0.877989	0.939108	1.53316	1.67024	1.64569	2.11387	1.30204	0.96552	0.732585	1.48356	1.4273	1.48589
ENSBTAT00000002473	0.423022	0.376637	0.350487	0.256595	0.407255	0.342638	1.08232	1.5225	1.04157	0.43033	0.368994	0.321657
ENSBTAT00000002475	2.63849	3.06597	2.83818	3.12936	3.15723	3.13513	2.9707	2.73077	2.57805	2.77335	2.71635	2.75556
ENSBTAT00000002476	2.98918	3.05558	3.28991	2.56699	2.61739	2.32583	2.9397	2.89453	2.98905	3.33105	2.55612	2.80816
ENSBTAT00000002478	0.493493	0.640184	0.88239	1.01155	1.06314	0.747628	0.59735	0.592806	0.354903	1.14906	0.739412	1.13465
ENSBTAT00000002483	2.46023	2.37903	2.78723	1.02149	2.44653	1.45684	0.234661	0.352908	0.0759573	0.264787	0.50133	0.452268
ENSBTAT00000002488	3.47988	3.29611	3.44071	3.13321	3.21785	3.41317	1.96434	2.18077	1.828	1.48563	1.54188	1.86824
ENSBTAT00000002491	5.78814	5.96569	5.95582	5.66519	5.44983	5.72995	5.67807	5.55573	5.50174	5.30353	5.27146	5.2415
ENSBTAT00000002492	0	0.629845	0	0	1.06424	0	5.15538	0.173583	4.11164	2.63598	0.841113	1.91998
ENSBTAT00000002494	0	0.216501	0.0998228	0.0652538	0.0575186	0.406234	0.185397	0	0	0	0	0.184516
ENSBTAT00000002495	4.60339	4.18419	4.22968	3.18959	3.45509	3.24302	4.00842	4.15321	4.12429	3.46896	3.954	3.73494
ENSBTAT00000002496	0.352623	0.270585	0.275782	0.0320948	0.0828665	0.101758	0.389865	0.671859	0.952785	0.471065	0.438451	0.276162
ENSBTAT00000002500	2.28304	2.37102	2.51458	2.88547	2.40446	2.78524	2.80421	2.18338	2.04512	2.83486	2.60221	2.71848
ENSBTAT00000002501	0.186791	0.24467	0.307034	0.29823	0.190906	0.487009	0.683343	0.800224	0.282832	0.607983	0.306391	0.481756
ENSBTAT00000002506	6.43269	6.24146	6.15871	4.57567	4.4607	4.07432	7.07173	7.05362	7.51417	5.2732	5.71441	5.66938
ENSBTAT00000002508	5.4919	5.26353	5.05024	5.78869	5.49946	5.26413	5.63361	6.07163	5.24258	5.78344	5.82002	5.76805
ENSBTAT00000002512	3.73203	3.94534	4.01043	2.94782	2.8495	2.60045	3.87381	4.00794	3.96825	4.21307	3.87458	4.09709
ENSBTAT00000002513	7.93567	7.62612	7.76338	6.068	6.58075	6.15056	7.34869	7.16006	7.4533	5.95718	5.59769	6.07571
ENSBTAT00000002520	0.0441379	0.292067	0.659177	6.09276	6.4196	5.59458	3.26017	0.857844	2.86899	5.41023	5.00345	4.83471
ENSBTAT00000002522	0.901109	1.08176	0.945868	1.77306	1.7104	1.93175	1.31186	0.839637	0	1.63119	0.353996	0.175698
ENSBTAT00000002523	3.39397	3.48361	3.58287	3.03782	2.83263	2.86256	2.81017	2.57923	2.9505	2.41515	1.99824	2.53052
ENSBTAT00000002525	6.21103	5.71957	5.23658	0.441483	0.711075	0.895415	6.04739	5.60691	6.59524	2.62551	1.54675	3.09879
ENSBTAT00000002529	0.413855	0.616887	0.830258	0.335633	0.453847	0.359367	2.08589	3.01712	2.37467	1.0827	1.56531	0.000278824
ENSBTAT00000002532	5.19712	5.12828	4.94251	4.95151	4.6976	4.63516	4.95009	4.49433	5.09676	4.67247	5.14249	4.92106
ENSBTAT00000002533	2.35337	2.55786	2.66475	1.68002	1.67252	1.52353	2.92482	2.6212	3.01941	1.90066	2.47592	2.01843
ENSBTAT00000002535	1.53946	2.3668	1.80795	2.71825	3.03778	2.89041	2.57789	2.93858	2.64864	2.67447	2.41032	2.96605
ENSBTAT00000002542	3.96549	4.08226	3.98617	2.65332	3.19626	2.39001	4.50313	3.37729	3.24687	2.59137	3.12124	2.4376
ENSBTAT00000002544	2.57798	2.45247	1.89407	2.73111	2.67501	2.68075	2.7657	2.6685	2.8478	2.5475	3.06239	2.69747
ENSBTAT00000002548	4.0113	3.31763	3.32196	5.24194	4.43745	4.09803	3.78017	4.65479	4.1962	5.31635	5.7143	5.13936
ENSBTAT00000002549	4.74109	4.72211	4.87716	4.20617	4.02526	3.59618	4.89638	4.15477	4.54947	3.60032	3.51957	3.78047
ENSBTAT00000002552	0	0.202424	0.077983	0	0.291012	0	0	0	0.0922444	0.0628941	0	0
ENSBTAT00000002553	3.80213	3.86913	3.39267	5.48248	4.91399	5.31497	3.20296	4.08061	3.69333	5.69235	5.74636	4.96451
ENSBTAT00000002554	2.98033	3.22133	3.22216	4.07829	4.01569	4.28825	3.21377	3.15343	2.93733	3.24049	3.31436	3.19323
ENSBTAT00000002556	4.19073	2.99455	2.98653	4.43869	2.9875	2.76242	3.97257	3.71864	3.50729	3.421	3.84139	3.53519
ENSBTAT00000002557	0.23607	0.326227	0.407268	0.0785657	0.27536	0.417012	0.439917	0.0974676	0.246837	0.0724288	0.0746187	0
ENSBTAT00000002564	0.580601	0.436625	0.891603	0.229882	0.270971	0.510864	0.993609	1.03875	1.11514	0.0810756	0.48287	0.310185
ENSBTAT00000002566	3.89513	3.86639	3.83309	5.29535	5.09987	5.16782	3.43018	3.43306	3.12842	4.39201	4.38061	4.37055
ENSBTAT00000002571	0.246194	0.200816	0.260927	0.0602235	0.314342	0.524069	0.506848	1.40564	0.660156	0.242759	2.20089	0.985147
ENSBTAT00000002572	1.92297	2.488	1.83719	2.39242	2.51953	2.95556	2.00157	1.89175	1.68321	2.00914	1.69802	2.08235
ENSBTAT00000002573	5.28716	5.34596	5.40698	5.80233	5.85753	5.64063	5.91325	6.02895	5.97178	6.1098	6.30929	6.33188
ENSBTAT00000002574	0	0.0650337	0	0.0926403	0.0415745	0	0.178039	0.416637	0.31242	0.362572	0.172461	0.25892
ENSBTAT00000002578	3.06557	2.47525	2.26529	3.91614	3.95877	4.92	3.74015	3.65739	3.50177	4.55178	4.74155	4.58432
ENSBTAT00000002582	2.39232	1.79384	2.05572	4.96634	4.63883	4.37081	2.3628	2.36726	1.95233	2.95229	2.73273	2.80143
ENSBTAT00000002583	6.08899	5.71832	5.8247	2.69782	2.78435	2.9834	5.48846	5.48484	6.0409	3.85097	4.13371	3.90298
ENSBTAT00000002587	4.85752	5.10861	4.92569	4.22341	4.64184	4.28073	3.9911	3.58612	3.86279	3.85048	3.50396	3.31923
ENSBTAT00000002589	0	0.158231	0	0	0.121401	0.932372	0	0.0369666	0	0	0.0164989	0
ENSBTAT00000002592	2.31553	2.72209	2.60939	2.45773	2.38676	2.89024	1.69432	1.92795	1.63617	2.03325	2.6197	1.75404
ENSBTAT00000002594	7.34942	6.91136	6.81761	4.96466	4.70764	4.37031	5.11651	4.51251	5.04796	2.95327	4.1965	2.73172
ENSBTAT00000002597	4.72728	4.60382	4.58408	4.16251	4.52418	4.0821	3.3097	2.67995	2.88494	2.87423	3.13235	3.61254
ENSBTAT00000002600	5.41657	4.12826	3.31298	7.5122	7.43474	6.88858	4.72643	7.27761	4.38967	4.7912	5.22408	4.78436
ENSBTAT00000002604	2.64606	3.0489	2.58607	3.32398	3.31582	3.16538	3.29271	3.35526	3.27542	3.73028	3.58443	3.70077
ENSBTAT00000002605	0.0614682	0.274577	0.388686	1.24767	0.786945	1.75608	1.12806	0.4038	0.669462	0.352148	0.251748	0.305743
ENSBTAT00000002607	5.24002	5.30729	4.98411	6.01994	6.3955	5.67863	5.71746	5.32982	5.37164	5.97633	6.09616	6.22683
ENSBTAT00000002609	5.3903	5.19044	5.38765	4.90274	4.89105	4.81557	5.69917	5.23626	5.5645	4.95672	5.16351	5.29263
ENSBTAT00000002616	8.11782	7.82177	7.84314	6.47141	6.39666	5.83961	7.46946	7.07549	7.56625	6.76732	6.41344	6.79596
ENSBTAT00000002617	0	0.0663972	0	0.831401	0.563792	0.909491	0	0	0	0.0589642	0	0.264203
ENSBTAT00000002618	3.09585	2.5505	2.60618	4.38867	3.43242	4.0272	3.18943	3.11471	2.99361	3.76793	3.62869	3.54324
ENSBTAT00000002619	2.65979	2.99455	2.4696	2.88314	2.62497	2.67627	3.07285	2.98959	2.85544	2.86959	2.63316	3.00197
ENSBTAT00000002623	2.72347	1.70044	2.25859	0	0.0833506	0	2.63463	3.48776	3.40489	0	0	0
ENSBTAT00000002624	4.28829	4.24963	4.01294	3.83369	3.76022	3.66138	3.81036	4.11076	4.19718	3.2315	3.78254	3.47524
ENSBTAT00000002625	1.5845	1.90023	2.23101	1.48898	3.78291	2.84658	2.37672	3.58463	2.13909	2.70486	3.99072	2.68351
ENSBTAT00000002626	7.80513	7.70312	7.57112	8.28153	8.59212	8.46067	8.72947	9.57309	9.27559	8.81536	9.44403	8.75535
ENSBTAT00000002627	0	0.828853	1.13892	0.360028	0.53902	0	0.293718	0.221184	0	0.880437	2.00039	0.562038
ENSBTAT00000002628	4.87796	4.22402	3.79738	4.54968	4.40411	4.61558	4.25861	3.53447	4.09093	2.89565	2.81363	2.49043
ENSBTAT00000002631	0.5828	0.765682	0	0.373439	0.337589	0	3.61167	2.36212	3.32504	3.04182	2.96873	2.27716
ENSBTAT00000002634	4.39427	4.14075	3.99877	3.47573	3.42475	3.36251	4.46827	3.69794	4.29649	2.52614	2.20628	2.77048
ENSBTAT00000002637	3.42702	3.28868	3.7209	1.79058	2.06603	1.83649	2.0109	2.13346	1.84365	2.11644	2.11782	2.01165
ENSBTAT00000002640	7.07371	6.66548	6.8229	0.646043	1.12786	0.780413	6.12236	5.64738	7.20521	0.917311	1.31291	1.18589
ENSBTAT00000002642	8.50788	8.18742	8.25909	8.49887	8.45978	8.46217	8.79898	9.36295	8.8237	8.84379	9.06137	8.65815
ENSBTAT00000002645	1.01535	0.535344	1.22788	1.37671	1.10928	1.23688	1.26464	2.65529	1.49043	2.45613	1.38285	2.6123
ENSBTAT00000002646	3.32283	3.07049	3.09087	3.33964	2.86217	2.7603	2.60633	2.56623	2.79463	3.38487	3.15624	3.03215
ENSBTAT00000002648	3.40612	3.39685	3.33372	3.30559	3.61431	3.42988	4.19181	3.08278	3.68874	2.14763	3.05732	3.04107
ENSBTAT00000002650	5.51858	5.32073	5.32547	5.15187	5.04035	5.02616	5.59669	5.19624	5.68642	5.06347	4.92442	5.06562
ENSBTAT00000002651	7.23559	7.25951	7.17852	2.72142	2.05505	1.58052	6.16878	4.68329	5.51331	2.81995	2.64366	2.85229
ENSBTAT00000002652	0.410644	0.762709	0.757816	1.92079	1.56074	1.94436	0.490288	0.872601	0.519719	2.96302	3.47388	3.04542
ENSBTAT00000002653	5.77643	5.58473	5.52669	6.04239	5.90775	5.81889	5.24808	5.50688	5.34079	5.88767	6.01912	6.01685
ENSBTAT00000002654	6.681	6.62131	6.52195	8.00604	7.41841	7.22676	7.52009	6.30725	7.40838	6.89961	7.29987	6.56146
ENSBTAT00000002656	3.99717	3.93237	3.66141	1.49676	1.55757	1.20655	3.16842	2.79913	2.74513	1.52524	1.07044	1.73899
ENSBTAT00000002658	3.88786	2.76724	3.16534	3.44189	2.93454	2.94395	4.50279	5.15529	5.01219	3.86758	4.09836	3.90952
ENSBTAT00000002662	3.03281	3.01892	2.60638	3.63996	2.78917	2.47538	2.72677	1.90219	2.36353	1.76472	1.33836	1.89386
ENSBTAT00000002664	3.54056	3.73444	3.68424	2.62508	3.6229	3.46744	4.26758	4.22419	3.97466	2.87187	3.00023	3.00244
ENSBTAT00000002665	1.81281	1.97993	1.76915	3.0049	3.134	3.57103	2.29077	2.69822	2.1192	2.95505	3.01026	2.7672
ENSBTAT00000002666	9.58404	9.63408	9.49617	9.22469	9.20119	9.11021	10.2078	9.93056	10.2105	9.80392	9.52618	9.3941
ENSBTAT00000002668	0.0576134	0.0690667	0.100745	3.80281	0.897622	1.70985	0.155977	0.157863	0.483571	1.85944	1.20341	1.1167
ENSBTAT00000002674	5.91284	5.47894	5.29693	6.26194	6.04561	5.86754	6.17209	6.79804	6.17726	8.08841	8.06822	8.76525
ENSBTAT00000002680	1.99811	1.75302	1.50239	1.9984	1.90396	1.7468	2.6544	2.82904	2.65727	3.03767	3.03416	2.84319
ENSBTAT00000002681	3.36623	3.32724	3.59411	4.52464	5.21313	4.45415	4.04624	2.569	3.66906	2.31618	2.79185	2.01319
ENSBTAT00000002682	2.43249	2.81431	2.87413	3.63656	3.76362	3.68302	2.77091	2.89312	2.78738	3.01822	3.09839	3.09784
ENSBTAT00000002684	5.15519	5.05497	4.73461	5.02084	4.68167	4.10432	6.46022	5.87082	6.21817	4.29998	4.69361	4.8801
ENSBTAT00000002687	4.28009	4.40173	4.52405	3.93387	3.92144	3.64566	4.19234	3.71552	4.18903	4.40571	4.19161	4.22967
ENSBTAT00000002689	3.39233	3.51503	2.66879	5.21788	6.4789	4.23484	5.15331	5.68976	4.44507	4.78511	5.21718	4.76152
ENSBTAT00000002690	2.48638	1.31319	1.47654	0.107144	0.0943273	0.0781242	2.32238	2.36238	2.82599	0.171289	0.387993	0.553186
ENSBTAT00000002691	4.68393	4.43242	5.06895	6.17659	6.55031	6.29825	5.7749	6.32031	5.60875	6.47719	5.98562	6.13714
ENSBTAT00000002695	4.25597	4.27104	4.28186	4.47561	4.652	4.84995	4.12028	4.19812	4.17062	3.81523	3.88406	3.79448
ENSBTAT00000002697	4.1611	3.83209	3.4538	2.51757	2.92208	2.64975	3.91612	4.36992	3.91578	2.97917	3.32551	3.00134
ENSBTAT00000002701	2.61716	2.75264	2.55422	1.65311	1.79747	1.57217	3.13753	2.76524	3.08611	2.44806	2.42151	2.19116
ENSBTAT00000002703	1.70672	1.52755	1.23046	2.15101	2.16055	1.86258	1.8712	3.01964	0.940967	2.39434	2.82754	2.08767
ENSBTAT00000002705	2.04291	2.38248	1.98438	1.82218	1.8486	1.88315	2.33836	2.77214	2.49237	2.44301	2.63436	2.21631
ENSBTAT00000002707	7.49323	7.513	7.74251	3.82718	3.99548	3.68622	6.79223	6.45698	7.14867	3.93045	4.06474	3.95864
ENSBTAT00000002710	5.57514	5.18941	5.18414	5.37432	4.94935	4.58049	4.95592	4.63661	4.82249	4.70389	4.26155	4.78297
ENSBTAT00000002712	0.193752	0.215973	0.106426	0.0465831	0.0409499	0.0253931	0.0904967	0	0.37547	0.312233	0	0
ENSBTAT00000002715	0.351546	0.788854	0.608792	0.154425	0.136586	0.397983	0.576311	0.955829	0.616716	0.151909	0.0805058	0.0748998
ENSBTAT00000002717	0.951497	0.781861	0.922353	1.23822	1.32035	1.5116	1.8869	2.17781	1.5552	2.48073	2.35115	2.34166
ENSBTAT00000002720	0.477499	1.09706	1.2182	1.81437	1.73761	1.41561	1.75925	1.93145	1.90522	3.15851	3.83411	2.8551
ENSBTAT00000002725	3.8144	3.86032	3.59186	1.73144	1.19671	2.09802	2.76291	3.10435	3.19997	3.76222	3.59045	2.89375
ENSBTAT00000002726	1.90354	2.02056	1.97803	2.11148	2.3194	2.23358	2.06299	2.30452	1.97107	1.58587	2.18309	1.78574
ENSBTAT00000002731	0	0.13761	0.0777267	0.148175	0	0.159362	0.0995726	0.554648	0.259891	0.736441	0.677289	0.378181
ENSBTAT00000002733	2.01354	2.40807	2.28537	2.0988	2.25328	2.13997	2.17679	2.6871	2.35587	2.84379	3.00282	2.68796
ENSBTAT00000002738	3.71433	3.52435	3.55805	4.43394	4.57983	4.17884	3.70154	3.04983	3.05696	3.94899	4.48947	4.25468
ENSBTAT00000002742	1.54946	1.52675	1.23056	0.578127	0.371804	0.527229	1.79448	1.56003	1.24647	0.860913	1.05253	1.2013
ENSBTAT00000002747	0.136679	0.162999	0.234402	0.0986726	0.0699107	0.126912	0.983313	1.8181	1.28402	1.59195	1.61314	1.66785
ENSBTAT00000002748	2.99857	3.28447	3.39603	2.46579	2.86937	3.08205	4.51934	4.23947	4.72413	3.62994	3.51306	3.60348
ENSBTAT00000002749	1.92313	1.85749	2.19798	1.26765	1.2588	1.05333	2.45656	2.14383	2.61692	1.80486	1.86036	1.48144
ENSBTAT00000002751	2.18988	2.32483	2.23703	1.17194	1.00218	1.06432	1.94353	2.61168	2.14622	0.766984	1.76299	0.885438
ENSBTAT00000002753	2.54634	2.57296	2.86176	1.65225	1.79311	0.740342	3.9688	1.84203	3.02174	1.83681	1.44457	1.57383
ENSBTAT00000002760	0.610157	0.420192	0.598613	0.20375	0.714944	0.298015	0.565934	0.384977	0.684992	0.334871	0.255022	0.480359
ENSBTAT00000002767	0.258746	0	0.0615836	0.480943	0.291523	0.242762	1.19273	2.03201	0.548749	0.605341	0.0510069	0.709322
ENSBTAT00000002770	5.25768	5.41939	5.26009	4.13245	4.66487	4.44463	5.0467	5.65519	5.29632	3.74303	4.14251	3.74941
ENSBTAT00000002771	1.05468e-06	1.67099e-06	1.72086e-06	3.3737e-07	1.62518e-07	3.41672e-07	3.9779e-07	1.40894e-07	5.51177e-07	2.46867e-07	1.09455e-07	2.44286e-07
ENSBTAT00000002776	0.395665	0.744468	0.725686	0.0843203	0.454216	0.584164	0.212193	0.0408661	0.0515758	0.135598	0.172787	0.360101
ENSBTAT00000002778	3.35603	3.47891	3.47741	2.73049	2.91127	2.30143	3.08427	3.16813	3.55656	3.17933	3.75256	2.9563
ENSBTAT00000002779	6.02857	5.15763	4.60728	5.49918	4.50383	4.89749	5.8967	5.76188	5.30097	5.26644	4.26388	4.37943
ENSBTAT00000002783	2.65249	3.15232	3.12231	3.32099	3.20966	2.50076	3.25464	2.93617	3.33262	3.74612	3.54009	3.75625
ENSBTAT00000002784	5.20167	5.27616	5.17718	5.52316	5.73979	6.10648	4.84875	5.03631	5.34037	4.9542	5.3178	5.05482
ENSBTAT00000002785	1.23846	0.958575	1.27417	4.22334	3.28033	5.05392	2.78742	2.81854	2.8726	4.45565	4.4183	4.49884
ENSBTAT00000002787	6.35256	6.0022	5.48914	0	0	0.294939	5.32731	4.21557	4.3417	0	0	0.0270799
ENSBTAT00000002789	0	0.123255	0	0.83679	0.714946	0.435571	0	0.253872	0	0.491109	0.117625	0.211636
ENSBTAT00000002790	9.49362	9.27431	8.88977	0.0636654	0	0	9.15556	8.73399	9.08277	0.0778298	0.263673	0.370278
ENSBTAT00000002792	4.30619	4.37239	4.35445	2.1184	2.20536	1.95823	3.51725	3.47632	4.28793	3.22245	2.88616	3.03606
ENSBTAT00000002795	0	0	0	1.39361e-10	2.09824e-12	0	0.0577189	5.65451e-08	1.24877e-07	2.64688e-08	9.33631e-08	2.99931e-08
ENSBTAT00000002800	0.404612	0.391525	0.298569	0.289312	0.276422	0.263292	0.328445	0.587916	0.13836	0.494584	0.129366	0.204665
ENSBTAT00000002809	0.0911716	0	0.0812661	0.29481	0.137615	0.0576825	0.104227	0	0	0	0	0.238353
ENSBTAT00000002817	1.94396	1.94737	2.21675	2.49163	2.26781	2.86075	2.52252	2.83058	2.80103	3.22943	2.95883	3.09997
ENSBTAT00000002822	2.30586	2.38508	1.89027	2.18445	1.22226	0.78346	1.60031	3.5167	2.87368	3.14951	5.13057	4.29975
ENSBTAT00000002823	2.65471	1.94984	1.97944	1.40614	1.49163	1.43073	2.9258	2.54752	2.41736	1.88183	1.82319	1.55776
ENSBTAT00000002824	2.39542	2.68516	2.59683	2.92371	3.12968	2.93145	2.77693	2.83288	2.80651	3.16655	2.90389	3.04883
ENSBTAT00000002826	0.852116	1.23761	1.44195	0.409806	0.698824	0.265958	0.950427	0.184495	0.331079	0.158103	0	0.534421
ENSBTAT00000002827	0.62098	1.25216	1.49332	2.26747	1.83544	2.45681	1.47529	1.61136	1.43015	1.46226	2.11167	2.00432
ENSBTAT00000002828	8.57527	8.72829	8.70144	6.11901	6.68299	6.83703	7.81865	7.40852	7.47815	5.00046	5.04453	4.81606
ENSBTAT00000002831	6.2825	6.41031	5.85653	4.30957	4.53224	4.53597	5.26667	3.965	4.35351	3.40911	3.79944	3.62632
ENSBTAT00000002832	3.18798	3.0841	3.29069	3.21639	3.10861	2.6949	2.69862	3.14757	3.20762	3.40743	3.66088	3.31648
ENSBTAT00000002833	5.07025	5.06792	5.09604	6.11359	6.00231	6.10902	5.61782	5.5018	6.0059	6.36313	6.40722	6.35964
ENSBTAT00000002834	0	0	0	0.200385	0.233916	0.401924	0.135863	0	0.711641	0.743743	0.533435	0.236589
ENSBTAT00000002836	1.61344	1.40812	1.7746	1.32546	1.43265	1.51267	1.71816	1.91898	1.72253	2.38586	2.03127	2.5518
ENSBTAT00000002838	0.373983	0.187163	0.311265	0.0399879	0.0176661	0.10576	0.414114	0.0843024	0	0.229439	0.40043	0.136171
ENSBTAT00000002839	2.03518	1.85845	1.76358	2.77919	2.92085	2.78016	2.37843	2.28425	2.57354	2.09177	3.09934	3.29852
ENSBTAT00000002840	1.82208	1.04118	1.63528	2.18271	1.94482	1.9779	2.05097	3.11431	1.80283	3.31522	3.72855	3.33763
ENSBTAT00000002841	5.00238	5.05179	5.21142	4.56916	4.7247	4.89389	4.72679	4.72203	4.87238	4.60156	5.03827	4.74262
ENSBTAT00000002843	5.76961	5.37369	5.76578	5.21055	5.28872	5.09103	5.86419	5.37016	5.17233	4.14976	5.20704	5.54846
ENSBTAT00000002844	3.89653	3.74856	3.60479	2.87194	2.79245	2.0535	4.54096	4.44553	4.42126	2.9552	3.07762	3.18295
ENSBTAT00000002846	6.26416	5.90833	5.80595	5.20437	4.95619	4.73161	2.70129	3.00315	3.05334	2.55316	3.01506	2.92527
ENSBTAT00000002850	0.336377	0.707766	0.433227	0.303867	0.355372	0.324138	0.954982	0.760045	1.66583	0.13354	0.688742	0.650131
ENSBTAT00000002852	8.37161	8.08474	8.21742	7.05531	7.09018	6.93724	8.47298	7.29973	7.9844	6.76531	6.5063	6.95707
ENSBTAT00000002854	2.57821	2.5818	2.54776	1.80415	2.1181	2.21804	2.33427	2.63725	2.44475	2.44213	2.4582	2.40827
ENSBTAT00000002858	0	0.176424	0.119469	0.175947	0.155578	0.0842602	0.150189	0	0.0938195	0.125639	0.160177	0.0615784
ENSBTAT00000002860	2.74818	2.72602	2.61468	4.01029	3.80156	3.29424	3.53232	3.59636	3.39743	4.11398	4.10099	4.07861
ENSBTAT00000002861	4.99977	5.01017	4.67836	4.46467	4.42917	4.48577	4.32355	4.55457	3.95737	3.83269	3.94965	4.02891
ENSBTAT00000002865	1.52974	1.90001	2.02534	0.744205	0.799207	0.860245	1.54077	1.99146	2.20264	2.10329	2.21491	1.91752
ENSBTAT00000002866	0.266721	0.0782644	0	0	0.140741	0	1.17342	0	0.324611	0.286421	0	0.0659794
ENSBTAT00000002867	2.99576	2.18361	2.24049	4.43385	4.05183	4.54914	2.42882	3.77871	2.3132	3.62858	4.00105	3.76384
ENSBTAT00000002868	3.49255	5.13776	4.92783	0	0	0	4.73858	3.55988	4.13099	0.0443328	0	0
ENSBTAT00000002872	3.12268	3.00168	2.78284	4.58988	4.70017	4.67522	4.07744	3.86057	3.81353	4.83963	5.0559	4.87455
ENSBTAT00000002876	3.27242	3.36084	2.89929	4.25566	4.69052	4.13857	2.9012	2.70977	3.34563	3.20799	3.29098	3.28836
ENSBTAT00000002878	6.709	6.35835	6.40447	2.29978	2.67497	2.5689	6.08192	5.3839	6.20192	2.61024	2.51572	2.37645
ENSBTAT00000002882	5.769	5.62608	5.6123	4.79843	4.22156	4.39331	5.70627	5.56952	5.77366	5.03877	4.94516	4.98819
ENSBTAT00000002883	1.68029	1.95421	2.26344	1.50888	2.32077	1.7726	2.83955	3.1221	3.11433	2.93404	3.74341	3.00831
ENSBTAT00000002887	3.19721e-05	1.07035	0.731685	1.69551	1.21437	1.97424	1.73063	1.71698	1.26971	0.951671	1.89542	1.54483
ENSBTAT00000002890	5.09676	4.71117	4.66966	4.08741	4.02239	3.43173	5.0964	5.73864	6.12459	4.67852	5.39748	5.57889
ENSBTAT00000002891	2.24643	2.6466	2.70646	2.17841	2.53306	2.6677	3.70199	4.08974	2.89243	2.38472	2.09847	2.08311
ENSBTAT00000002893	5.31526	4.99865	5.16208	5.16666	5.64653	5.04063	5.22548	5.09269	5.29084	5.01569	4.99387	5.21425
ENSBTAT00000002894	0.674547	1.10424	1.4864	1.43007	1.39871	1.64439	1.70365	3.45723	1.79899	2.27802	1.24909	2.5526
ENSBTAT00000002896	3.97816	4.16525	4.03574	3.72356	3.71828	3.40884	4.78063	5.39389	5.11201	3.98803	4.49378	4.46424
ENSBTAT00000002897	4.03343	3.96278	3.39364	2.4505	2.46521	2.11073	3.31719	3.44704	3.79375	2.6466	2.9232	3.26204
ENSBTAT00000002904	3.92916e-06	0.946764	0.388033	0.198802	4.76314e-07	1.67647e-06	8.23502e-06	0.201211	0.409582	0.000125399	0.342906	0.192106
ENSBTAT00000002908	0	0	0	0.0854279	0	0.0917705	0.16557	0	0	3.66646	0.109604	0.371364
ENSBTAT00000002909	0	0.676291	0.139827	0.0469535	0.081793	1.53296	0	0.252	0.164275	0	0	0
ENSBTAT00000002911	0	0.146495	0.271301	0.36239	0.965509	1.02133	0.460248	0.408128	0.897676	0.576119	0.636987	1.21536
ENSBTAT00000002913	2.15882	2.79679	2.60754	2.72123	2.8385	2.11074	3.0206	2.44268	1.73567	2.43877	2.48214	2.16439
ENSBTAT00000002914	0.797505	0.885403	0.357462	1.08247	0.151122	1.0019	1.45069	1.8637	1.55825	2.94191	3.7762	3.39136
ENSBTAT00000002916	0.0636709	0.1952	0.11121	0	0.374633	0.258428	1.60892	0	1.59773	0.467202	0.0921396	0.604621
ENSBTAT00000002922	5.93036	5.59925	5.49697	4.11063	4.1501	3.81906	5.15873	4.8066	5.16751	4.30559	4.52064	4.49789
ENSBTAT00000002925	0.448891	0.315246	0.405107	0.144726	0.488921	0.963155	0.188258	0.438867	0	1.79441	0.781611	1.80937
ENSBTAT00000002929	1.83632	1.55534	1.89624	4.50432	3.04766	2.97713	2.20061	2.63545	2.13749	2.57874	2.73328	2.5432
ENSBTAT00000002932	4.86646	5.0032	4.72416	3.99395	4.342	4.1625	5.02907	4.95213	5.03273	2.90415	3.46998	3.51518
ENSBTAT00000002933	6.39911	5.97913	5.99181	5.76755	5.56644	5.48819	5.92888	5.473	5.94329	5.40953	5.53405	5.63186
ENSBTAT00000002936	3.16145	3.06918	3.24315	3.01712	2.74424	2.21145	2.97388	2.73129	2.94423	3.04788	3.15945	2.87201
ENSBTAT00000002938	4.30086	4.15944	4.4661	4.06063	4.84801	4.77908	4.20309	4.08298	3.93578	3.5834	3.88709	3.75599
ENSBTAT00000002944	5.52035	5.4775	5.16606	6.41623	6.92405	6.22445	6.33981	7.46463	6.07025	7.61101	7.74784	7.52794
ENSBTAT00000002946	5.78441	5.71007	5.34991	2.38799	2.16331	2.06695	4.3138	4.76875	4.93681	2.63842	3.33471	2.50241
ENSBTAT00000002948	10.2262	10.1137	10.0026	9.10618	8.98689	8.99672	10.4405	9.86604	10.384	8.01807	8.01964	8.14216
ENSBTAT00000002952	2.7064	3.32376	3.08362	3.91441	4.11041	3.87399	3.67058	3.6633	3.62272	3.79016	4.05227	3.7128
ENSBTAT00000002955	4.10559	4.25688	4.08497	4.94082	5.289	5.04708	4.15893	4.43726	4.24336	4.33226	4.72796	4.56248
ENSBTAT00000002959	4.32038	4.00867	4.23657	5.51666	5.40034	5.00679	4.62905	4.71207	4.19573	4.80512	4.94428	4.8496
ENSBTAT00000002960	0.098	0	0.321485	0	0	0.0912133	2.70474	0.0409642	1.25485	0.0695552	0	0
ENSBTAT00000002962	1.30331	1.4817	1.74479	1.67289	1.54653	1.7434	1.67609	3.04043	1.96701	3.91265	2.94531	3.68064
ENSBTAT00000002963	4.43025	4.67182	4.47897	4.77534	4.70881	4.65022	4.48781	4.60741	4.71383	4.61422	4.634	4.66467
ENSBTAT00000002964	0.452912	0.283361	0.500468	0.387607	0.331069	0.479565	0.733739	0.863848	0.935801	1.44284	0.968483	1.46458
ENSBTAT00000002967	6.71518	6.49751	6.08333	5.01722	5.29547	4.67715	5.62488	5.3409	5.18459	5.85395	5.745	5.64895
ENSBTAT00000002970	3.2648	2.0488	2.79511	0.0579663	0.281716	0.142164	5.08303	5.58672	5.34246	2.1384	1.87228	0.582306
ENSBTAT00000002971	0.345661	0.0613919	0.132479	1.45865	2.29481	1.67474	0	0.292717	0	0.0543894	0.162791	0.199038
ENSBTAT00000002972	3.82564	3.8418	3.98607	4.05878	3.77197	3.67986	5.14115	5.40896	4.93895	5.14676	5.26129	4.96398
ENSBTAT00000002973	3.50298	2.82875	3.03078	4.01601	3.19305	3.53041	3.02841	3.50143	3.37279	3.96286	3.85874	3.44792
ENSBTAT00000002975	0.406245	0.636675	0.55509	0.552192	0.691464	0.636609	0.757914	0.486857	1.01175	1.24799	1.02621	1.37584
ENSBTAT00000002976	4.4708	4.2327	4.00555	2.28866	2.44006	2.05587	5.24375	4.9867	5.53971	2.99606	3.26103	2.68346
ENSBTAT00000002978	0.286847	0.52759	0.257445	0.763742	0.85659	1.28647	0.461344	0.49721	0.429508	1.59927	1.36628	2.00241
ENSBTAT00000002979	0.114597	0.221443	0.150701	0.536603	0.0875287	0.495961	0.35745	0.562063	0.281412	0.493592	0.680417	0.588429
ENSBTAT00000002982	3.80588	3.65659	3.74775	6.46773	6.70689	6.32133	4.04879	4.10874	3.78808	4.5648	4.74469	4.61051
ENSBTAT00000002983	2.15482	1.46998	2.00089	1.91669	1.52994	2.37642	2.07752	2.3467	2.54673	2.79693	3.09704	2.68804
ENSBTAT00000002984	5.07282	5.09412	5.74191	0.361033	0.0356736	0	2.25364	1.93457	3.05238	0.794416	1.64915	0.621146
ENSBTAT00000002985	1.26296	0.867691	1.21847	2.76478	2.46269	1.30622	1.33564	1.46263	1.89257	2.08524	2.28673	2.5967
ENSBTAT00000002986	5.94211	6.09095	6.20045	3.15348	3.66945	3.48684	5.50588	5.64737	5.45814	3.10905	3.24364	3.21637
ENSBTAT00000002992	3.41755	3.70697	3.64881	2.75124	2.80252	2.80968	3.56001	2.40404	3.1025	3.56217	2.69284	2.83894
ENSBTAT00000002998	5.58517	5.32578	5.46548	2.70278	2.88261	2.82715	5.68487	6.4618	5.73992	2.60381	2.83351	2.66038
ENSBTAT00000003002	3.60019	3.65624	3.74081	4.36208	4.26759	3.65673	3.3671	3.36997	2.83664	4.1412	3.96564	4.08763
ENSBTAT00000003003	2.94572	2.28511	2.60901	1.94324	2.11119	2.09157	2.8866	2.73451	3.3226	2.59515	2.55024	2.54452
ENSBTAT00000003007	1.69326	1.40053	1.57672	1.71116	1.73888	1.86311	2.16865	2.59497	1.94183	2.00192	2.41886	2.46263
ENSBTAT00000003008	0.177357	0.27494	0.354662	0.0836133	0.0735836	0.312894	0.770629	0.512024	0.112409	0.951114	0.316558	0.921077
ENSBTAT00000003010	2.03237	2.0431	2.02161	0.86883	1.9575	1.29101	3.32747	2.94429	2.44741	2.9078	2.84501	2.49478
ENSBTAT00000003013	1.34362	1.20963	1.2429	2.40195	1.60987	2.44196	2.08953	3.77473	2.81	3.56105	3.30457	3.58862
ENSBTAT00000003015	0.130051	0.0536164	0.116055	0	0.0340327	0	0	0.108332	0.19911	0	0.601947	0.0896505
ENSBTAT00000003016	3.18433	3.03421	3.23941	2.31611	2.50996	2.77018	2.96624	2.92182	3.24209	2.52122	2.76897	2.86367
ENSBTAT00000003022	5.10929	4.9383	5.14435	5.63581	5.7117	6.01977	5.49238	5.72205	5.34789	5.68603	5.74651	5.58782
ENSBTAT00000003026	1.6777	1.95342	2.03612	1.73421	2.01724	2.23066	3.0768	3.60831	3.01129	3.74886	3.15362	3.49279
ENSBTAT00000003027	2.70556	3.108	2.80194	2.01837	2.06198	1.99577	2.75021	2.50156	2.92866	2.27239	2.58439	2.34217
ENSBTAT00000003028	2.22825	1.60949	1.80218	1.64202	1.42926	1.24814	3.09635	3.76675	2.63166	3.44326	3.00404	3.47691
ENSBTAT00000003031	0.317723	0.260303	0.285374	0.50888	0.980329	0.335072	0.212959	0.630429	0.242072	0.318836	0.841513	0.161685
ENSBTAT00000003032	4.23559	5.46101	5.93499	4.5722	4.14042	3.63131	3.1741	2.68059	3.64219	5.42099	5.48418	5.62539
ENSBTAT00000003033	2.42223	2.29516	2.19155	1.65735	1.76867	1.37054	2.5227	2.41923	2.59865	3.24855	3.52813	2.8053
ENSBTAT00000003035	4.15463	3.93025	3.93695	3.61308	3.60019	3.37815	3.50192	3.62531	4.24784	4.19696	3.87679	4.27689
ENSBTAT00000003039	0.229197	0.142294	0.205252	0.374657	0.851298	0.566478	0.0687983	0.360447	0	0.0431631	0.494024	0.0414819
ENSBTAT00000003040	1.08442	0.89801	0.638946	2.53977	2.02883	2.13616	0.687839	1.6014	1.39961	3.1863	3.00146	3.78375
ENSBTAT00000003042	1.93867	1.9509	2.36911	2.90784	2.59865	2.32542	3.49913	3.43685	3.35359	3.57034	3.40359	3.55316
ENSBTAT00000003052	0.192745	0.150448	0.415576	0.192598	3.79098e-06	5.32531e-06	0.450427	0.362515	8.183e-06	0.574494	0.139277	5.56809e-06
ENSBTAT00000003055	5.26134	2.93276	2.49372	7.24678	6.51901	6.73932	5.58551	3.41719	5.41778	6.42036	5.92438	6.3525
ENSBTAT00000003058	3.3696	3.77726	3.64391	3.52938	3.68873	3.75284	3.86007	3.50531	3.60767	2.67069	3.02862	2.77434
ENSBTAT00000003062	0.108202	0.322182	0.0965274	0	0.263793	0.948089	0	0	0.115083	0	0	0.217023
ENSBTAT00000003071	3.80223	3.87546	3.76998	4.40259	4.49647	4.11304	3.86942	3.45504	3.71181	3.46985	3.56577	3.802
ENSBTAT00000003072	5.82401	5.79234	5.84861	4.9955	4.87766	4.34551	6.5886	5.75775	6.45607	5.99206	5.60082	5.87886
ENSBTAT00000003073	5.33273	5.12139	5.01838	6.06605	5.79575	5.79779	5.48602	6.1617	5.92892	6.96294	7.31347	7.20954
ENSBTAT00000003076	1.16366	1.46697	1.21798	1.31025	1.20051	1.32027	1.44009	1.80957	1.69761	1.44214	1.74059	1.37177
ENSBTAT00000003078	3.27724	3.5143	3.33311	2.62434	2.84954	2.64548	3.30062	3.08993	3.56116	3.20733	3.44366	3.42848
ENSBTAT00000003082	0.758375	1.62448	1.15644	0.203555	0.291385	0.284265	1.43699	2.10776	2.58595	1.3557	1.07406	1.06201
ENSBTAT00000003086	3.01239	3.01451	2.9259	3.7667	3.88948	3.5638	2.25665	2.43842	2.30651	2.82763	2.71153	2.94806
ENSBTAT00000003094	3.11333	2.95163	2.62264	3.43722	3.16597	2.96677	3.59806	3.96578	3.73733	4.03944	4.68832	4.13201
ENSBTAT00000003097	3.3522	3.0835	3.00875	1.43269	1.16693	0.970593	2.76932	2.24691	2.20033	3.11725	3.27797	2.98828
ENSBTAT00000003098	0.0621854	0.234848	0.304121	0	0	0.184896	0.137517	0.240797	0	0.0441732	0.254583	0.12381
ENSBTAT00000003099	3.81719	3.71144	3.47136	3.17285	2.99105	2.71399	3.85687	3.58806	3.95401	3.30648	3.31636	3.51817
ENSBTAT00000003111	1.74617	1.67129	2.18152	1.00259	1.49721	1.39409	0.472189	0.877355	5.07678e-06	1.12912	0.61297	0.878551
ENSBTAT00000003112	2.56323	2.60643	2.64963	2.54119	2.94752	2.7414	3.10989	3.13973	2.9814	2.95408	2.77254	2.76425
ENSBTAT00000003115	0.175955	0.775791	0.197197	0.225249	0.287616	6.61649e-07	2.43287e-06	0.323883	0.904762	0.484101	0.250188	0.114684
ENSBTAT00000003118	0.0360613	0.0574463	0.0320556	0.11977	1.05329	0.988305	0	0	0	0.0501833	0	0.0242347
ENSBTAT00000003121	0	0.0380051	0	0.0135675	0.0584751	0.505471	0.246217	0.11199	0	0.112454	0.0672163	0.314355
ENSBTAT00000003129	4.23667	4.66264	4.14593	6.17069	5.8617	5.26721	4.95498	4.79404	4.79263	6.02443	5.39635	6.00349
ENSBTAT00000003130	2.47384	2.84654	2.74078	1.91749	2.10117	1.96411	4.25856	3.95004	3.66854	2.93595	2.68102	2.8241
ENSBTAT00000003131	6.76793	6.73846	6.55728	5.16407	5.31306	4.69258	7.04407	6.881	7.01988	6.0198	6.26476	5.78205
ENSBTAT00000003132	0.512678	0.968063	0.758825	0.738203	0.32865	0.40672	0.78536	0.725597	0.380404	0.430762	0.337222	0.445395
ENSBTAT00000003135	2.80557	3.23994	3.73287	4.28927	4.43807	4.70379	3.21085	3.45003	3.45573	4.22653	4.27993	3.8142
ENSBTAT00000003140	1.36562	1.4553	1.7455	1.89016	2.08769	1.94334	2.86485	2.44278	2.671	2.7124	2.32588	2.5796
ENSBTAT00000003141	2.03729	1.80369	1.7278	1.01008	1.95831	2.08769	2.14263	2.27985	2.42777	1.90095	2.27502	2.0852
ENSBTAT00000003143	0.259881	0.14909	0.272641	1.80045	1.40067	1.66679	0.319442	0.200627	0.187674	0.622841	0.653609	0.576225
ENSBTAT00000003145	5.54571	5.41715	5.4562	5.4645	5.11782	5.53624	6.02362	5.6879	5.54832	4.98783	4.85966	4.71918
ENSBTAT00000003146	0.938588	0.575581	0.934431	1.4828	1.75825	2.17436	0.268572	0.756812	0.170076	1.07294	1.34329	1.24975
ENSBTAT00000003149	3.84859	3.78734	3.84417	4.28948	4.30106	4.26916	4.40962	4.25488	4.33476	4.1133	4.4353	4.46098
ENSBTAT00000003151	4.12955	4.02641	3.92305	4.29467	4.40182	4.39516	4.41716	4.65677	4.19187	4.30797	4.57033	4.34917
ENSBTAT00000003156	3.64015	3.57421	3.83196	3.33219	2.99572	2.65363	4.09289	3.70417	3.94142	3.39164	3.30982	3.51618
ENSBTAT00000003163	2.22028	1.02396	1.50346	2.20928	1.83591	2.17718	1.52348	2.68666	1.65275	2.69456	1.84012	2.62213
ENSBTAT00000003165	4.86718	4.87264	4.69528	4.29064	4.13256	4.23451	5.02253	4.95315	4.93528	3.5079	4.06794	3.66007
ENSBTAT00000003167	7.11443	6.99754	6.80917	6.49825	6.6494	6.24876	6.65807	6.52233	6.81643	6.14433	6.25041	6.26096
ENSBTAT00000003173	0.919461	0.397728	1.23818	0.267797	0.214219	0.324344	1.54699	0.887694	0.68226	1.84266	0.647443	1.92479
ENSBTAT00000003175	0.759237	0.637851	0.434516	0.424042	0.263705	0.89654	0.536682	0.452785	0.390543	0.356308	0.367475	0.489678
ENSBTAT00000003176	1.05512	0.899733	1.20141	0.923135	1.30269	0.975795	0.698612	0.664929	0.727979	0.582531	0.427761	0.513642
ENSBTAT00000003178	0.458184	0.598601	0.754774	1.49164	1.66155	1.6291	0.536525	0.383489	0.351357	1.21817	1.20809	1.11283
ENSBTAT00000003182	0	0	0.226685	0.150827	0	0.162356	0	0.742877	0.537127	0.686901	0.233104	1.53065
ENSBTAT00000003183	0.548448	0.455524	0.453791	0.82455	0.553747	0.601482	0	1.38116	0.367453	0.637519	1.1491	0.910419
ENSBTAT00000003186	4.16409	3.89607	3.89109	3.72987	3.54189	3.17456	4.52893	4.94918	5.00409	3.93116	4.03012	4.1235
ENSBTAT00000003187	2.04167	2.19857	2.38188	2.08563	2.09279	1.72286	3.28161	3.19645	3.32387	2.98044	3.29989	2.95904
ENSBTAT00000003190	3.97347	4.13192	3.51325	5.34287	4.92521	4.44361	4.2405	3.77242	3.90379	5.00466	4.46605	4.93451
ENSBTAT00000003191	3.72717	3.57084	3.5552	2.41036	2.60376	2.4039	2.99926	2.06335	3.04596	2.38923	1.94098	1.9213
ENSBTAT00000003192	9.83855	9.59402	9.51166	0.453294	0.373987	0.984535	9.75567	10.5551	9.82015	1.16309	0.925814	1.69098
ENSBTAT00000003193	3.48661	3.86271	3.89327	2.94915	2.9087	3.04994	3.93343	3.19573	3.77956	2.87492	2.85418	2.95762
ENSBTAT00000003195	4.24044	4.62342	4.23853	3.68818	3.97006	3.89333	4.97947	3.84868	4.37557	3.24498	3.49116	3.56305
ENSBTAT00000003197	7.56065	7.60081	7.54107	6.09292	6.40742	6.11677	7.43237	6.75658	6.81356	5.57561	5.65192	5.79471
ENSBTAT00000003200	3.8675	3.8258	3.33801	2.8291	2.58011	2.3332	2.85143	2.72222	2.85104	3.78176	3.3547	3.8414
ENSBTAT00000003201	9.62547	9.17934	9.27167	7.67116	7.68105	7.186	9.43962	9.24433	9.19629	8.75545	8.16019	8.16973
ENSBTAT00000003203	2.89431	2.86356	3.23486	3.2218	2.42057	2.31387	3.00494	2.56447	2.7099	2.9144	2.7408	2.65005
ENSBTAT00000003204	4.49665	5.28448	4.83897	3.53864	5.50145	4.5584	3.36348	4.37999	4.51019	5.28198	4.30851	5.39004
ENSBTAT00000003205	1.16363	1.14818	1.65103	2.25298	2.43958	2.46755	1.81823	2.42886	1.72053	2.5549	2.41456	2.52924
ENSBTAT00000003206	5.39974	5.38914	5.44372	4.37496	4.33471	4.02017	5.05537	5.23322	5.33701	4.88357	5.02906	4.97374
ENSBTAT00000003210	1.73266	1.72815	1.98195	1.46627	1.74097	1.5668	1.59491	2.1481	2.26396	2.18411	2.30269	2.20554
ENSBTAT00000003211	0	0.148489	0.163394	0.209813	0.142342	0.172132	0.473081	0.422026	0.778174	1.2029	1.23428	1.05001
ENSBTAT00000003212	3.3523	3.22722	3.48651	2.65982	3.09156	2.76651	3.37951	3.16925	3.60534	2.8106	2.78415	2.68041
ENSBTAT00000003213	0	0.102758	0	9.38402e-08	0	0.140094	0.0865057	0.103674	0.0795721	0.314678	1.7694e-05	0.00356229
ENSBTAT00000003214	2.5794	2.49313	2.43815	2.942	3.02739	2.59884	3.06175	2.83778	2.38697	2.55225	1.96054	1.98921
ENSBTAT00000003218	1.95528	2.29215	2.7642	2.2412	2.43401	2.00872	2.88548	2.62009	3.26867	2.43587	2.69885	3.17045
ENSBTAT00000003219	4.73122	4.73657	4.55821	3.35005	3.0336	2.89377	4.41932	3.99333	4.60111	3.06672	3.36411	3.0266
ENSBTAT00000003220	3.44644	3.54533	3.17417	1.75939	2.06829	2.36682	2.36135	2.69393	2.99723	2.47905	2.33668	2.56553
ENSBTAT00000003225	3.27942	3.19302	3.08993	2.27538	2.24797	1.8271	3.2299	2.77602	3.10044	2.61481	2.37621	2.71379
ENSBTAT00000003229	5.94733	6.09002	6.02716	7.08201	6.87966	6.71539	6.37836	6.47232	6.88258	7.35668	7.96395	7.53782
ENSBTAT00000003234	0	1.14012e-05	6.75406e-05	3.98457e-05	0.676951	1.51154	6.5705e-05	8.13835e-06	0	1.32708e-05	4.34271e-05	4.85267e-05
ENSBTAT00000003236	6.28435	6.09124	5.82074	7.00587	6.81569	6.82887	5.70573	4.76139	5.40386	7.19116	6.51325	6.69988
ENSBTAT00000003239	5.37072	5.15351	5.22277	5.69602	5.64923	5.39245	5.50091	5.5057	5.73776	5.33104	5.60769	5.69694
ENSBTAT00000003242	4.99246	4.91408	5.15224	4.09799	3.94747	3.6281	4.63024	5.14115	4.95912	3.8173	4.36643	4.02086
ENSBTAT00000003245	0.622485	0.119968	0.132138	0.172763	0.226222	1.15854	0	0	0.303968	0.210956	0.114245	0.106528
ENSBTAT00000003249	1.82611	1.87124	1.77099	1.06358	0.942526	0.805587	3.01665	2.03608	2.96636	2.4011	2.60889	2.38051
ENSBTAT00000003250	5.52264	5.23494	5.34745	4.28228	4.29907	3.95672	5.97085	5.49891	6.08171	4.74868	4.69007	5.1047
ENSBTAT00000003252	4.76734	4.77913	4.82288	4.65027	5.03837	5.09588	4.41296	4.3318	4.49543	4.20906	4.26011	4.05811
ENSBTAT00000003254	2.80211	2.68862	3.11841	2.55957	2.63836	2.62326	3.38575	3.22829	3.63817	3.47371	3.55297	3.17646
ENSBTAT00000003257	1.24857	1.62039	1.31327	0.759174	0.822762	1.24333	0.65515	0	0.614291	0.19245	0.921903	0
ENSBTAT00000003259	9.58016	9.78856	9.71547	8.46541	8.69733	8.3672	9.97087	8.8309	9.1712	8.20781	8.00618	8.43758
ENSBTAT00000003261	5.07041	5.05752	5.0509	4.60025	4.90445	5.1115	5.157	5.34353	5.15465	5.05812	5.24609	5.25981
ENSBTAT00000003262	2.57636	1.78125	2.0372	3.7306	3.17364	3.07472	2.97398	2.95516	2.22002	3.16701	3.17825	3.8372
ENSBTAT00000003267	0.549787	0.803069	0	0	0.143524	0.0455565	0	0	0	0.149995	0	0.471472
ENSBTAT00000003269	2.82639	2.49274	2.8938	2.2086	2.20366	1.35657	3.07655	3.72775	3.85557	3.04214	3.51171	3.28195
ENSBTAT00000003272	0.275508	0.116985	0	0.165123	0	0.218812	0.0840633	0.232214	0.0775222	0.10379	0.471366	0.281366
ENSBTAT00000003273	2.67312	2.71036	1.94141	1.80376	1.51927	0.899674	2.3758	2.4349	2.57114	2.42575	1.82553	2.17671
ENSBTAT00000003274	4.70098	4.54983	4.60262	3.79594	4.04785	3.71477	4.99306	4.91197	4.92758	3.74142	3.64962	3.66386
ENSBTAT00000003276	3.25631	3.338	3.64318	2.53404	2.66602	2.76341	5.57199	5.14421	5.5879	5.53318	5.50956	5.33088
ENSBTAT00000003277	3.59983	3.39728	3.36115	3.41916	3.2995	3.18851	3.91194	4.90368	4.03603	4.30232	4.8466	4.45947
ENSBTAT00000003278	2.15539	2.03294	1.55311	0.788664	1.00733	1.05844	1.98515	2.59021	2.05525	1.69215	1.57303	2.27129
ENSBTAT00000003283	4.70728	4.32382	4.14646	4.50071	4.4491	4.6468	3.96882	4.65591	4.6467	4.05644	4.81978	4.115
ENSBTAT00000003285	3.43396	3.24523	3.46681	2.80664	2.89419	2.69452	3.68535	3.38214	3.39014	2.964	3.11088	3.22793
ENSBTAT00000003291	4.91999	4.3809	4.42073	2.9528	2.75832	2.62752	4.80358	4.68852	4.6695	3.04935	3.47994	3.00728
ENSBTAT00000003297	3.37504	3.29979	3.19873	3.7036	3.91625	4.02955	3.00016	3.5083	3.55171	4.37052	4.52298	4.47766
ENSBTAT00000003304	5.61748	5.66412	5.65644	4.1645	3.57339	4.61092	1.58901	0.836	0.561664	0.387423	1.24287	0.714036
ENSBTAT00000003305	6.25534	5.88974	6.16703	7.37452	7.43315	7.43395	6.77833	6.90404	6.27436	7.27525	7.49008	7.14516
ENSBTAT00000003306	0.825974	1.21013	1.93561	1.88373	2.02839	1.86951	1.66404	1.48615	1.24926	1.74157	1.41213	1.71515
ENSBTAT00000003307	3.28308	3.57877	2.89553	3.45582	3.42859	3.86528	4.3779	3.6939	4.16797	3.66126	3.82714	3.75831
ENSBTAT00000003312	4.96804	4.87101	4.82599	4.84792	4.81738	4.85177	4.99367	4.72825	5.18259	3.8684	4.30405	4.41031
ENSBTAT00000003315	0	0	0	0	0.321573	0.376803	0	0	0	0.299599	0	3.44279
ENSBTAT00000003317	0.530744	0.644747	0.369163	0.711091	0.744872	0.639441	0.856639	1.15783	0.830704	1.47343	1.80593	1.82266
ENSBTAT00000003318	2.87445	2.64607	2.29278	2.22607	2.3085	2.02403	2.3167	3.14002	3.34672	2.92532	3.57012	3.14835
ENSBTAT00000003319	5.45739	5.76466	5.71307	4.32478	5.02898	4.473	4.129	4.62056	4.4334	4.30128	4.24907	4.38601
ENSBTAT00000003320	2.76926	2.69195	2.83739	2.66832	2.9694	3.15132	4.36781	3.66772	4.15621	3.66369	3.51331	3.98446
ENSBTAT00000003325	3.46878	3.589	3.40551	2.61081	2.6243	2.8227	3.68316	3.6777	3.92608	2.60755	2.97418	3.15519
ENSBTAT00000003326	0.844053	1.39886	1.1152	2.18273	2.3053	2.35271	0.924522	1.35473	0.896073	1.85711	1.83118	1.9327
ENSBTAT00000003327	2.81084	3.18803	2.76711	1.84448	1.24784	1.34345	2.57834	1.86032	2.23691	1.4065	1.14971	0.906947
ENSBTAT00000003330	8.12952	8.07231	7.7111	0.304408	0	0.139247	8.68789	9.769	8.80884	0.49142	0.445989	0.224447
ENSBTAT00000003331	5.28567	5.16702	5.06508	4.81758	5.01729	4.622	4.91112	5.39057	5.24846	4.59544	4.95076	5.23579
ENSBTAT00000003332	2.28781	1.91365	1.87812	3.33655	2.7892	2.83113	2.75958	3.0636	2.84719	3.29392	3.35467	3.36738
ENSBTAT00000003333	4.22733	4.43579	4.18263	4.83908	4.63415	4.76361	4.01083	3.97497	3.79913	3.9853	4.00652	4.20123
ENSBTAT00000003336	0.542242	0.166188	0.53623	0.121112	0.206946	0.360528	0.299869	0	0.887639	0.896642	0.673569	1.78755
ENSBTAT00000003338	4.63839	4.51005	4.34891	4.96016	4.89393	5.24664	3.55448	4.024	3.98571	4.09897	4.52914	4.15453
ENSBTAT00000003340	4.35174	4.22274	4.09332	3.8115	3.70309	3.28593	4.34273	4.86185	4.48387	3.91288	4.03041	4.28142
ENSBTAT00000003341	0.145748	0.353039	0.385916	0.165103	0.180046	0.239332	0.442197	0.357718	0	0.354927	0.229709	0.0254576
ENSBTAT00000003343	4.26553	4.41026	4.26883	4.00779	3.59599	3.4987	4.61558	4.60261	5.10402	5.03073	5.43514	5.43894
ENSBTAT00000003345	1.06203	0.905772	0.975483	4.86026	4.6097	4.09081	1.26025	1.49612	1.80835	4.24989	4.37882	3.73125
ENSBTAT00000003346	0.437145	0.06676	0.335659	0.308675	0.0842194	0.452152	0	0.069268	0	0.171044	0	0.0571778
ENSBTAT00000003353	2.9019	2.92447	3.21647	1.41764	1.06842	0.720125	2.64996	2.97123	3.23773	1.762	2.26485	1.8913
ENSBTAT00000003354	3.04047	2.79751	2.73537	2.32083	2.0472	2.25322	3.02	2.70175	3.04554	2.10467	2.34618	2.67697
ENSBTAT00000003355	3.14004	2.71743	2.8069	3.15538	3.1324	2.94842	3.00479	3.13471	3.16632	4.04687	3.93303	4.10517
ENSBTAT00000003358	0.102772	0.824075	0.608275	0.144965	0.0526207	0.269988	0.115702	0.0430545	0	0	0	0
ENSBTAT00000003359	2.82063	3.7948	3.43513	3.26375	3.60433	3.54072	4.02596	3.74509	3.99707	3.88085	3.83143	3.34932
ENSBTAT00000003362	0.938849	0.316647	0.46476	0.741313	0.470014	0.626842	0.275189	1.78686	0.403247	2.6277	1.70427	2.69984
ENSBTAT00000003365	1.1979	1.39624	1.5216	1.67897	2.19856	1.94101	1.97345	2.03374	1.7249	2.0877	2.19334	2.21488
ENSBTAT00000003367	1.28918	0.771443	0.86829	1.2764	1.73771	1.42797	1.8194	1.77743	1.48134	1.07849	1.00373	1.31593
ENSBTAT00000003370	3.8125	3.36894	3.76537	3.09422	2.39261	2.43767	4.14284	3.05558	4.21571	2.98298	2.96532	2.45582
ENSBTAT00000003373	3.75733	3.98569	3.99731	4.51626	4.53045	4.66242	3.67041	3.45207	3.25079	3.86076	3.58056	3.63457
ENSBTAT00000003377	6.35428	6.467	6.36911	6.29253	6.34227	6.05204	6.22534	6.47797	6.56979	5.28116	5.31874	4.92094
ENSBTAT00000003379	2.2103	1.99356	2.15513	1.99517	2.48898	2.17001	1.87932	1.75647	2.00381	2.01932	1.91694	1.98669
ENSBTAT00000003380	0.199637	0.187692	0.457603	0.242743	0.289772	0.297339	0.353788	0.190095	0	0.728606	0.341873	0.689095
ENSBTAT00000003382	2.17303	2.1996	1.90667	3.46183	3.07107	2.95277	2.55299	2.9922	2.97794	3.13469	3.60385	3.554
ENSBTAT00000003384	3.71553	3.12272	3.58472	5.83702	4.40987	4.7155	2.88079	2.62877	3.16314	3.34958	3.49358	3.18947
ENSBTAT00000003394	1.31905	0.419578	0.871628	3.75952	3.0497	3.70903	1.5421	2.65291	1.30186	3.27579	2.68585	3.33771
ENSBTAT00000003395	0.0327796	0	0.113162	0.177431	0.337794	0.359933	0.207618	0.0528888	0	0.292435	0.0469609	0.186758
ENSBTAT00000003400	2.8862	2.57377	2.41411	1.76781	1.47454	1.51332	2.16124	2.46912	2.37458	2.52243	2.87729	2.51826
ENSBTAT00000003401	4.2442	4.15879	4.10641	4.24477	4.20882	4.04505	3.60637	3.95527	3.50576	3.74339	3.551	3.758
ENSBTAT00000003402	5.76294	5.58447	5.48519	5.84016	5.85937	5.64049	5.30445	5.24363	5.34695	4.80928	4.8733	4.98049
ENSBTAT00000003403	6.08783	5.8203	5.96096	4.53886	4.56324	4.45714	6.45107	5.77464	6.58661	5.73308	5.49734	5.35356
ENSBTAT00000003407	4.19739	4.24826	4.06144	1.43021	1.47691	1.32167	3.10187	3.09321	3.28971	2.75482	2.68386	2.89503
ENSBTAT00000003411	4.25631	4.45276	4.52303	3.51735	3.65101	3.52548	4.51465	4.53938	4.73216	4.75562	4.64416	4.49783
ENSBTAT00000003413	0.217597	0	0.0512144	0.575482	0.219294	0.324701	0.186962	0.487326	0.74703	1.12161	0.644687	0.868714
ENSBTAT00000003414	0	0	0.342978	0.240082	0	0	0	0	1.5961	0	0.16204	0.28842
ENSBTAT00000003415	3.77456	3.77643	3.68624	5.16225	4.6089	4.42582	4.27468	5.17551	5.04672	5.52686	5.94784	5.80192
ENSBTAT00000003419	4.30233	3.97342	4.20076	3.70713	3.80582	3.37968	4.83696	4.5703	4.60721	4.309	4.09435	4.35471
ENSBTAT00000003420	2.27557	2.54953	2.25779	1.55559	1.65296	1.97182	1.48949	1.45908	1.36871	1.46821	1.48448	1.53645
ENSBTAT00000003421	3.89263	3.36567	3.42573	0.898588	0.598639	0.951826	3.71263	3.45508	3.7816	1.58479	1.72027	0.92639
ENSBTAT00000003422	3.35248	3.49486	3.30616	2.50753	2.64565	2.47541	3.32023	3.35395	3.60354	3.46383	3.77945	3.47162
ENSBTAT00000003425	0.892698	0.478673	0.407541	1.06254	0.175656	0.894014	1.52905	1.43941	0.181735	2.55052	1.43293	1.63621
ENSBTAT00000003426	0	0	0	0	0.298044	0.106975	0.988863	0	0.472918	0.23258	0	0.223998
ENSBTAT00000003427	3.45521	3.5171	3.24623	3.1963	3.11702	2.74488	3.50618	3.67024	3.32781	3.24614	3.5705	3.1787
ENSBTAT00000003429	4.13889	4.19182	4.01168	5.19462	4.86729	4.8655	4.30736	4.41787	4.22678	4.74867	4.79539	4.8032
ENSBTAT00000003431	9.28979	9.10734	9.17616	8.95132	9.12493	9.14079	9.63987	9.85644	9.65911	9.65055	9.40225	9.41524
ENSBTAT00000003433	3.72422	3.79117	3.65767	4.1735	3.8639	3.77864	3.91058	4.36594	4.44221	3.94598	4.56863	4.06574
ENSBTAT00000003434	0.725838	0.433976	0.828918	0.489205	0.45077	0.655045	5.47373	3.86586	6.03383	2.55951	2.64187	2.01214
ENSBTAT00000003435	0.305144	0.72339	0.455979	1.46512	1.76334	1.51476	1.12241	0.352795	1.03829	3.03151	1.70737	1.39504
ENSBTAT00000003437	5.81549	5.82813	6.09143	3.66612	3.89118	3.83798	4.64478	4.37707	4.79508	3.31694	3.11418	3.17833
ENSBTAT00000003439	0.674901	0.969225	1.00815	1.19035	1.0719	0.856619	2.87068	1.81689	2.74336	2.94393	2.2715	2.7609
ENSBTAT00000003441	3.69801	3.89629	3.55281	4.08896	4.29009	4.18828	3.75773	4.01258	4.52127	4.09921	4.62227	4.32419
ENSBTAT00000003442	3.7396	3.74318	4.11732	3.28797	3.04216	2.54261	3.87555	3.46733	4.25748	3.23315	3.29311	3.35568
ENSBTAT00000003444	1.19329	0.901287	1.06833	1.2411	1.15529	1.2299	1.08045	1.34285	1.0932	0.663133	0.902191	1.34702
ENSBTAT00000003445	0	0.0809743	0	0.058213	0.283348	0.123107	0	0.305598	0.10395	0.105479	0.210033	0.284822
ENSBTAT00000003457	0.502	0.738626	0.798732	0.523184	0.55895	0.607548	1.40118	2.15775	1.42858	2.75601	1.20896	2.16453
ENSBTAT00000003460	5.31655	2.89442	3.7555	6.36254	4.63138	4.79246	3.11044	3.81818	3.6335	3.88176	3.78802	4.51789
ENSBTAT00000003463	1.01536	1.24936	1.01132	0.276081	0.318717	0.266296	0.637514	0.981847	1.18708	1.3854	1.02996	0.634948
ENSBTAT00000003467	4.36529	4.00417	4.49946	4.28573	4.2971	4.38237	4.72781	4.50908	4.60859	4.78205	5.14977	5.05448
ENSBTAT00000003468	2.67911	3.43236	3.67173	2.4479	2.55527	2.26323	3.19705	2.969	3.62457	2.8217	3.01332	2.57418
ENSBTAT00000003470	0.110438	0.200336	0.190607	0.312623	0.0562905	0.113491	0.308701	0.931406	0.728781	0.816166	0.996423	0.547795
ENSBTAT00000003472	2.83509	2.55454	2.41276	3.04252	3.54049	3.23053	2.97854	4.28465	2.80115	4.01397	4.67753	4.32766
ENSBTAT00000003476	1.99971	2.09318	2.40903	1.85433	1.74484	2.20958	2.24879	2.60029	2.55025	2.60757	2.821	2.45344
ENSBTAT00000003479	1.43513	1.55283	1.81896	1.59034	1.90619	1.92327	1.86891	1.76356	2.15851	2.37445	2.7889	2.04478
ENSBTAT00000003483	4.45723e-07	5.39693e-07	1.27581e-06	8.48951e-05	3.0631	1.3174	0.89055	1.8286	2.03492	1.43661	2.9836	2.83948
ENSBTAT00000003484	5.09503	5.37797	5.3561	5.09424	4.94588	4.89078	5.4074	5.27897	5.49451	4.2413	4.53193	4.54392
ENSBTAT00000003485	0.393057	0.731048	0.502933	1.68765	1.65513	1.3384	0.122541	0	0.0576097	0.499245	0.19214	0.0743834
ENSBTAT00000003489	2.84184	2.92106	2.52163	1.08049	1.03612	0.853227	2.66915	1.988	1.01882	1.44256	0.63023	1.23277
ENSBTAT00000003492	3.09628	3.34382	3.20091	5.60748	5.00985	4.96521	3.59875	3.90286	3.66453	4.69019	4.7649	4.87821
ENSBTAT00000003493	4.04884	4.08074	4.01521	3.28352	3.43919	3.05609	4.03946	3.50628	3.84158	3.24813	3.18716	3.34074
ENSBTAT00000003497	0.408644	0.479359	0.583287	2.2499	1.75788	1.10682	0.558437	0.0800014	0.19489	0.113289	0.0240941	0.129342
ENSBTAT00000003498	1.82993	1.26466	1.61771	2.13235	2.2019	1.98495	2.82023	3.04092	1.78084	2.73657	3.856	2.98198
ENSBTAT00000003500	0.386639	0	0	0	0.320262	0	0.245434	0.498805	0	0.156891	0	0
ENSBTAT00000003502	2.01497	2.14628	1.8361	1.53777	1.44823	1.34249	3.03809	3.10262	3.10832	2.12452	2.00846	2.33442
ENSBTAT00000003503	2.29337	1.95122	1.83865	1.80777	3.0471	2.5223	1.63305	1.73126	1.61564	1.34958	1.39061	1.02293
ENSBTAT00000003504	0.0459846	0.24117	0	0.844835	0.958018	0.0841877	0.101755	0	0.181756	1.47132	0.0661613	0
ENSBTAT00000003506	4.28145	4.26867	4.19593	4.05404	3.928	4.11771	4.39952	4.26903	4.61388	2.9291	3.57126	3.19526
ENSBTAT00000003509	3.98888	4.05282	4.12951	3.84154	3.76584	3.7756	4.23423	4.13802	4.39248	4.33592	4.237	4.07137
ENSBTAT00000003513	1.76356	1.39349e-05	0.650986	2.00745	0.850107	1.32998	2.23117	2.26691	1.80236	2.64789	1.93976	1.30293
ENSBTAT00000003514	6.53178	6.46457	6.27231	5.27425	5.74338	5.70738	6.04329	6.05006	6.27814	5.23231	5.52889	5.84387
ENSBTAT00000003515	0.172978	0.363135	0.560635	5.87879	5.52124	5.91698	1.69315	1.87763	2.18568	5.81597	5.84153	6.23588
ENSBTAT00000003517	0.0348359	0.0555072	0	0.338672	0.397731	0.461404	0.0390766	0.0283939	0.26502	0.0484651	0	0
ENSBTAT00000003519	3.44351	3.42734	2.76982	4.05731	3.92616	3.77186	3.60002	3.8678	3.35761	3.69682	3.61717	4.1392
ENSBTAT00000003521	3.86247	4.12683	3.92087	3.66416	3.76924	3.67313	2.638	3.25948	2.7637	2.9107	3.25556	2.83071
ENSBTAT00000003522	2.84384	3.10738	2.91884	2.35031	2.67243	2.73555	3.432	3.40167	3.41041	2.86005	3.09278	2.95881
ENSBTAT00000003524	3.05382	3.32906	3.03144	3.61264	3.72812	3.7095	3.59463	3.50423	3.39532	3.30662	3.58753	3.38844
ENSBTAT00000003525	5.09613	4.69431	4.53448	3.57641	3.75716	3.95871	4.85374	4.24076	4.7235	3.22291	3.60594	2.94862
ENSBTAT00000003529	0.00103388	0.000812113	0.000892912	0.0006052	0.000514845	0.000594209	0.00117802	0.00079391	0	0	0.000679215	0.000657501
ENSBTAT00000003530	0.240112	0.486245	0.976783	0.363881	1.08794	1.39901	0.269914	0.103657	0	0	0.0921649	0.127104
ENSBTAT00000003532	3.60718	3.60019	3.59727	3.93049	3.81016	3.45387	3.4948	3.47496	3.30163	3.11818	3.03314	3.20779
ENSBTAT00000003533	3.66214	3.6757	3.4977	3.95564	3.94594	3.91489	3.68492	3.70573	3.5484	3.9337	3.86908	3.92599
ENSBTAT00000003535	2.62507	2.88537	2.90179	2.57538	2.72417	2.68114	3.56058	3.35247	3.19213	2.84955	3.04315	2.77697
ENSBTAT00000003537	3.64631	3.8221	3.96588	2.6432	2.45042	2.50262	3.46637	2.96949	3.6236	2.8218	2.67327	2.3818
ENSBTAT00000003541	3.03982	2.87265	2.98158	3.12286	3.20828	2.97127	4.23465	3.83699	3.87611	3.05929	3.43547	3.06884
ENSBTAT00000003543	0.0625136	0	0.305599	0	0	0	1.41104	1.7231	2.52655	0	0	0
ENSBTAT00000003544	2.68754	2.46769	2.6296	2.20256	2.23767	1.78277	3.5566	3.65062	3.73286	3.61837	3.96732	4.21118
ENSBTAT00000003545	6.70328	6.45235	6.41897	5.59633	5.58724	5.18018	6.6594	6.83255	7.01625	5.96096	6.21683	6.07126
ENSBTAT00000003547	0.326521	0.267719	0.239328	0.196937	0.33069	0.0448979	0	0.463547	0.340546	0.147885	0.246516	0.0965667
ENSBTAT00000003549	1.70816	1.8732	2.03244	2.1063	2.32984	2.26294	2.47377	2.90914	2.69383	2.42786	2.58683	2.63204
ENSBTAT00000003550	1.5632	2.21326	2.35116	1.09303	1.81073	1.59137	2.51227	3.28228	2.6905	2.88626	2.91735	2.3325
ENSBTAT00000003552	3.20193e-08	3.80426e-08	5.20703e-08	1.0005e-06	8.50573e-05	0.132201	3.31351e-06	2.77543e-06	2.44948e-06	0.000144643	0.473506	1.02012
ENSBTAT00000003553	1.85318	1.63114	1.85213	1.67791	1.47016	1.8402	2.83865	3.14197	2.75631	1.86334	2.34943	2.41765
ENSBTAT00000003556	3.31869	3.23185	3.29535	3.46935	3.52905	3.54142	3.28282	3.28952	3.03795	3.30951	3.20925	3.40036
ENSBTAT00000003557	2.98221	2.96974	3.17564	2.49117	2.69029	2.84904	3.17171	2.93206	3.02972	2.88078	2.70457	3.04476
ENSBTAT00000003558	0.835654	0.394851	1.32302	0.0199891	0.197865	0	1.84379	2.89175	1.96662	0.368873	0.786157	0.177851
ENSBTAT00000003559	5.04901	5.11134	5.04705	5.72921	5.57699	5.80869	5.28242	5.31899	5.54029	5.20529	5.70656	5.791
ENSBTAT00000003560	3.2518	3.15733	3.2403	4.39794	4.04171	4.3076	3.8388	3.66355	3.91949	4.48711	4.06809	4.37631
ENSBTAT00000003561	2.64102	2.93095	2.63584	2.98028	3.28255	3.06693	3.05358	3.22412	3.34519	3.48113	3.40087	3.35142
ENSBTAT00000003563	2.61387	2.79063	2.73156	2.41176	2.31138	2.20684	3.74586	3.7709	4.3543	3.32839	3.309	3.08433
ENSBTAT00000003564	0.306568	0.466094	0.276082	0.796295	0.181863	1.17418	0.378726	0.295235	0	0.24528	0.262158	0.639495
ENSBTAT00000003566	3.24449	3.24063	3.00425	3.49202	3.42931	3.55821	3.48837	3.68439	3.25765	2.6879	3.11294	2.88033
ENSBTAT00000003567	0.280543	0.229446	0.172649	0	0	0	0.22022	1.6906	0.105652	0	0	0
ENSBTAT00000003572	4.5291	4.42975	4.26354	4.87899	4.66449	4.92141	3.76946	4.10754	3.83906	3.8739	4.17338	4.09067
ENSBTAT00000003573	0.138997	0.16574	0.344076	0.282357	0.515668	0.856969	0.483205	0.538694	0.421354	0.858596	0.196404	0.774621
ENSBTAT00000003575	3.62476	3.24142	3.176	3.96952	4.2601	4.44427	4.26055	4.46285	4.53121	5.51852	6.05683	5.1986
ENSBTAT00000003576	0	0.0311316	0	0.504505	0.913787	0.362092	0	0	0	0.0271889	0	0.0767622
ENSBTAT00000003584	3.10985	3.24767	3.1468	2.66774	2.48102	2.09989	2.9987	3.14048	3.19715	3.01693	2.86167	2.89021
ENSBTAT00000003585	2.60921	2.50077	2.36038	1.54582	1.86371	0.99743	1.38401	1.875	1.18929	1.88083	1.21527	1.6549
ENSBTAT00000003589	3.04455	2.92129	2.88222	5.14242	4.91858	4.63492	3.38785	3.77164	3.02664	5.33321	4.44308	5.2764
ENSBTAT00000003590	0	0.127251	0	0	0.027553	0.0668963	0	0	0.0563512	0.147714	0.115786	0.208124
ENSBTAT00000003591	0.179361	0.566652	0.355701	0.57066	1.41773e-06	0.211645	1.43951e-06	0.656057	0.877376	1.01232	6.99809e-06	0.607518
ENSBTAT00000003595	1.68362	1.67217	1.65707	2.38507	2.02979	2.10946	4.7066	4.80319	5.34059	5.03646	5.96877	5.64937
ENSBTAT00000003598	2.67477	1.86111	1.77695	1.62786	1.66521	1.99641	0.857897	0.411423	0.873589	0.742242	0.369366	0.406417
ENSBTAT00000003599	3.69476	3.37432	3.44769	2.55838	2.59494	2.89885	4.10123	4.14406	4.71662	3.54941	3.94237	3.69134
ENSBTAT00000003600	2.45141	2.38258	2.31605	2.68053	2.75229	2.23886	2.6335	2.69432	2.7564	2.96943	3.0371	3.05764
ENSBTAT00000003602	4.55398	4.57247	4.60145	4.69781	4.74497	4.76487	4.6565	5.13232	4.91684	4.59177	5.02519	4.68517
ENSBTAT00000003605	0.650772	1.24679	1.12524	1.23655	1.81705	2.25095	2.09413	2.16881	1.71146	2.00902	1.96568	1.81783
ENSBTAT00000003608	3.75711	3.64657	3.7886	2.98654	3.02322	2.83668	3.86173	3.82538	4.06655	3.5429	3.8274	3.77258
ENSBTAT00000003609	6.15251	6.15921	5.9975	5.61165	5.51091	5.47705	6.35033	6.0263	6.38856	4.99871	4.88669	5.16613
ENSBTAT00000003613	0.940224	1.40088	1.18293	1.05703	1.18937	1.35133	0.968824	2.60837	1.14789	2.36695	1.73524	2.13526
ENSBTAT00000003616	4.67842	4.66543	4.67198	4.78569	4.55845	4.2351	4.91701	4.88639	4.99443	4.84447	4.67357	4.92878
ENSBTAT00000003617	2.58395	2.31409	2.73087	2.68305	2.41221	2.70325	2.5171	3.07176	2.91484	2.81546	3.33427	2.97303
ENSBTAT00000003618	1.36791	1.41457	1.97802	0.0797967	0.60951	0.352267	2.07257	0.218634	1.32225	1.2832	0.591643	0.523264
ENSBTAT00000003619	1.03754	1.47981	1.75015	0.927603	1.252	0.92568	1.93633	2.12587	2.31487	2.32675	2.67318	2.33826
ENSBTAT00000003625	0.129656	0.338224	0.322509	0.216861	0.414773	0.464525	1.76801	2.30015	1.59259	2.04421	2.12816	1.91828
ENSBTAT00000003635	3.10031	3.0061	3.20518	1.63137	1.78048	1.71712	2.80842	3.04565	3.14224	2.62485	2.71168	2.50831
ENSBTAT00000003636	6.1838	6.2698	6.25501	5.92745	5.74297	5.47455	6.33907	5.8684	5.83473	5.43119	5.26273	5.51539
ENSBTAT00000003637	1.10638	1.2839	1.65562	0.82026	0.793986	0.978849	1.12886	1.4227	1.67124	1.4658	1.15862	1.51369
ENSBTAT00000003640	6.27434	6.40362	5.85432	3.87319	3.80143	2.74407	5.89285	5.36313	5.0596	4.06309	3.66177	4.09315
ENSBTAT00000003645	0.0596801	0.440836	0.989841	0.713191	0.957032	0.620214	1.46633	1.36501	1.59521	1.69153	1.42497	1.03019
ENSBTAT00000003651	5.74057	5.67286	5.37149	5.10597	5.24773	4.94416	6.07169	7.30175	6.71474	5.14647	5.0752	5.4924
ENSBTAT00000003652	0.0670341	0	0	0.0389317	0.282946	0.406217	0.148213	0.1609	0.0700524	0.0477245	0.430989	0.36849
ENSBTAT00000003653	3.71279	3.45202	3.71122	4.91905	4.85022	4.9245	4.85972	5.10094	4.66065	6.39218	6.55648	6.21574
ENSBTAT00000003655	0.167596	0.716269	0.523721	0	0	0.0544559	0.0984117	0	0.333418	0.178376	0.0642295	0.225487
ENSBTAT00000003659	0.15884	0.302725	0.311559	0.136554	0.219417	0.376987	0.283723	0.478169	0.163074	0.721709	0.18815	0.601393
ENSBTAT00000003660	2.32008	2.67596	1.85665	6.85196	6.97723	6.22693	2.74275	2.49292	2.34563	4.41454	4.1822	4.32093
ENSBTAT00000003661	5.06281	4.8365	4.87112	4.38509	4.38446	4.11829	4.97211	4.56003	5.03503	4.56593	4.67918	4.63712
ENSBTAT00000003662	6.08666	6.13757	5.93959	6.59286	6.50992	6.41234	6.16815	5.93762	5.94746	5.29639	5.54687	5.29714
ENSBTAT00000003664	4.50187	4.49972	4.44257	4.27171	3.67575	3.85359	4.9444	5.01603	4.86311	4.44349	4.62365	4.30555
ENSBTAT00000003665	2.47032	2.61886	2.42564	2.71247	3.08797	2.54703	3.22048	2.94149	3.24844	3.02401	2.99374	3.08347
ENSBTAT00000003668	4.52524	4.41368	4.39127	3.61287	3.51273	3.43211	4.80832	5.46834	4.61026	4.26667	4.81593	4.5674
ENSBTAT00000003674	3.34292	3.21063	3.0736	2.71691	2.45802	2.68449	3.13408	3.43653	3.46099	2.45851	2.88883	2.95082
ENSBTAT00000003678	3.01361	3.04627	2.7668	3.0451	2.81863	2.01433	3.05311	3.18616	2.9756	2.71423	3.07112	2.83023
ENSBTAT00000003681	0.368578	0.510659	0.460314	0.346665	1.08739	0.937084	1.36582	0.828502	1.13902	0.799543	0.754779	0.758098
ENSBTAT00000003683	0.919718	0.325017	1.58648	0.0846838	0.340598	0.808336	3.4582	2.48755	2.79236	2.86487	2.85631	3.20831
ENSBTAT00000003689	1.16217	1.1457	1.02974	0.458733	0.373786	0.307242	1.34842	1.34861	1.39682	1.35353	1.92571	0.908188
ENSBTAT00000003690	3.77177	3.35155	3.53027	2.44676	2.32921	1.56562	3.63093	2.8615	3.61193	3.21556	3.0286	2.91984
ENSBTAT00000003691	1.18498	0.595634	0.992386	0.241894	0.401535	0.229871	1.28842	1.28686	1.91696	0.94496	0.605628	1.17935
ENSBTAT00000003693	2.57568	2.5373	2.34586	1.80794	1.64916	1.42897	2.73074	2.62368	2.86424	2.65068	2.54549	2.44495
ENSBTAT00000003694	0.00203179	0.13366	0.0997361	0.379139	0.1919	0.981943	0.970388	1.2387	0.704768	0.295454	0	0.378481
ENSBTAT00000003696	0.0303792	0.0953208	0.154886	0.0173664	0.0452114	0.0556639	0.162635	0.229802	0.0918234	0.142675	0.0647507	0.136742
ENSBTAT00000003701	2.71984	3.02425	2.98602	3.50164	3.43534	3.48607	3.44354	3.93021	3.81802	4.04313	4.0252	4.07268
ENSBTAT00000003706	4.17699	3.77706	3.20055	2.96279	2.81561	2.73253	0.621078	0.430806	1.49317	0.673165	0.759585	0.402537
ENSBTAT00000003716	5.8659	5.8659	5.87767	7.64324	7.79555	7.81426	6.41826	6.01554	6.33021	7.21526	6.7433	7.26597
ENSBTAT00000003719	3.0828	3.00208	2.98213	3.4395	3.86938	4.17969	3.97129	2.86788	3.21135	3.56949	3.24715	3.4722
ENSBTAT00000003722	4.62202	4.11692	3.34743	5.74035	4.09972	4.55178	3.73177	4.3842	4.01137	4.50769	4.88951	4.49203
ENSBTAT00000003725	5.88332	5.92347	5.90281	5.53035	5.6921	5.34842	5.67623	5.52966	5.82232	5.20393	5.33231	5.54923
ENSBTAT00000003726	3.58041	3.73979	3.62474	4.58419	4.67417	4.86523	3.81627	4.41153	3.82368	4.15291	4.44214	4.14356
ENSBTAT00000003728	3.80258	3.77246	3.73524	3.91803	3.81457	3.75564	3.99566	4.55054	4.35726	4.89165	5.09351	4.87791
ENSBTAT00000003732	1.2242	1.03759	1.38818	1.00757	0.705809	0.80675	2.54364	2.31355	2.11515	2.35307	2.17585	2.21407
ENSBTAT00000003736	2.43858	2.65608	2.66861	2.67673	2.81656	2.53411	2.34824	2.82456	2.90553	2.83925	3.04551	3.02951
ENSBTAT00000003739	3.56213	3.27599	3.45581	3.35078	3.28625	2.70073	3.48378	3.32253	3.28845	2.61513	3.15458	3.11919
ENSBTAT00000003743	5.27017	4.97635	4.88194	5.29314	5.80764	5.78588	4.46927	4.76654	5.01095	4.43656	4.87209	4.6085
ENSBTAT00000003750	0.0560989	0.499515	0.508394	1.47146	1.70388	1.67255	0.579172	0.509745	0.11444	0.715735	0.965436	0.593885
ENSBTAT00000003751	0.554829	0.169642	0.183094	1.08896	0.804766	0.767993	0.890518	2.04601	1.11877	3.05326	1.03498	2.98583
ENSBTAT00000003752	0.000601444	0.000281975	0.000740469	0.761884	0.000492766	0.538639	0.00111154	3.09214	0.00105721	1.02609	0.000681114	2.40511
ENSBTAT00000003755	0.401502	0.58666	0.748524	2.30632	1.71899	2.75516	1.56515	3.07868	1.07065	4.40372	1.94733	4.09498
ENSBTAT00000003758	4.09078	4.20811	4.21177	3.82764	3.7787	3.57578	3.50085	4.24179	3.91995	3.35323	3.57329	3.68881
ENSBTAT00000003763	0	0.421085	0.953989	0	0.866172	0	1.03617	1.36737	0.575384	1.20093	0.760648	0.216387
ENSBTAT00000003764	6.31089	6.18989	6.1662	5.46496	5.17102	4.7246	6.10832	6.19994	6.47189	4.82079	5.37474	5.53105
ENSBTAT00000003766	7.53898	7.39343	7.53653	0	0.0348853	0	6.66384	5.85152	7.0494	0.141084	0.0500558	0.198463
ENSBTAT00000003767	0.514707	0.637695	0.554315	0.4216	1.03068	0.670498	1.27156	1.6959	1.47405	2.5739	2.58391	2.69629
ENSBTAT00000003768	3.18284	2.93497	2.80961	3.26908	2.99828	2.55817	0.747799	1.03278	0.761376	0.84574	1.21096	0.492839
ENSBTAT00000003770	5.00228	5.33783	5.00392	5.83458	5.59806	5.4771	5.71119	6.06901	5.7603	5.06085	5.53524	5.42134
ENSBTAT00000003771	2.662	2.9905	2.68275	1.53016	1.67249	0.70522	2.68846	2.82173	2.62889	2.58279	2.42929	2.28143
ENSBTAT00000003775	1.44382	1.86393	1.95193	2.52198	2.58282	2.57469	2.97605	2.95915	3.21878	2.62737	2.62571	2.70398
ENSBTAT00000003777	0.517354	0.58165	0.501954	0.38866	0.5061	0.0165614	0	0	0	0.0372272	0	0.0179135
ENSBTAT00000003779	2.93864	2.96039	4.24548	5.65006	5.0914	5.47159	3.85536	2.85259	3.92182	4.87124	4.99653	4.98425
ENSBTAT00000003783	0.641476	0.362951	0.538081	0.692065	0.175149	0.735703	1.35957	1.80298	0.931404	0.721623	1.20612	0.53698
ENSBTAT00000003784	2.11613	2.12445	3.02137	1.61885	1.40107	1.39261	3.93683	3.6559	3.70163	3.25982	3.39658	3.68781
ENSBTAT00000003785	1.82453	1.72372	1.72936	3.07032	2.12646	2.37791	2.10211	1.96105	1.90976	4.72466	5.38246	4.99618
ENSBTAT00000003788	2.15393	2.66188	2.10255	2.98521	2.79481	2.3611	1.54916	1.72016	0.902756	2.23167	2.04358	1.86631
ENSBTAT00000003789	3.29206	3.44863	3.37753	2.29295	2.26469	2.12217	3.9476	4.1197	3.62273	3.21562	4.26536	3.86585
ENSBTAT00000003794	4.4801	4.22436	4.41202	2.5388	2.45644	2.33341	4.79641	5.36002	5.19332	2.99875	3.3488	3.06679
ENSBTAT00000003795	3.36131	3.31875	3.06269	3.26571	3.06045	3.06298	2.84361	2.42175	2.02054	2.46306	2.43693	2.54132
ENSBTAT00000003797	0.907088	0.695759	1.44035	1.35367	0.916838	1.00057	1.12864	2.6795	1.268	2.37211	2.41301	1.71147
ENSBTAT00000003798	3.73213	3.90244	3.65508	4.07183	3.86008	3.84758	3.31535	3.46544	3.49717	3.35769	3.74014	3.3289
ENSBTAT00000003800	4.88121	3.97469	3.75284	0	0	0	5.19226	5.33549	4.87583	0	0	0
ENSBTAT00000003801	6.70285	6.30165	5.6403	0	0	0.543038	6.72936	5.57704	6.05097	0.33567	0	0
ENSBTAT00000003810	5.10531	4.37449	3.87139	0.0335852	0.0585444	0.0362823	4.31099	4.14794	3.51047	0.0811779	0	0
ENSBTAT00000003812	0.951111	0.189684	0.390522	0.344337	2.65284	2.22518	0.415447	1.5341	0.846931	1.112	0.895635	2.13648
ENSBTAT00000003816	5.27013	5.35999	5.1958	5.56609	5.67085	5.24732	5.34202	5.8634	5.99824	6.00377	6.653	6.44342
ENSBTAT00000003817	1.88694	1.8262	1.03075	1.07787	1.51417	1.55665	1.80588	2.83422	1.83419	3.55501	3.85218	3.5637
ENSBTAT00000003820	2.17361	2.54354	2.80673	1.78265	2.16921	2.6532	2.15731	2.77447	2.02932	0.879961	0.81986	2.35007
ENSBTAT00000003821	0.592605	0.183854	0.0532318	0.133792	0.0896199	0.36618	0.253447	0.606974	0.388444	1.85888	0.2823	0.29792
ENSBTAT00000003825	0	0.135197	0.0763368	0.120889	0.964349	1.02883	0.0489247	0.906851	0.172142	1.02142	2.49268	2.04435
ENSBTAT00000003826	3.93325	3.80372	3.9038	3.67457	3.53907	3.47649	4.39582	4.22601	4.91276	5.33193	4.82986	5.29408
ENSBTAT00000003828	2.09006	2.12475	2.06211	2.00788	2.34458	2.18264	1.7478	2.37212	1.90211	3.27509	2.65976	3.06994
ENSBTAT00000003829	1.32631	0.397156	0.624593	2.58326	1.43114	0.698059	0.405539	0.913017	1.03132	1.02474	1.1023	0.904042
ENSBTAT00000003831	0.309238	0	0.888931	0	0.346731	0	0	0	0	0	0.264917	0.460655
ENSBTAT00000003832	9.15201	9.43702	9.49769	7.61778	7.32903	7.16612	8.9828	7.12582	7.56662	7.42777	6.34267	7.28263
ENSBTAT00000003835	4.36171	4.04756	4.04151	3.57114	3.86638	3.50307	3.61689	3.89031	4.20872	3.65166	3.91915	3.69188
ENSBTAT00000003838	4.47692	4.62732	4.45149	4.49171	4.56274	4.89457	4.29881	4.47414	4.30901	4.10215	4.44613	4.05622
ENSBTAT00000003840	1.12726	0.679971	1.24315	1.18105	1.25851	1.34594	1.08257	2.75378	1.44682	2.7913	2.07692	3.16237
ENSBTAT00000003842	0	0.477853	0.520413	0.106523	0.622271	0.684831	0	0	0	0.286629	0.134159	0
ENSBTAT00000003843	0.782515	0.336682	0.158729	0.649725	0.65006	0.895105	0.927756	1.62489	0.352778	0.916636	0.196053	0.892569
ENSBTAT00000003850	1.3525	1.39593	1.37965	1.73494	2.22741	2.14487	1.31459	1.04113	0.709792	1.27501	1.32935	1.05919
ENSBTAT00000003855	5.52325	5.85351	5.75664	4.95094	5.05345	4.99939	5.60058	5.56989	5.40885	5.08375	5.37951	5.15824
ENSBTAT00000003856	2.90264	2.73413	2.48386	3.83845	3.16863	3.48562	3.51239	3.23624	3.46284	2.87793	3.72449	3.40301
ENSBTAT00000003858	0	0.129023	0	0.0960716	1.11489	0.917488	1.07053	0	0.466335	0	0.123591	0
ENSBTAT00000003860	1.77957	1.74863	1.68072	2.69124	2.85734	2.26808	2.26665	2.98772	2.65842	3.86515	3.45013	3.90244
ENSBTAT00000003865	3.44203	3.61056	3.32144	4.43472	4.34484	4.18288	3.38453	3.70569	3.16457	3.81399	3.74374	3.77673
ENSBTAT00000003868	3.93158	3.71163	3.77393	4.4162	4.14052	4.41139	3.44976	3.67604	3.28601	3.53969	3.73773	3.55531
ENSBTAT00000003869	6.53325	6.51917	6.31567	3.30092	3.11193	2.64628	6.34605	6.57903	6.12275	2.91818	2.704	2.72438
ENSBTAT00000003871	2.51734	2.63476	2.95725	2.59351	2.91618	3.23855	3.93512	3.5527	3.89203	3.92893	3.41302	4.09868
ENSBTAT00000003873	0.108813	0.186858	0.134014	0.371369	0.329992	0.344618	0.0250562	0.122527	0	0.0765781	0	0.01495
ENSBTAT00000003877	0.446046	0.726284	0.487633	0.448163	0.270291	0.617734	0.782648	0.458241	1.09453	0.0894675	0.946205	0.167299
ENSBTAT00000003878	2.69485	3.2161	3.24946	3.04171	4.25579	5.00236	1.83509	2.43826	1.93519	2.83129	2.92198	2.8813
ENSBTAT00000003881	6.58997	6.26417	6.63394	5.48538	5.67063	4.98599	6.53413	3.84817	6.10548	6.54318	6.81408	6.61725
ENSBTAT00000003882	0.236284	0	0.752672	0.185372	0	0	0.625952	0.481073	0	0.419652	0.121085	0.449945
ENSBTAT00000003883	0.0761548	0.0911891	0	0	0	0.0239394	0	0.0925438	0	0.227386	0.209783	0.0514743
ENSBTAT00000003884	4.4643	4.46774	4.42905	0	0	0.0670515	4.95175	4.5796	4.82594	0	0.0794183	0
ENSBTAT00000003886	0.715336	0.425263	0.600174	1.9045	1.65457	1.85606	1.33456	1.54364	1.90361	1.34374	3.00607	2.92717
ENSBTAT00000003890	4.26397	4.46426	4.23212	5.74867	6.11317	5.89372	4.36489	4.32226	4.43893	4.47013	4.73442	4.97415
ENSBTAT00000003895	3.86215	3.60396	3.62465	3.84595	3.39306	3.26932	4.37887	3.82454	3.95652	4.76064	3.76818	4.37019
ENSBTAT00000003897	3.47436	3.49087	3.06604	3.52124	3.46535	3.07688	3.74918	3.08971	3.47097	3.41592	3.17136	3.34193
ENSBTAT00000003899	1.17642	0.76963	0.445646	0.989774	1.04015	1.51502	0.158897	0.1297	0.147318	0.36061	0.339665	0.46132
ENSBTAT00000003902	5.8749	5.79549	6.01818	4.76109	4.42759	4.30163	6.11674	5.88663	6.76965	4.27302	4.78701	4.51107
ENSBTAT00000003904	3.14381	3.4097	3.44831	3.71335	3.7464	3.78156	3.7259	4.06902	3.90515	3.71779	3.72536	3.62703
ENSBTAT00000003905	0.792308	0.477324	0.406366	0.283289	0.331176	0	0	0.512459	0	0.237943	0	0
ENSBTAT00000003907	5.22649	5.3054	5.12558	5.06225	4.99377	4.29737	5.25657	5.00331	5.09362	5.67309	5.16916	5.72688
ENSBTAT00000003908	3.16813	3.24523	3.31499	3.93154	3.82783	3.97922	3.22788	2.89725	2.74025	2.99897	2.80106	2.834
ENSBTAT00000003922	1.15821	1.06349	1.15947	1.28916	0.940243	1.06599	1.04861	1.96991	1.1229	3.48145	1.14541	2.84368
ENSBTAT00000003923	0.783295	0.424338	0.462857	0.247777	0.219718	0.427216	0.703749	1.0136	0.384915	0.992174	0.388202	1.34684
ENSBTAT00000003924	0.539373	1.29196	1.069	2.1042	1.68446	0.000620119	1.09362e-06	0.526777	2.18252e-05	1.48941	1.11409	1.00357
ENSBTAT00000003925	1.13647	2.00972	1.68459	4.7723	3.87188	3.3108	1.05178	1.55554	2.10287	2.92023	3.22638	3.24336
ENSBTAT00000003926	6.48861	6.11486	5.81668	3.76386	3.93094	3.1982	5.5063	6.10432	5.54758	4.11878	4.52853	4.35795
ENSBTAT00000003928	0	0.054057	0	0	0.0343217	0	0.076009	0.478486	0.629756	0.138683	0.0493738	0
ENSBTAT00000003929	4.5762	4.80054	4.77054	4.16281	4.35579	4.57548	4.97765	5.37169	5.33791	4.67488	5.23499	4.85646
ENSBTAT00000003935	3.01346	3.01561	2.96423	2.15329	1.9885	1.70123	4.08142	3.03685	3.77021	2.37755	2.2661	2.69087
ENSBTAT00000003937	0.870519	0.682031	0.486607	0.356564	0.130605	0.329515	0.7498	3.4328	2.42881	1.95887	2.20586	2.05374
ENSBTAT00000003943	6.94332	3.67733	3.06696	4.79373	3.76793	3.41433	3.1826	4.64868	3.16851	3.14702	3.98205	4.57126
ENSBTAT00000003949	3.51675	3.82624	3.50981	3.07174	3.27429	2.86814	3.68528	4.09533	3.92081	4.01159	4.06968	4.20312
ENSBTAT00000003953	0.854936	1.27191	1.23093	1.75458	1.23658	1.21592	2.44564	2.2283	1.81754	2.9395	1.60417	2.76553
ENSBTAT00000003955	3.6689	3.68942	3.98871	4.00861	4.27733	3.93301	5.5674	5.8368	5.30112	5.63068	4.93231	6.37802
ENSBTAT00000003956	4.01956	4.19673	4.14661	4.41512	4.62415	4.50594	4.2477	4.22397	4.38384	4.0352	4.34944	4.16574
ENSBTAT00000003959	3.52011	2.60636	3.11887	7.69786	7.44426	7.27555	3.29318	4.67722	3.71713	6.04972	6.33371	6.43683
ENSBTAT00000003960	0.909517	1.20957	1.47236	1.12192	1.27017	1.14848	1.88621	1.48841	1.75819	0.634189	1.16931	0.82623
ENSBTAT00000003961	4.28435	3.89916	3.96614	4.53174	4.34854	4.42258	4.29829	4.00214	3.83207	4.67811	4.76771	4.44765
ENSBTAT00000003962	9.3983	9.32379	9.30734	9.06941	9.24701	8.86192	9.96772	10.1273	9.97174	9.72085	9.63178	9.68282
ENSBTAT00000003969	1.26216	0.91449	1.03597	0.648528	0.530054	0.550785	1.34649	1.91103	2.02983	1.14048	1.16502	1.27716
ENSBTAT00000003973	0.0563943	0.0228906	0	0.0323451	0	0	0.152751	0.0458834	0.0861055	0.0969322	0.0606779	0.128334
ENSBTAT00000003974	5.28963	4.98933	4.91619	4.13649	3.59744	3.19486	4.95215	5.02345	5.16181	4.29076	4.33176	4.12744
ENSBTAT00000003977	2.79944	2.80413	2.98562	3.15311	3.27414	3.08104	3.36053	4.19692	3.38868	3.53013	3.73018	3.78197
ENSBTAT00000003978	3.8284	3.9457	4.03589	3.73789	3.68439	3.74872	4.04508	3.80738	3.78297	3.89299	3.73232	3.68175
ENSBTAT00000003981	3.12406	3.42183	3.34063	2.10725	2.50082	2.37679	3.50135	3.39068	3.60061	3.98928	3.97424	3.5328
ENSBTAT00000003984	2.65678	2.00037	2.18063	1.84414	1.67563	1.87693	2.4544	1.92037	2.35677	2.23459	2.0417	1.77828
ENSBTAT00000003985	2.65807	3.2708	3.18183	1.84525	2.17722	1.87807	2.45566	3.54559	2.35801	2.23581	2.04287	3.00762
ENSBTAT00000003986	3.38979	3.41994	3.51391	3.86007	4.10003	4.06254	3.11864	3.18566	2.92749	3.44953	3.61115	3.51403
ENSBTAT00000003989	4.53757	4.45253	4.43097	4.33028	4.33922	4.18314	4.97634	5.00806	5.10187	4.72013	5.09544	4.51084
ENSBTAT00000003990	6.85604	6.7782	6.77017	6.17896	6.14536	5.99153	6.89339	6.41338	6.61511	6.11406	5.80361	6.00815
ENSBTAT00000003991	2.68915	2.46505	2.48412	5.6725	5.0566	4.80575	3.88145	2.96479	3.25786	5.29076	4.94946	5.0684
ENSBTAT00000003993	0.779953	0.219686	0.670225	0.614485	0.36267	0.870912	0.663347	0.421942	0.515645	0.149084	0.420398	0.394186
ENSBTAT00000003996	1.55366	2.45229	2.1158	2.02967	2.02477	1.54966	2.97788	1.90586	2.85432	2.72227	3.18809	2.85727
ENSBTAT00000003997	7.61827	8.36863	8.29539	0.510058	0.480231	0.766611	2.7272	0.838419	2.53753	0.795681	0.131131	0.668178
ENSBTAT00000003999	7.33855	7.4164	7.07592	6.80965	7.53165	6.91839	8.03753	8.08281	7.63791	5.47437	5.92397	5.8869
ENSBTAT00000004002	2.53848	2.39861	2.25742	2.03226	1.797	1.57452	2.02587	2.10887	2.14853	2.23034	2.21045	2.06025
ENSBTAT00000004003	2.20815	1.84162	2.12729	3.18547	3.0404	2.68895	0.838915	0.968924	0.837093	2.86608	3.17768	3.24782
ENSBTAT00000004005	0.0849923	0.314548	0.461827	0	0.043976	0	0.0969586	0.0712966	0	0.229962	0.0632616	0
ENSBTAT00000004006	0.107706	0.0870769	0.229042	0.235951	0.413411	0.310576	0.233272	0.213156	0.215738	0.437977	0.190299	0.177501
ENSBTAT00000004007	2.19111	3.18679	2.81612	2.63008	2.50032	2.36098	3.65445	3.48769	3.99409	4.17464	4.29353	4.1105
ENSBTAT00000004009	4.70886	5.27249	5.22939	4.05656	4.53247	3.79419	5.56222	4.91086	5.48573	4.00436	4.27061	4.39784
ENSBTAT00000004012	1.0229	1.02644	1.38179	1.99703	2.37279	2.61149	1.85177	2.13789	2.50844	3.19927	3.3367	3.69072
ENSBTAT00000004016	4.70099	4.47711	3.94545	3.41383	3.41087	3.64107	3.67404	3.51989	4.16455	3.41897	3.50897	3.48134
ENSBTAT00000004017	0.00305672	0.000742635	0.000193597	0.000154383	3.49597e-05	0.000207981	2.80671	2.39336	2.22275	2.15832	2.24392	2.01514
ENSBTAT00000004018	6.26457	6.18239	5.54373	7.13805	7.33229	7.05622	1.37331	0	0	0	0.341631	0
ENSBTAT00000004019	1.33732	0.832089	0.454074	2.40836	1.41802	1.7979	0.640793	0.861053	0.968476	1.34399	1.25857	1.00459
ENSBTAT00000004020	3.89771	3.62395	3.32105	2.00481	2.2108	2.70786	2.81842	2.51113	2.77877	2.68911	2.1065	2.09024
ENSBTAT00000004021	1.43428	0.898328	1.13758	0.892304	1.00063	1.78907	1.42658	0.688034	0.929093	1.37454	1.05857	1.2774
ENSBTAT00000004024	0.214851	0.0901052	0.0993508	0.127076	0.139046	0.103906	0.67017	0.0468669	0.0590865	0	0.159571	0.0386469
ENSBTAT00000004025	3.61749	3.47986	3.54046	2.90205	2.88276	2.6934	3.65527	3.29765	3.84052	3.33163	3.23987	3.29151
ENSBTAT00000004027	3.76824	3.70346	3.73179	2.78	2.46028	2.6328	3.60145	3.8821	3.91161	3.01843	3.42839	3.27636
ENSBTAT00000004031	5.05023	4.79117	4.86575	4.79536	4.91765	4.7371	5.06227	5.31616	5.30908	4.94111	4.98709	4.72567
ENSBTAT00000004032	3.84594	4.01429	3.93951	4.47432	4.50593	4.47308	4.19458	4.0931	4.05683	4.42248	4.56059	4.72267
ENSBTAT00000004034	3.44063	3.79023	4.19687	3.04892	3.07499	3.08919	3.89375	4.01038	4.40127	3.58664	5.0581	3.6955
ENSBTAT00000004035	0.527379	0.397087	0.712933	0	0	0.0205141	0.143136	0.130093	0.252777	0.295294	0.0706206	0.227432
ENSBTAT00000004036	1.73328	2.15487	2.11339	2.36435	2.54339	2.47883	1.90445	2.24865	2.12073	2.21173	2.46122	2.419
ENSBTAT00000004044	7.47915	7.66991	7.89367	9.59595	9.45765	9.33825	8.48688	9.05881	9.17799	11.624	12.2651	11.763
ENSBTAT00000004047	3.95063	3.98035	4.0058	4.66349	4.45467	4.46033	3.61212	4.08049	3.58619	4.17899	4.4611	4.71813
ENSBTAT00000004048	1.27712	1.4179	2.13977	6.25634	5.35378	4.04453	2.2043	2.47274	2.07603	4.1852	3.77887	4.0507
ENSBTAT00000004049	2.36547	2.49171	2.62179	2.43627	2.6301	2.80535	2.626	2.73077	2.55989	2.63299	2.74621	3.01608
ENSBTAT00000004051	5.81064	5.7533	6.2742	4.40211	4.58059	4.986	5.30581	4.75818	4.99837	4.32685	4.42732	4.23195
ENSBTAT00000004052	4.74638	4.44322	4.4732	3.92664	3.90302	3.38017	4.17261	3.46473	3.76988	3.43707	3.38866	3.49335
ENSBTAT00000004058	0.197853	0.0336333	0	0.191347	0.34504	0.730942	0	0.083189	0.0637937	0.029201	0.0300459	0
ENSBTAT00000004059	0	0	0	0.0372676	0.351965	0	1.51737	0	0.131141	0.437092	0	1.55955
ENSBTAT00000004062	2.99485	3.11239	3.03275	4.63339	4.46687	4.43283	3.69973	3.62974	3.06449	4.60626	4.52952	4.34018
ENSBTAT00000004065	1.52218	1.77366	2.06431	2.6261	2.65424	2.07875	2.58468	2.24072	2.61632	3.64162	3.02465	3.40356
ENSBTAT00000004068	0.812894	1.93518	1.9369	2.60128	2.05152	1.99015	1.79897	1.76241	1.86235	2.88918	2.31244	2.62428
ENSBTAT00000004070	0.413575	0.130665	0.335617	1.40451e-05	0.379417	0.198307	0.853387	2.13603	3.01627	2.81698	3.50118	3.84323
ENSBTAT00000004072	0.223547	1.92196e-06	0.000425092	0.408724	4.58253e-06	1.95318e-07	0.726602	0.00179268	4.08309e-05	1.55165e-05	0.000364579	6.09917e-06
ENSBTAT00000004081	0.283284	0.0814501	0.174401	0.116398	0	0	0.80769	0.686134	0.54697	0.0728551	0.516883	0.0704496
ENSBTAT00000004087	2.30053	2.38871	2.11748	2.4418	2.24586	2.02201	2.09653	2.28916	1.68864	2.33055	2.4072	2.47284
ENSBTAT00000004093	1.45149	1.70432	1.91182	2.12406	1.93608	2.38362	3.48378	1.50159	2.52775	4.47529	2.84087	4.26317
ENSBTAT00000004094	2.71341	2.78844	2.51297	3.47376	3.5524	3.45036	3.24003	3.42375	2.71355	3.17367	3.1408	3.45482
ENSBTAT00000004097	3.64307	3.62193	3.63824	3.74034	3.68011	3.61783	3.70521	3.69131	3.69043	3.79163	3.69089	3.80332
ENSBTAT00000004098	1.97812	2.57946	1.50326	3.94673	3.46103	3.47781	2.16281	3.30666	2.60617	4.84987	3.72097	4.26128
ENSBTAT00000004101	6.17906	6.10176	6.05332	6.05711	6.11626	5.92847	6.05018	6.26794	6.23933	6.35096	6.56664	6.71615
ENSBTAT00000004104	2.89378	3.03278	3.45702	2.84242	3.07682	2.67744	3.60401	4.21339	4.66138	4.19144	4.15638	4.0442
ENSBTAT00000004106	0.647443	0.105463	0	0	0	0	3.41881	1.93666	3.76674	0	0	0
ENSBTAT00000004111	2.91821	2.81177	2.50621	4.06762	4.13719	3.46036	3.6547	4.64215	4.14237	5.8444	5.97834	4.96204
ENSBTAT00000004113	3.95038	3.57569	3.63527	5.36981	4.84843	5.16689	3.17568	3.30852	2.84004	3.02201	3.16361	2.65377
ENSBTAT00000004114	5.61186	5.61192	5.54847	4.99582	4.9935	4.9546	5.49311	6.0645	5.8131	5.51349	5.9222	5.70831
ENSBTAT00000004115	0.6582	0.684238	0.990733	0.494359	0.907934	1.18286	0.203507	0.242999	0	0.91008	0.295593	0.835374
ENSBTAT00000004122	3.97176	4.2257	3.7258	2.68904	2.50361	2.06701	4.61803	3.41164	3.61029	2.6152	2.45413	3.00002
ENSBTAT00000004124	3.21381	3.27491	3.59003	3.50819	3.24313	3.22866	4.13596	4.17118	4.13647	4.10112	4.38203	3.94987
ENSBTAT00000004127	3.57148	2.88105	2.14284	3.25007	3.56759	2.88529	2.6041	2.32113	2.35484	3.04274	2.26274	2.94354
ENSBTAT00000004131	2.30459	1.87631	1.99602	0.630372	0.470122	0.605515	2.48266	1.43121	2.11849	1.83101	1.32342	1.32108
ENSBTAT00000004132	4.75211	4.61024	4.43214	4.18219	4.00867	4.00437	4.84794	4.98273	4.63525	4.02357	4.51715	3.8637
ENSBTAT00000004135	0.246125	0	0.411913	0	0	0.207798	0	0	0	0.339183	0.0646692	0.22695
ENSBTAT00000004136	2.812	2.25763	1.83054	3.32082	2.60992	2.33565	2.91378	2.6299	2.50996	2.24698	3.16818	2.39344
ENSBTAT00000004138	2.87447	2.74986	3.22017	2.36126	2.44587	2.42076	2.9945	3.24928	3.02528	2.96059	2.71605	2.84607
ENSBTAT00000004143	6.60616	6.86854	6.73318	5.01907	5.0453	4.49006	4.97466	5.50621	5.98363	5.29514	5.82291	5.90121
ENSBTAT00000004145	3.40937	3.53091	3.52735	2.63446	3.07075	2.21322	4.14646	4.50566	4.26825	4.91368	5.00698	4.9629
ENSBTAT00000004147	2.75568	3.05036	2.8219	4.85167	4.86343	4.42887	2.86875	2.41116	2.64598	4.54248	4.32099	4.65929
ENSBTAT00000004148	1.6669	1.74655	2.1568	1.45827	1.08998	1.25401	2.36452	1.92937	2.28409	2.16204	1.93369	2.02412
ENSBTAT00000004152	0.503416	0.74015	0.67195	5.89614	5.49414	5.27302	1.50921	1.93337	1.62726	3.76252	2.88626	3.89542
ENSBTAT00000004154	4.29652	4.33848	4.0257	3.64476	3.2085	2.96202	3.56064	3.41123	3.07632	2.82282	3.06964	2.94592
ENSBTAT00000004156	3.06292	2.46265	1.52501	1.89348	1.5372	1.42028	3.32018	3.20645	3.3642	1.65717	1.74019	1.80102
ENSBTAT00000004157	1.73436	1.2349	0.651158	0.12901	0.221091	0	0	0.493486	0.330066	0	0.16375	0.0784075
ENSBTAT00000004159	4.99096	4.6337	4.87083	5.41265	5.25859	5.16859	5.01161	4.88461	5.06401	5.27175	5.35199	5.4454
ENSBTAT00000004161	8.05131	7.90312	7.92209	7.37034	7.22518	7.17692	8.84042	8.63477	9.21189	8.62408	8.41595	7.88958
ENSBTAT00000004163	2.90012	2.97969	2.71734	4.11794	3.85666	4.05735	0.650908	0.699046	0.336277	1.58158	1.61751	1.34327
ENSBTAT00000004165	3.3038	3.09399	3.12385	3.32982	3.48183	3.48356	3.74101	4.04504	3.72126	3.96123	4.03114	3.99174
ENSBTAT00000004167	6.85484	6.81084	6.816	5.14987	5.25252	4.56858	7.03787	6.22426	7.51927	5.29524	5.1375	5.03008
ENSBTAT00000004168	5.49663	5.22275	5.5153	0	0	0	2.28718	0.939256	2.59249	0	0.139066	0
ENSBTAT00000004170	1.54104	0.000124112	3.7948	7.24503	6.78002	6.33572	0.849053	2.73425	0.00014636	5.51224	5.05227	3.06714
ENSBTAT00000004171	3.77439	3.82008	1.12074	5.75452	5.46254	4.74	3.03004	2.52873	3.28971	2.8308	3.06384	1.14344
ENSBTAT00000004174	1.85956	2.19985	2.09548	2.83604	2.71077	3.07927	2.32614	2.55079	1.99343	3.15628	3.18386	3.2698
ENSBTAT00000004177	1.51632	1.61389	2.00735	1.47668	1.76287	1.69861	2.55094	2.50383	2.17837	2.98358	2.67094	2.78958
ENSBTAT00000004179	1.69702	0.485683	0.914939	2.81907	2.12018	2.11893	0.900578	2.76129	2.37159	5.59959	5.9887	5.88481
ENSBTAT00000004180	4.00485	4.64691	4.1377	4.23459	4.27963	4.26591	3.75971	3.68418	3.66579	3.98887	4.47717	4.21276
ENSBTAT00000004181	1.82072	1.33609	2.53539	4.33345	3.99192	4.15921	2.2576	2.30124	2.1766	4.34901	4.17433	4.25085
ENSBTAT00000004182	5.03681	4.82706	4.90029	5.14943	5.35192	5.40101	4.82567	4.98674	4.94707	4.66234	4.93985	4.81251
ENSBTAT00000004184	3.5882	3.28661	3.38176	3.72937	3.96759	3.47975	4.18023	3.49093	3.87113	3.23226	3.03835	3.61826
ENSBTAT00000004187	1.99027	2.47238	2.60263	3.01854	3.46703	2.97638	3.62688	3.73976	3.48523	3.61221	3.62637	4.33532
ENSBTAT00000004188	6.70646	6.44123	6.60233	8.38231	8.44181	8.36983	6.79318	7.77099	7.14691	8.46569	8.53837	8.44135
ENSBTAT00000004190	8.1657	8.13821	8.07211	8.16924	8.88695	8.52276	10.3217	10.9362	10.869	10.329	10.9235	10.4492
ENSBTAT00000004192	1.57294	1.1588	1.42669	1.92318	1.98544	2.09719	1.96478	1.57673	1.57853	1.91757	1.74602	1.85178
ENSBTAT00000004193	0.106049	0	0.0945965	0	0.210444	0	0.121852	0	0.217208	0.349032	0	0
ENSBTAT00000004195	1.25036	1.05686	1.17212	2.39021	2.46353	1.89585	1.41538	1.10775	1.52209	2.14855	0.99953	0.826337
ENSBTAT00000004198	4.02583	4.61944	4.896	4.62689	5.20451	5.14441	4.88653	5.53022	5.06354	5.68033	5.90916	5.58665
ENSBTAT00000004201	4.26906	4.41339	4.35724	2.95199	2.40682	1.76334	3.52786	3.84298	4.17017	4.59643	4.56616	4.79342
ENSBTAT00000004204	2.77204	3.04595	2.61148	3.1035	2.85878	2.53734	2.65034	2.39136	2.51192	1.96923	2.06844	2.16218
ENSBTAT00000004205	4.37502e-05	0.000116749	0.000125189	0.00107706	5.39057e-05	1.23532e-05	0.541492	0.000162584	0.423202	4.55517e-05	7.56108e-05	1.64849e-05
ENSBTAT00000004206	1.66428	1.81383	1.80041	1.82847	1.96543	1.69963	2.50156	2.52266	2.2583	2.66779	2.59673	2.35945
ENSBTAT00000004211	2.05726	2.09762	2.19619	1.10952	1.37489	1.27955	2.75506	2.70117	2.44123	2.57583	2.41637	2.416
ENSBTAT00000004215	2.18154	1.83211	2.34799	2.95582	2.52058	2.65193	2.15715	3.46007	2.14362	3.41109	4.70846	4.12175
ENSBTAT00000004219	0.325994	8.29038e-06	2.0385e-06	0	0.21648	0.260687	0.66153	1.37336	0.954229	0.841867	0.189941	1.27934
ENSBTAT00000004220	1.17259	0.92796	0.998864	1.3303	0.938976	0.488162	1.94353	2.21295	2.00832	2.52618	2.29689	2.58084
ENSBTAT00000004221	2.24905	2.16928	2.31741	1.78752	2.29264	2.40915	2.42153	3.27463	2.85934	3.32791	2.92838	3.50104
ENSBTAT00000004222	0.698174	1.00086	0.352607	0	0	0	0	0.504773	0.431843	0	0	0
ENSBTAT00000004224	0.187516	0.531932	0.318001	0.488188	0.439125	0.0613732	0.213835	0.369114	0.28782	0.136532	0.141636	0.0675317
ENSBTAT00000004225	1.29907	1.69105	1.92219	1.82636	1.84357	2.2494	0.94605	1.1967	0.828874	1.8957	1.76313	2.11678
ENSBTAT00000004227	2.81731	3.27347	3.04164	4.18395	4.30352	4.0263	3.71243	3.42707	3.78546	4.35377	4.87557	4.69213
ENSBTAT00000004229	4.78054	4.73227	4.50295	3.66251	3.52267	3.56457	4.74406	4.71093	5.12291	4.94927	4.89219	4.94743
ENSBTAT00000004230	2.25059	2.76454	2.33906	1.84182	2.16458	2.21956	2.47557	2.64943	2.19386	2.62223	2.86862	2.5516
ENSBTAT00000004233	5.14857	4.90769	4.46978	4.16905	4.33099	3.90743	4.96649	4.66014	5.05539	4.6409	4.51048	4.65406
ENSBTAT00000004240	3.63643	3.37418	3.17213	4.35662	3.88637	4.15535	3.89436	3.5274	3.91465	4.2546	4.07035	3.87642
ENSBTAT00000004242	4.47582	3.51816	3.86497	0.394708	0.499498	0.63562	4.86777	4.514	4.57577	1.69387	1.42793	1.70558
ENSBTAT00000004243	3.96885	3.53715	3.81032	0.9847	1.69156	1.36785	4.04355	0.123842	0	0.9884	0.707845	1.89678
ENSBTAT00000004244	8.37396	7.74263	8.17981	0.374608	0	0.399143	7.89215	7.86555	8.53581	0.351345	0.132945	0.442763
ENSBTAT00000004245	6.02404	6.30172	6.53528	5.97302	6.10751	5.65334	6.87029	6.02104	6.19083	6.33683	6.21375	6.45747
ENSBTAT00000004247	1.04167	0.749972	1.32663	0.605464	0.960842	0.503624	1.86548	1.3733	0.318051	0.218345	0.432359	0.574063
ENSBTAT00000004256	0	0.0256505	0	0.0182459	0.123315	0	0.829985	0.0514517	0.271717	0.247688	0.0230225	0.648366
ENSBTAT00000004258	2.65688	2.54352	3.05234	2.7007	3.14937	3.08652	3.44429	3.73928	3.56705	3.41233	3.77006	3.62854
ENSBTAT00000004259	4.64531	4.16434	4.19403	4.22351	4.15461	4.05638	3.84704	3.81002	4.04649	3.86528	3.73369	3.74315
ENSBTAT00000004260	0.500551	0.340657	0.372522	0	0.115946	0.330315	0.645475	0.808337	0.474078	0.742008	0.682295	0.562942
ENSBTAT00000004262	3.22873	2.50132	2.04692	4.8295	3.48234	4.00225	2.32981	1.81247	2.20995	3.40168	3.38103	2.82332
ENSBTAT00000004265	3.32647	3.72526	3.51848	2.51469	2.55901	2.4701	3.78597	3.2157	3.02741	2.07948	2.1914	3.0263
ENSBTAT00000004267	3.4711	3.51018	3.91817	2.1775	2.48376	2.20098	3.57881	3.04632	3.50973	2.62097	2.57538	2.52758
ENSBTAT00000004268	3.25762	3.40896	3.27306	2.75516	3.13353	2.85284	4.17266	4.32526	4.62307	4.49781	4.54215	4.21113
ENSBTAT00000004269	0.111189	0.292874	0.512803	2.16712	2.90715	2.21762	0.240648	0.337498	0.502972	1.1278	1.2456	0.769201
ENSBTAT00000004272	4.76386	5.2247	5.06451	6.32969	6.8783	6.55151	6.29804	6.42129	6.60328	6.89843	7.23934	6.96663
ENSBTAT00000004276	4.90044	5.10021	4.6993	3.70711	3.885	3.32523	5.03485	4.66264	4.6036	3.78385	3.72295	3.88356
ENSBTAT00000004277	0.594957	0.536805	0.626624	1.49702	1.92451	1.65995	0.607402	2.64315	1.35155	1.17989	2.41811	1.5253
ENSBTAT00000004279	0.331108	0.551985	0.544291	0.200867	0.672146	0.529587	0.454377	1.90832	1.06417	2.18346	1.00226	2.91991
ENSBTAT00000004280	6.00674	6.34897	6.36277	5.42875	5.53612	5.11464	5.65131	4.88864	5.12171	4.34354	4.6238	4.91626
ENSBTAT00000004287	2.84951	2.58075	2.88893	3.09379	2.83505	2.82448	3.05154	3.65214	3.18807	4.00451	4.53186	4.04825
ENSBTAT00000004288	0	0.0699837	0.220264	0.0507565	0	0	0.27844	0.33185	0.258234	0.121936	0	0.634774
ENSBTAT00000004289	1.34056	1.46525	1.3566	1.68955	2.35974	2.40571	1.20063	1.07925	0.691146	1.28914	0.793248	1.03984
ENSBTAT00000004291	3.37592	3.34139	3.55821	2.94906	2.8207	2.89997	4.33959	3.87896	4.24588	4.25236	3.66519	3.80704
ENSBTAT00000004296	2.74917	2.71929	2.93619	4.1704	4.09716	4.20105	3.57549	3.75186	3.51422	4.12085	4.13957	4.30406
ENSBTAT00000004298	0.202724	0.446957	0.603025	2.33093	3.85745	4.23083	0.963857	1.69166	0.643515	1.92087	2.58061	2.55774
ENSBTAT00000004304	4.28481	4.54948	4.19332	3.26179	2.74571	3.04616	3.65724	3.69666	3.70762	2.13848	2.55517	1.97752
ENSBTAT00000004312	1.70473	1.6256	1.672	1.48796	1.3293	1.17278	2.03519	2.01344	1.90922	1.746	1.60712	2.00669
ENSBTAT00000004316	2.65703	2.67607	2.49723	2.34772	2.22019	1.76632	1.89063	1.63783	1.58367	1.92722	1.73738	1.61391
ENSBTAT00000004317	1.37464	1.25517	1.44879	1.64065	1.5428	1.50875	0.890103	1.63109	1.24763	2.27003	1.23928	2.96344
ENSBTAT00000004318	1.45586	2.1056	2.73047	1.68952	1.19352	1.31308	1.54923	2.43164	2.57418	1.65284	2.03912	1.1713
ENSBTAT00000004324	3.13505	3.75892	3.60146	3.50327	3.48568	3.71478	3.85846	3.59583	3.78378	3.0663	3.25035	3.2275
ENSBTAT00000004325	1.83143	1.41811	1.58904	2.76078	2.7447	2.01632	2.56202	2.25476	1.95794	1.9869	1.9302	1.99224
ENSBTAT00000004327	0.377228	0.641791	0.339828	0.495327	0.391664	0.395187	0.159101	0	0.516755	0.844787	0.462718	0.577444
ENSBTAT00000004328	0.593948	1.25723	1.55832	1.38593	1.66453	1.80909	1.80567	2.10213	1.6489	3.36589	2.64841	2.83673
ENSBTAT00000004331	2.1467e-06	6.96549e-06	0.00288019	2.82113e-07	1.015e-06	5.42122e-06	1.36697e-06	4.81801e-07	2.68563e-06	4.68128e-07	1.07483e-07	5.02054e-06
ENSBTAT00000004332	0	0.129774	0.0732144	0	0	0	0.342873	0.197332	0.245152	0.058917	0.119647	0.264003
ENSBTAT00000004333	4.37601	3.97095	3.84909	3.92551	4.18622	4.4194	3.96113	3.93709	3.96571	4.01693	4.1881	3.68906
ENSBTAT00000004334	3.4147	4.61784	3.98372	2.63048	3.52552	2.96372	3.33731	3.41016	3.76196	3.69172	2.94926	3.40144
ENSBTAT00000004335	3.27549	3.20107	3.30251	4.34813	4.22463	4.3926	3.24625	3.55089	2.83001	3.22527	3.86658	3.39994
ENSBTAT00000004337	0.996908	0.485065	0.751226	0.991465	0.920161	1.14328	1.09165	2.38461	1.35628	3.85388	1.72924	3.42051
ENSBTAT00000004338	4.60231	5.1946	4.65285	4.71895	4.88091	4.71266	5.28017	5.80761	5.05534	4.38087	4.90721	5.0021
ENSBTAT00000004348	0	0.0264274	0.0292055	0.465163	0.824132	0.295444	0	0.129067	0	0	0.0700531	0
ENSBTAT00000004350	4.49372	5.2432	5.00281	5.03464	5.6864	4.43991	4.40254	0	5.55265	5.47352	0	3.05715
ENSBTAT00000004354	0.972385	0.792803	0.232884	1.52791	0.517391	1.95459	0.321286	1.76885	0.518613	1.22959	1.95609	1.7972
ENSBTAT00000004358	3.21348	3.39562	3.28536	7.1176	7.44397	6.73311	2.61169	3.5413	3.35631	6.88856	7.84361	7.57747
ENSBTAT00000004364	6.3966	6.05632	6.00907	7.46161	7.28615	7.31627	5.91438	6.68838	5.5946	6.12788	6.1477	6.17804
ENSBTAT00000004365	3.15015	3.26349	2.96196	2.53033	2.73336	2.5375	3.27944	3.13858	3.37363	2.75135	2.7694	2.35387
ENSBTAT00000004368	0	0	0	0.901682	0.386406	0.247729	0	0	0	3.51593	2.38747	2.87053
ENSBTAT00000004370	0.634681	0.49224	0.986514	0.245218	0.481226	0.297345	0.210399	0	0.469916	0.176524	0.454616	0.644229
ENSBTAT00000004371	0.934364	1.00393	1.4068	1.44256	1.58809	1.32499	1.37257	0.929027	1.85018	1.87631	2.40776	1.71426
ENSBTAT00000004373	2.83339	2.61107	2.90607	3.73552	3.65684	3.40944	3.58104	2.93312	3.25497	3.82103	3.83261	3.7545
ENSBTAT00000004376	1.60299	1.65898	1.9564	1.13333	1.34503	1.39883	1.92892	1.23025	1.88415	1.85381	1.5652	1.59283
ENSBTAT00000004377	1.40708	0.70852	1.30258	1.72352	2.49591	2.38542	2.25555	3.36532	1.86723	3.37735	4.02761	3.35756
ENSBTAT00000004378	4.18016	3.79467	3.85	2.33317	1.70889	1.82742	2.71845	2.88363	3.21881	2.58165	2.18544	1.84458
ENSBTAT00000004381	3.03729	3.07593	3.10994	4.44998	4.36053	4.49747	2.87194	3.56009	3.00958	3.88029	4.15918	3.99746
ENSBTAT00000004384	2.89858	2.97922	2.91699	2.31419	2.20062	2.33057	3.19166	3.48149	3.41337	2.64469	2.82957	2.84584
ENSBTAT00000004385	3.27725	3.1008	3.04522	2.67702	1.95625	1.93705	0.917258	1.65842	0.270985	1.47868	1.01588	1.99735
ENSBTAT00000004386	1.15998	1.3767	1.38908	1.85119	2.48671	2.29335	1.49351	1.37659	1.21747	2.1757	2.2089	2.08412
ENSBTAT00000004389	3.59438	3.94092	3.89413	3.93737	3.73563	3.25415	4.5878	5.09557	4.61653	4.18342	4.53411	4.65685
ENSBTAT00000004393	2.73343	2.51764	2.73081	3.91781	3.68312	3.68732	3.35876	3.57664	3.11787	3.73675	3.87131	4.04994
ENSBTAT00000004398	4.68113	4.82374	4.93371	3.84555	3.98024	3.75054	4.85123	4.93032	4.95216	4.33207	4.75109	4.47006
ENSBTAT00000004400	2.00322	1.7726	1.15952	1.17468	1.49962	0.941375	1.69137	2.35261	1.53159	2.47051	2.8417	2.05689
ENSBTAT00000004401	5.0644	4.89616	4.87936	3.07289	3.29046	3.34776	4.80986	4.67018	4.84149	3.80455	3.62094	3.56571
ENSBTAT00000004402	3.53605	3.81177	5.33856	3.3404	2.3856	2.48161	4.93317	4.26635	4.66684	4.97534	4.5972	4.93085
ENSBTAT00000004404	4.01588	4.31369	4.30629	3.15315	3.56189	3.73641	4.4173	4.1863	4.31604	3.7684	3.96487	3.77824
ENSBTAT00000004405	3.79153	2.9769	2.74648	0.824388	1.05543	0.856468	1.22221	0.944929	1.67947	0.878801	0.951126	0.827969
ENSBTAT00000004406	0.0770656	0.234151	0	0.464459	0.532351	0.691935	0.0876801	0.185033	0.428652	0.698803	0.56991	0.744111
ENSBTAT00000004408	6.44607	6.0065	5.53905	6.15195	6.11866	6.37458	5.10738	5.95291	5.31311	5.23767	5.63178	5.43216
ENSBTAT00000004410	4.98256	4.72719	4.75566	6.15917	5.93925	6.19775	5.00624	5.32147	4.84417	6.20497	5.39572	6.06749
ENSBTAT00000004411	3.05524	3.07843	2.86454	1.28819	1.24283	0.548957	0.812956	2.64038	0.956877	2.41859	1.00112	1.70423
ENSBTAT00000004413	1.23644	1.99817	1.57906	1.58749	1.74916	1.56178	0.474999	1.24232	1.19729	1.66918	2.66354	1.73919
ENSBTAT00000004418	5.17614	5.19825	5.1484	4.74028	4.78314	5.06276	5.79552	5.78663	5.67052	5.49436	5.2457	5.34569
ENSBTAT00000004419	0	0.335328	0.254548	0.328827	0.361449	0.567691	0.173346	0.358085	0	0.109984	0.11494	0
ENSBTAT00000004426	0	0.128602	0.330942	0.13829	0.161275	0	0.483887	0	0.0856097	0.220474	0.228039	0.261633
ENSBTAT00000004431	4.68452	4.19057	4.03001	5.25885	5.06	4.95908	4.79864	4.14102	4.37357	4.44594	4.69572	4.59145
ENSBTAT00000004433	2.56624	2.89714	2.67363	3.24524	3.27937	2.99635	2.86105	2.86242	2.68365	3.78069	3.46977	4.02968
ENSBTAT00000004437	2.68513	3.11936	3.00941	2.99582	3.15847	2.95185	3.44935	3.35369	3.47289	3.32348	3.59253	3.32117
ENSBTAT00000004440	2.7888	2.655	3.17833	3.61652	3.70117	3.06564	3.39436	3.18218	3.03341	4.01903	4.18689	4.12601
ENSBTAT00000004441	4.3605	4.36362	4.36233	4.01038	3.90967	3.81602	4.48751	4.89327	4.85668	5.09219	5.26265	5.17083
ENSBTAT00000004442	1.83744	1.78064	1.9757	1.38229	1.42377	1.41488	1.76186	1.31214	1.18822	1.82443	1.54999	1.90704
ENSBTAT00000004443	3.36215	3.72674	3.56341	3.76405	3.58775	3.63137	3.20851	3.32707	2.95118	3.312	3.77338	3.51234
ENSBTAT00000004444	4.22966	4.68835	5.36661	5.31622	5.02269	6.09208	5.29275	3.37905	5.00167	5.76902	4.65545	7.50317
ENSBTAT00000004459	1.02462	1.58165	1.79923	0.851586	1.65628	1.27298	1.37407	1.37141	1.48035	0.730974	0.105598	0.276908
ENSBTAT00000004463	2.03386	1.54229	1.1253	0.710628	1.02837	0.968345	2.31541	2.43296	2.06098	2.10395	1.15834	1.96
ENSBTAT00000004465	3.08995	3.98186	3.04993	2.48572	2.72685	3.0096	3.59558	3.783	2.9578	2.59656	2.4521	2.34942
ENSBTAT00000004466	2.29223	2.26819	2.2255	2.85204	2.30727	2.1795	2.71501	2.59544	2.51644	2.761	2.45463	3.16316
ENSBTAT00000004472	2.75573	2.75601	2.87559	3.26179	3.52975	3.14957	3.2794	3.4293	3.34277	3.70633	3.6805	3.90753
ENSBTAT00000004474	1.60419	1.41558	1.13857	3.13133	2.7959	2.80964	1.98876	1.88883	1.78667	1.41937	1.85391	1.5947
ENSBTAT00000004475	1.11489	0.599138	1.29253	0.854432	0.645332	0.522423	1.48573	1.20889	0.452401	0.697505	0.280874	0.525301
ENSBTAT00000004477	4.88582	5.26024	5.65154	4.77828	4.68796	4.62855	4.59909	4.27637	4.58906	5.63752	5.13375	5.10006
ENSBTAT00000004480	1.66086	1.57471	1.18047	3.48848	3.23071	3.05355	3.07049	2.67309	2.34413	3.68604	3.77121	4.39467
ENSBTAT00000004482	1.85727	1.71646	2.12042	2.69554	2.66757	2.77497	2.82696	2.36718	2.7794	3.75092	3.22416	3.98354
ENSBTAT00000004485	2.74104	2.86511	2.41398	4.01355	4.25571	3.84626	2.24754	4.23756	3.98557	6.84946	7.3177	6.88302
ENSBTAT00000004486	3.06153	3.68254	3.60554	3.89233	4.44276	4.32232	4.08517	3.48459	3.75647	3.34032	3.5927	3.45789
ENSBTAT00000004487	2.58839e-05	1.99875e-05	2.57093e-05	1.27347e-05	1.2221e-05	1.74199e-05	6.35813e-07	0.571605	0	1.85581e-05	1.93841e-05	1.64166e-05
ENSBTAT00000004493	0.908867	0.993017	0.907973	1.15074	0.950952	0.701773	1.43143	1.51353	1.33921	1.98413	1.18095	1.34713
ENSBTAT00000004495	0.47333	0.501335	0.54562	0.41461	0.457827	0.163595	1.53523	0.98494	0.417228	1.21227	0.901015	1.14978
ENSBTAT00000004499	3.95483	4.20854	4.21761	4.49255	4.40556	4.8603	4.39105	4.81922	4.74931	4.78457	5.74152	5.10678
ENSBTAT00000004501	7.23055	6.79961	6.95652	2.0537	1.28063	0.74091	7.12831	7.00375	7.64583	2.33302	3.32697	1.02647
ENSBTAT00000004502	1.17386	1.60388	1.6082	1.78723	1.81427	1.80346	1.38524	1.33666	1.79816	1.87211	1.93727	1.66727
ENSBTAT00000004503	4.31392	4.17758	4.23155	5.18228	4.53473	4.63734	4.97209	4.25292	4.35583	4.62952	4.44042	4.57528
ENSBTAT00000004507	2.46685	2.45944	2.62817	2.49708	2.33076	2.55247	2.57709	2.03996	2.25142	2.5344	2.1506	2.19213
ENSBTAT00000004508	2.37704	2.19085	1.9657	2.70084	2.05881	0.549166	2.08501	1.96218	2.50714	2.32323	3.04188	2.03617
ENSBTAT00000004511	2.27074	2.72865	2.40075	2.37464	2.5072	2.55089	2.59087	2.20667	2.08688	2.22679	2.09581	1.85544
ENSBTAT00000004515	1.13328	1.30687	0.892235	0.453515	0.431072	0.651131	1.41653	0.989704	1.44737	1.02712	1.07567	0.522469
ENSBTAT00000004518	0	0	0.0123356	0	0.0205985	0.00854311	0	0.0111908	0	0.0287657	0.029573	0
ENSBTAT00000004519	9.46592	9.27275	9.11889	4.06909	4.11784	3.67934	8.4617	8.04334	8.48166	4.48354	4.5523	4.51915
ENSBTAT00000004524	4.49688	4.95634	4.71914	4.4766	4.77953	4.4828	4.75635	5.46705	5.69811	3.53077	4.5411	3.99405
ENSBTAT00000004526	7.07684	7.12157	7.04261	7.36861	7.46595	6.86666	5.9673	5.80267	6.29193	5.84405	5.61395	5.89452
ENSBTAT00000004527	1.82849	1.57597	1.37134	1.03072	1.81078	1.22566	2.05658	1.7284	2.98609	2.33545	2.11214	1.82955
ENSBTAT00000004528	4.42428	4.41665	4.38834	4.57669	4.7063	5.01432	4.76781	5.15801	4.8401	3.97799	4.84196	4.80635
ENSBTAT00000004535	0.789534	0.511432	0.372004	0.655969	0.13969	0.367365	0.685989	2.15123	1.08509	1.75027	1.56777	1.98762
ENSBTAT00000004536	2.53203	2.37218	2.37736	2.40208	2.33756	2.29838	2.46443	2.99723	2.85608	2.51685	2.69466	2.80472
ENSBTAT00000004537	0.445856	0.619233	0.660935	0.0429779	0.528249	0.209382	0.419725	0.279982	1.07934e-06	0.640009	0.500608	0.653782
ENSBTAT00000004542	0.531112	1.03568	0.026726	2.06331	2.5072	0.00118504	0.000365272	0.000264012	1.14	1.76048	1.02295	0.66509
ENSBTAT00000004546	3.99441	2.88243	2.70706	4.8258	5.04901	4.98119	3.39735	4.23466	3.71261	3.93596	4.74234	4.61542
ENSBTAT00000004547	3.21381	3.34553	3.55911	3.09126	3.0643	2.89174	3.69213	2.98235	3.26357	3.11992	3.1454	2.95256
ENSBTAT00000004549	3.69844	3.43167	3.45608	4.06375	4.17707	4.14233	3.13991	3.04528	2.9905	3.43516	3.62587	3.38115
ENSBTAT00000004550	3.72632	3.77744	3.90344	3.29039	3.32315	3.14283	3.79054	3.98415	3.79305	3.9325	3.9433	4.08504
ENSBTAT00000004552	2.45257	2.1556	1.76082	1.80717	1.65805	2.09029	1.57166	1.48524	1.01374	0.963046	1.10575	0.851942
ENSBTAT00000004553	0	0	0.108302	0.0179198	0.20582	0.0574113	0.317693	0.0254894	0.211982	0.24358	0	0.140946
ENSBTAT00000004555	2.94853	2.29593	2.49438	2.97305	3.18895	3.57392	1.95367	1.73047	1.47081	2.13596	1.97695	2.07995
ENSBTAT00000004556	0.240748	0.595147	0.976949	0.213441	0.922684	0	0.708894	1.8622	1.18199	0.0917461	1.06771	0.327374
ENSBTAT00000004557	1.63115	1.4765	1.09227	1.24389	1.13952	0.798938	0.0657377	2.23991	0.425292	1.32624	0.378234	0.354273
ENSBTAT00000004559	2.92726	2.5589	3.10555	4.34533	4.18168	4.17057	2.01658	2.17375	2.49139	4.61363	4.27864	5.03656
ENSBTAT00000004561	0.359492	0.498629	0.42496	1.31954	1.33199	1.66666	0	0.370901	0	0.672399	0.311719	0.445373
ENSBTAT00000004562	6.98633	7.16049	6.76693	7.72982	7.46906	7.80457	8.06954	9.17623	8.17963	9.57453	10.0759	10.067
ENSBTAT00000004563	4.47234	4.51096	3.99624	4.99074	4.82279	4.68528	4.42661	3.8728	4.48078	5.27391	4.8663	4.73831
ENSBTAT00000004564	0.364171	0.547049	1.01443	0.376779	0.26862	0.280836	0.479268	0.131801	0.569081	0.451382	0.465646	0.738451
ENSBTAT00000004567	4.79121	4.93486	3.97883	4.44098	3.89226	3.83865	4.92243	3.87458	4.17474	4.50936	4.27097	4.13028
ENSBTAT00000004568	3.94992	3.70953	3.70508	2.43374	2.18571	1.8949	2.98196	2.35433	3.59482	2.60015	2.59096	2.29951
ENSBTAT00000004569	0.284924	0.121216	0.133508	0.287329	0.0394809	0.308106	1.35511	0.787352	0.755529	0.30152	1.03137	0.200607
ENSBTAT00000004571	0.407442	0.72788	0	7.46191	5.79688	6.16809	0.672625	0.913606	1.30509	4.65268	4.91002	1.6107
ENSBTAT00000004574	7.76346	7.3173	7.34346	3.30775	2.30144	2.89824	6.61727	6.59805	6.96977	2.79039	2.93716	2.69227
ENSBTAT00000004579	1.22366	0.724771	0.826602	0.342857	0.0420404	0.591732	0.41369	0.569283	0.793799	0.168433	0.329827	0.523499
ENSBTAT00000004583	0.418472	0.866212	0.580456	0.789576	0.818338	1.32609	0.574564	0.344709	0.824604	1.08295	1.14179	1.01785
ENSBTAT00000004584	1.89095	1.46929	1.49326	2.44292	2.63072	2.38207	2.68614	3.33718	3.10838	4.45433	4.68165	4.23322
ENSBTAT00000004585	0	0	0	0.165337	0.0749535	0	0.0565276	0	0.0520216	0.0354169	0	0.099638
ENSBTAT00000004588	0.112066	0	0.193381	0.0969103	0	0.035687	0	0.0928119	0	0.0404808	0	0
ENSBTAT00000004589	1.53805	1.5757	2.35958	1.93812	1.80153	1.47726	2.35045	2.3856	2.03942	2.56213	2.44255	2.81656
ENSBTAT00000004593	4.90563	4.17959	5.33296	3.68819	3.47624	3.41301	3.13191	3.1562	3.3529	2.91645	3.1147	2.83296
ENSBTAT00000004594	8.32039	8.9534	8.27718	5.43679	6.51682	5.23469	4.44447	4.13341	3.85835	1.76416	1.93567	2.66786
ENSBTAT00000004595	2.29134	1.79179	1.68036	2.31557	1.93036	1.61298	2.76947	3.61377	2.55904	3.62057	4.0458	3.72144
ENSBTAT00000004597	5.01857	4.90759	4.87517	3.65373	3.84001	3.43986	5.7757	5.8779	5.56659	5.03806	5.26505	5.56275
ENSBTAT00000004602	2.37698	2.4465	2.51336	2.67994	2.87249	2.76878	2.5698	2.23553	3.09052	2.83572	2.69439	2.74539
ENSBTAT00000004604	6.45259	6.27182	6.14878	3.81562	3.51972	3.49988	5.87722	5.6629	6.19274	4.31861	4.44612	4.52624
ENSBTAT00000004608	0.0970629	0.152782	0.282443	0.563477	0.837416	0.879681	0.258869	0.727454	0.753784	1.22937	0.749976	1.18014
ENSBTAT00000004611	3.44241	3.12649	3.56105	4.83999	4.4766	4.7369	3.08153	3.51612	2.84004	3.65483	3.72763	3.64602
ENSBTAT00000004615	6.02615	5.83953	5.64907	4.32361	4.89058	4.81948	7.10708	7.23946	7.36516	7.49158	7.50514	8.3513
ENSBTAT00000004617	2.23516	1.84675	1.66109	2.77143	2.4827	2.57905	3.29821	3.22945	2.95618	3.329	3.7847	3.49806
ENSBTAT00000004619	0.301256	0.158484	0.0906288	0.296793	0.296224	0.521851	0.338063	0.22322	0.64139	0.0919526	0.329718	7.76775e-06
ENSBTAT00000004621	5.15186	4.55206	4.38246	4.49358	4.07277	3.2382	5.40737	6.06493	5.49041	6.05676	5.69185	5.58115
ENSBTAT00000004623	3.44138	3.69815	3.53183	4.63862	4.69412	4.66928	4.10545	4.2978	4.13741	3.86257	4.65443	4.09627
ENSBTAT00000004626	3.93313	3.93883	3.44966	3.8694	3.41489	3.67312	4.23328	4.03524	4.07325	3.00625	2.95153	2.86984
ENSBTAT00000004627	2.12336e-06	1.14375e-06	1.39733e-06	1.31148e-06	8.59797e-07	9.15631e-07	2.96023e-06	3.09377e-06	1.9393e-06	2.05435e-05	1.23326e-05	6.83557e-06
ENSBTAT00000004630	5.8153	5.32912	5.30213	4.88425	4.61901	5.07532	2.22136	2.65489	2.70299	2.83832	3.01111	2.90257
ENSBTAT00000004631	3.02544	2.46062	2.48574	3.37893	4.15927	3.94417	2.7472	3.61851	2.99006	2.36159	2.48389	2.54186
ENSBTAT00000004632	2.24643	2.49643	2.45943	2.72757	2.37072	2.85728	2.23607	2.33045	1.84992	2.61392	2.41582	2.44407
ENSBTAT00000004635	0	0.302917	0	0	1.00562	0	5.07427	0.195969	4.35245	2.78154	0.515164	1.50273
ENSBTAT00000004636	3.31418	3.05999	3.10655	2.87292	2.55204	2.46537	2.77358	2.8112	3.41842	3.07093	3.17125	2.98868
ENSBTAT00000004638	2.50625	2.61462	2.86763	3.25785	3.16119	2.87167	2.64853	3.14058	2.92185	3.45025	3.77625	3.902
ENSBTAT00000004639	2.86041	2.69289	2.55653	1.79077	2.10614	1.70891	3.67289	2.88526	2.86717	3.27769	3.2493	2.252
ENSBTAT00000004641	0	0	0.238452	0.0832851	0.144857	0	1.64708	0.686112	0.0806401	4.05812	7.06965	6.14515
ENSBTAT00000004643	0.678887	0.923289	0.705375	1.55694	1.89081	1.83162	1.14549	1.84076	1.42601	2.6626	2.83668	2.6061
ENSBTAT00000004644	2.21681	2.00298	2.41542	1.80617	1.68865	1.66782	2.97244	2.72978	3.55341	2.91189	3.25221	3.28681
ENSBTAT00000004645	4.72324	4.24357	4.54946	3.58223	3.39535	3.08817	3.46656	3.60446	3.53284	3.51775	3.21222	3.23017
ENSBTAT00000004647	2.18458	1.40575	2.83713	1.17041	1.40206	1.22487	1.38004	1.44192	0.27939	0.5121	2.34439	0.643471
ENSBTAT00000004648	0	0	0.197997	3.21295	2.14659	3.82258	0.424249	0	0.3939	0.158346	0	0.267428
ENSBTAT00000004650	0.450152	1.02046	0.624619	2.04262	1.54961	1.91552	1.22731	1.19917	1.40198	1.86053	1.91914	1.81608
ENSBTAT00000004651	1.22655	1.69351	1.13098	0.776147	1.15643	0.566783	0.719202	1.48295	0.899045	1.60656	1.79041	1.38757
ENSBTAT00000004653	2.80582	2.44466	2.36993	1.48788	1.27894	0.998456	2.50385	2.40023	2.64121	1.83228	1.21573	1.32846
ENSBTAT00000004655	4.0758	3.99261	4.07056	3.48105	3.45926	3.41298	3.38083	3.18642	3.38439	3.07131	2.93316	3.35331
ENSBTAT00000004656	5.65442	5.32002	5.41444	5.5395	5.38486	5.25624	5.50386	5.7539	5.48492	4.84657	5.21481	5.31396
ENSBTAT00000004657	3.95945	3.76804	3.72607	2.53618	2.40268	2.69131	3.55669	3.99999	3.71308	2.63157	2.67257	2.64529
ENSBTAT00000004658	7.71953	7.14879	7.54064	6.96761	6.71291	6.79426	7.15836	7.80084	7.52547	6.45908	6.94462	6.51481
ENSBTAT00000004659	0.462886	0.503413	0.462491	0	0.22346	0.0824061	0.403454	0.592847	0.428913	0.416137	0.899345	0.901345
ENSBTAT00000004664	1.521e-05	9.36893e-06	3.166e-05	4.88859e-05	1.48438e-05	5.35146e-05	8.47093e-06	7.02604e-06	5.37158e-06	3.95921e-06	3.10133e-06	3.56018e-06
ENSBTAT00000004666	4.10611	3.44509	3.97721	4.22282	3.5833	4.18701	3.32615	3.35667	3.01241	3.37493	3.27615	3.26928
ENSBTAT00000004667	3.81518	3.93163	3.65643	3.09163	3.34788	3.62144	3.7876	3.67443	3.76361	3.61335	3.48747	3.41316
ENSBTAT00000004668	5.77977	5.20012	4.80143	5.82518	5.59611	4.79519	6.37447	6.11569	6.26531	5.71978	5.8804	6.00739
ENSBTAT00000004669	2.41892	2.13509	2.19841	2.35272	2.22858	2.12601	2.4385	2.95436	2.63997	3.28763	3.1198	3.26567
ENSBTAT00000004675	0.261061	0	0.0499435	0.241165	0.485241	0.229178	0	0	0	0.116134	0.194618	0.0753831
ENSBTAT00000004678	0.260271	0.110143	0	0.0269264	0.0469528	0	0.246016	0.404392	0.386758	0.454249	1.03616	0.507167
ENSBTAT00000004683	0.204727	0.0434762	0.225539	0.854407	1.1805	1.4078	0.22964	0.358103	0.0560885	0.487886	0.735818	0.444002
ENSBTAT00000004686	2.82587	3.8586	2.58284	2.08742	1.97117	1.94575	3.96967	4.66799	4.37421	3.53258	4.21672	3.67092
ENSBTAT00000004687	3.07214	3.15684	3.49798	1.89243	2.06758	1.87284	1.90205	1.82681	2.37281	1.93549	1.71827	1.56731
ENSBTAT00000004690	0	0.100085	0.733101	0.0951174	0.393936	0.510015	0.343614	0.423344	0.549053	1.14591	0.775773	1.72413
ENSBTAT00000004696	4.35197	4.46416	4.4362	4.2302	4.58646	4.6949	4.55084	5.63747	4.60142	4.89344	4.93401	5.09726
ENSBTAT00000004699	3.3576	3.31551	3.49016	2.79333	2.21565	2.24943	3.5839	3.49738	3.28499	3.60139	3.48552	3.4566
ENSBTAT00000004701	3.74274	3.48219	3.21127	3.8879	3.41777	3.354	3.77578	4.50772	4.26032	3.18115	3.11321	3.31827
ENSBTAT00000004704	0.671	0.534792	0.401839	0.607103	0.733421	1.38907	0.265923	0.564481	0.401379	0.256605	0.175915	0.311172
ENSBTAT00000004711	2.59565	2.575	2.57418	2.3479	2.13104	1.6421	2.92439	2.54832	2.78003	1.87882	1.65937	1.45607
ENSBTAT00000004713	0.69813	0.662623	0.634813	2.19715	1.14452	0.87929	0.822718	0.928642	0.676672	1.26113	0.936538	0.801357
ENSBTAT00000004717	3.20611	3.12427	3.26363	2.00147	1.68119	0.67218	3.51262	3.32436	3.03514	2.98881	2.91915	2.91704
ENSBTAT00000004721	2.83731	2.87396	2.37544	3.8118	3.8926	3.9055	3.28984	4.17633	3.12287	4.82685	4.68597	4.79707
ENSBTAT00000004724	1.04597	1.13009	1.27362	2.4512	2.6375	2.4048	1.64651	1.92683	1.63185	1.61035	2.01181	1.55264
ENSBTAT00000004728	6.55435	6.27245	6.26061	4.29843	4.15243	4.12972	5.54717	5.72818	5.93521	4.63827	4.71189	5.21868
ENSBTAT00000004729	0.451749	1.02538	0.986784	0.152998	0.589657	0.163182	1.23561	1.00896	1.17669	0	0	0
ENSBTAT00000004734	1.14458	1.24918	1.22902	1.6418	2.37006	2.33611	1.77143	2.49579	1.148	2.84422	2.13895	2.46002
ENSBTAT00000004736	0.524428	0.459691	0.419284	2.49946	2.3293	2.28206	0.966811	1.40355	1.34578	3.58437	4.25271	3.02833
ENSBTAT00000004739	6.30489	6.38975	6.26372	4.2296	4.35303	3.90173	6.39922	4.15861	5.72779	4.00242	3.61264	4.27703
ENSBTAT00000004744	1.59186	2.36994	1.90818	1.95849	2.04008	2.3328	2.16782	1.69	2.76143	1.76229	2.02467	1.86265
ENSBTAT00000004746	0.0907105	0.301563	0.130451	0.403872	1.2846	0.300611	0.839109	0.152126	0.0887606	0.959611	0.0512137	0.461896
ENSBTAT00000004747	3.59286	3.86155	4.05417	3.4829	4.44527	4.00385	3.51403	3.80978	3.62136	3.47428	3.97978	3.75325
ENSBTAT00000004751	8.56003	8.54709	8.27133	8.16508	8.4471	8.47146	8.42761	8.25062	8.33664	8.18422	8.25661	8.55089
ENSBTAT00000004752	3.55663	3.57778	3.24077	2.55695	2.19015	1.64942	3.97338	3.68548	3.88261	2.54333	3.11711	2.60228
ENSBTAT00000004757	2.7671	3.02712	3.05695	1.63521	1.72079	1.77055	2.35025	2.55919	2.53949	2.71831	2.68836	2.59057
ENSBTAT00000004758	5.94618	2.29734	1.33673	2.48611	2.86769	3.68708	4.01733	1.56854	2.74441	2.32137	3.05788	2.53481
ENSBTAT00000004759	0.0841868	0	0.14632	1.43402	1.09331	1.36481	1.20633	0.263729	1.53636	1.3201	1.66635	1.31255
ENSBTAT00000004760	3.02642	2.80429	2.8645	5.21853	5.28972	5.45314	3.60367	3.59017	2.97877	4.20641	3.98354	4.02215
ENSBTAT00000004763	2.63533	1.83688	0.876539	0.000109013	2.49486	2.87963	2.31679	2.23234	1.54434	1.8202	0.736607	0.000123388
ENSBTAT00000004768	1.26485	1.41345	1.28596	1.6024	1.42582	1.26226	1.49399	1.72752	1.06465	1.15558	1.86699	1.26616
ENSBTAT00000004769	0.114234	0.179351	0	0	0.0601377	0.208491	0.252239	0	0.526585	0.775582	0.800404	0.851281
ENSBTAT00000004772	5.43251	4.65544	5.06926	4.19352	4.34762	4.05077	4.93478	4.72612	4.73581	4.38232	4.23629	4.66739
ENSBTAT00000004780	4.65256	5.57421	5.11269	5.26173	5.07077	4.77544	6.01541	5.16565	5.94111	5.39	6.67886	5.36439
ENSBTAT00000004781	0	0	0	3.88495	5.56534	4.39654	0.385069	0.0316174	0.039969	0	0.898195	0
ENSBTAT00000004785	0	0.0559675	0	0.0403415	0	0	0.0787433	0.0576855	0.0725871	0.393825	0.444791	0
ENSBTAT00000004788	0.117759	0.095226	0.0757562	0.0392165	0.156417	0.317649	0.076202	0.0689788	0.103831	0.0121246	0	0.023064
ENSBTAT00000004789	1.43113	1.74567	1.85975	5.05282e-05	0.00284234	1.11846	0.674606	1.28886	1.66628	1.73263	2.20263	1.53591
ENSBTAT00000004790	0	1.24861	0.935898	0.914773	1.40364	0	0.54852	0.442923	0	1.43557	0.393186	0.371087
ENSBTAT00000004794	2.75355	3.34757	3.20619	3.71067	3.67634	3.41342	3.29945	3.02035	3.1831	3.51343	3.58471	3.61924
ENSBTAT00000004797	0.107439	0	0	0.536103	0.48356	0.422025	0.23727	0.0913171	0.656998	0.151899	0	0.0754539
ENSBTAT00000004800	0.0546608	2.24801	1.34644	0	0.412067	0.131886	0.177767	0.431858	0	0	0.116741	0
ENSBTAT00000004805	4.17168	4.09099	4.21147	3.11078	2.72251	2.96582	3.50999	3.71958	3.8411	2.34651	3.05392	2.8235
ENSBTAT00000004806	3.31826	3.17102	3.31441	4.10064	4.03389	3.86854	4.00819	3.75974	4.27829	3.77825	4.04487	3.57536
ENSBTAT00000004808	0.0921172	0.0744308	0.233522	0	0.182603	0	0.105341	0	0	0.556467	0.0688528	0.184273
ENSBTAT00000004810	2.86463	2.29896	2.43427	5.43305	5.74992	5.63098	3.85278	5.14144	4.8899	6.68815	5.15095	6.18493
ENSBTAT00000004811	3.46433	3.45533	3.51326	5.20807	4.71558	4.70887	3.70945	3.83741	3.70062	4.42187	4.4355	4.53033
ENSBTAT00000004813	4.61432	4.89961	4.81446	3.89758	3.89384	3.68047	4.41938	4.8637	4.52619	4.90201	5.26805	4.76219
ENSBTAT00000004815	0.137432	0.263745	0.390278	0.681789	0.56686	0.169096	0.423842	0.934094	0.450479	1.25091	1.30199	0.914422
ENSBTAT00000004817	1.97081	3.01227	2.95709	2.21546	2.17935	2.11911	2.61639	2.70883	2.3903	2.27367	2.36057	2.0016
ENSBTAT00000004821	1.19711e-05	3.75674e-06	7.78873e-06	0	0	0	0.970374	1.59804	3.18891	1.5494e-06	5.70759e-07	0.00593551
ENSBTAT00000004823	0.214526	0.21519	0.0991945	0	0	0.200519	0.0640633	0.220106	0.170193	0	0.0818577	0
ENSBTAT00000004825	3.25805	3.59362	3.53599	3.80202	3.88763	3.87183	3.57278	3.48944	3.49175	3.36882	3.70922	3.40607
ENSBTAT00000004828	0.478329	0.860028	0.522327	0	0.0235296	0.112439	0.916263	0.541647	0.493162	0.888126	0.606237	0.482056
ENSBTAT00000004831	4.03341	3.82341	3.69815	3.46447	3.25263	2.93028	4.04062	3.88406	4.00695	3.5789	3.54063	3.86549
ENSBTAT00000004832	4.40964	4.0535	3.75303	2.53417	2.93292	2.66981	5.64451	5.19464	5.36962	2.91267	2.84492	2.92551
ENSBTAT00000004833	1.79072	1.94608	2.03626	1.76911	1.56503	1.53548	2.8349	1.82883	3.47405	1.81753	2.57695	1.86503
ENSBTAT00000004834	4.37741	4.29081	4.1158	3.96285	3.72026	3.44667	3.94066	3.28139	3.67221	4.25067	4.17695	4.2942
ENSBTAT00000004835	5.04973	4.81536	5.01572	3.89194	3.47721	3.56235	5.3431	4.88605	5.04293	4.70094	4.94164	4.89029
ENSBTAT00000004836	6.10335	6.24677	6.07859	8.08063	7.98093	7.64206	6.79574	6.3607	6.75979	8.4459	8.44453	8.59204
ENSBTAT00000004838	0	0.0412333	0.365856	0.141953	1.19521	0.619974	0.316163	0.27187	0.41977	0.355432	0.633176	0.474844
ENSBTAT00000004843	2.71153	3.39638	3.43334	4.21673	5.0098	4.91146	4.75594	3.57561	5.37941	4.50081	4.32707	3.84289
ENSBTAT00000004844	2.62781	2.22153	2.32791	2.69503	2.27091	2.24692	2.49269	2.17192	2.81957	2.73996	3.00001	2.83449
ENSBTAT00000004845	2.93049	3.03275	3.05341	3.4841	3.14958	3.19993	3.40728	3.44858	3.80273	3.76865	3.61792	4.34914
ENSBTAT00000004849	0	0.109289	4.75772e-07	0	0.112256	1.01216	5.09349e-07	2.50622e-07	0	0	0	2.71602e-07
ENSBTAT00000004852	2.58225	2.92512	2.7515	3.4561	3.3173	3.04748	3.07653	2.76781	3.01744	2.89208	2.77303	2.96537
ENSBTAT00000004853	2.66443	2.79765	2.60407	3.58418	3.03701	3.68188	2.15736	3.1351	2.28951	3.44145	3.54409	3.38857
ENSBTAT00000004864	1.42406	1.57005	0.861409	0.633716	0	0.479726	0.244416	0	0	0.543464	0.312167	0.925649
ENSBTAT00000004870	2.12243	2.28721	2.3835	2.59988	2.40076	2.86217	2.45699	0.843514	0.93268	1.92859	1.19223	2.23314
ENSBTAT00000004874	3.65711	3.86464	3.81525	3.27675	3.14558	3.40214	3.55283	3.21112	3.36778	2.86535	2.77809	2.78779
ENSBTAT00000004876	3.45527	3.58447	3.16596	4.42598	4.25782	4.37325	3.60784	3.79945	3.66981	4.05675	4.64425	4.32328
ENSBTAT00000004878	6.61445	7.06251	6.99878	5.62571	5.69165	5.50014	5.66676	5.668	5.93668	4.52152	5.04917	5.08687
ENSBTAT00000004879	5.14423	5.06263	4.90002	8.92742	8.83104	8.77456	5.73118	5.22125	5.66305	6.43881	5.99942	6.82845
ENSBTAT00000004880	4.01399	3.84724	3.99232	3.84388	3.75814	3.9571	3.59288	4.00037	4.35459	3.74927	3.92126	4.09444
ENSBTAT00000004881	1.80766	2.3485	1.97201	2.83831	2.79194	2.71363	1.91913	3.11996	2.00498	2.3992	2.39642	2.56957
ENSBTAT00000004882	0.11067	0	0	0	0.0844329	0.454958	0.124741	0.0465342	0.115048	0.418965	0.0814167	0.112183
ENSBTAT00000004885	3.61176	2.89853	3.18104	3.93179	3.76179	3.69605	2.5761	3.6414	2.27001	3.98651	3.53446	3.87353
ENSBTAT00000004887	2.3299	3.0027	3.24366	2.74022	2.84877	2.8224	3.18214	3.21118	3.23806	3.39928	3.45597	3.5504
ENSBTAT00000004890	5.24621	5.41708	5.35233	4.55862	4.54896	4.67463	6.43424	6.30259	6.36191	5.13924	5.49566	5.4227
ENSBTAT00000004892	3.00546	2.82267	2.85725	7.57307	7.94445	7.60625	3.61589	4.55323	4.47916	8.48997	8.56766	8.78695
ENSBTAT00000004893	2.28996	2.43335	2.34575	2.26802	2.17198	1.7732	2.5187	3.07309	2.75646	3.27734	3.19452	3.21983
ENSBTAT00000004896	2.19253	1.58342	1.81945	3.31465	3.01046	2.53648	1.89816	2.37603	2.2637	2.89626	3.38793	3.19227
ENSBTAT00000004897	5.14607	5.15967	4.99162	4.6463	4.418	4.22866	6.41117	6.33609	6.21243	4.69257	4.9543	4.83668
ENSBTAT00000004899	1.86137	1.68095	2.03621	2.55879	2.64287	2.22573	2.37563	1.94881	2.33256	3.11254	2.47418	2.58888
ENSBTAT00000004901	4.68792	4.87964	4.50541	4.26562	4.27189	4.3981	1.3669	0.506745	0.615874	1.3061	0.559918	0.526434
ENSBTAT00000004903	3.2511	3.0434	3.05467	4.44074	4.10255	4.16867	3.60044	2.65008	3.08659	3.63702	3.24744	2.80988
ENSBTAT00000004905	0.316879	0.112565	0.157579	0.762997	0.587267	0.796827	0.732896	0.575343	0.710965	0.73395	0.97974	0.956486
ENSBTAT00000004912	2.2787	2.69692	2.51299	3.07087	3.10666	2.76853	4.2261	2.34562	3.59563	2.65913	2.47746	3.04369
ENSBTAT00000004913	0	0.0833828	0	0.089065	0.641076	0.0647704	2.36465	0	1.25513	0.833626	0.0383498	0.459626
ENSBTAT00000004914	0	0.0796282	0	0	0.143209	3.15433e-06	1.55341	0	0.410932	0.376273	0.0739022	0.0756716
ENSBTAT00000004915	1.09099	0.627585	0.380083	0.486032	1.00771	0.364384	0	0.135035	0.692574	0.49918	0.683859	0.852573
ENSBTAT00000004917	2.9762	3.10078	3.40381	2.66973	2.49723	2.60392	3.48029	2.73208	3.57225	3.60947	3.47392	3.15994
ENSBTAT00000004918	1.43708	1.18592	1.33129	1.75185	1.33399	1.07587	1.86946	1.5001	1.88263	0.98481	0.808854	0.975704
ENSBTAT00000004922	4.79529	4.76772	4.93479	5.03091	5.23113	5.05831	4.88237	4.7405	5.32868	4.63025	4.96172	5.10325
ENSBTAT00000004925	3.71293	3.68106	3.66355	3.1465	3.40412	3.49093	3.1638	3.59332	3.49761	2.73347	2.57859	3.1041
ENSBTAT00000004926	0.0729519	0.414806	0.500345	0.592616	0.395986	0.569792	0.615606	0.229086	0.77168	0.197911	0	0.277641
ENSBTAT00000004927	0	0.139747	0	0	1.76306	0	4.14663	0	3.43772	1.39255	0.507754	0.969345
ENSBTAT00000004929	3.98938	4.22381	4.21553	4.89796	4.91683	4.93209	4.22097	4.15708	4.4068	4.35635	4.61546	4.33269
ENSBTAT00000004931	0	0.0912594	0.0511866	3.01231	3.09547	3.3972	0.186864	0.0934738	0.374738	1.76884	0.962251	0.526371
ENSBTAT00000004933	4.10085	4.07976	3.6424	3.59383	3.21691	3.47376	4.89341	4.70271	4.68734	3.63263	3.44344	3.94686
ENSBTAT00000004942	0.385205	0.316953	0.668001	0.818666	0.987765	1.26106	0.431635	0.670818	0.849695	0.325316	0.952846	0.790765
ENSBTAT00000004943	0.202682	0.403717	0.181357	0.430149	0.071738	0.0444392	0.080349	0.369164	0.396292	0.361585	1.04918	1.01964
ENSBTAT00000004948	4.06626	3.70828	4.11116	3.91711	3.81244	3.54125	3.85812	3.66592	3.93988	3.22186	3.23093	3.59372
ENSBTAT00000004949	3.83605	3.65723	3.74613	3.80863	4.01761	3.86665	4.46837	3.67257	4.1058	4.46634	4.5864	4.58763
ENSBTAT00000004952	6.92279	6.78137	6.44702	5.96551	6.05063	5.77002	6.91771	6.94925	7.65917	6.71827	7.16967	7.11726
[truncated: 15,644 more rows]
